# Supplementary material for: Accurate prediction of195Pt NMR chemical shifts for a series of Pt(ii) and Pt(iv) antitumor agents by a non-relativistic DFT computational protocol
Source: Royal Society of Chemistry journal article supplement (doi:10.1039/c3dt53594k), 2014-01-01
Supplement: c3dt53594k.pdf [file c3dt53594k.pdf]

# **Accurate Prediction of $^{195}\text{Pt}$ NMR Chemical Shifts for a Series of Pt(II) and Pt(IV) Antitumor Agents by a Non-Relativistic DFT Computational Protocol**

**Athanassios C. Tsipis\* and Ioannis N. Karapetsas**

*Laboratory of Inorganic and General Chemistry, Department of Chemistry, University of Ioannina,  
451 10 Ioannina, Greece*

**Electronic Supporting Information**

## Table of Contents

|                                                                                                                                                                                      |     |
|--------------------------------------------------------------------------------------------------------------------------------------------------------------------------------------|-----|
| <b>Complete list of reference 43.</b>                                                                                                                                                | S3  |
| <b>Table S1</b> Structural and $^{195}\text{Pt}$ NMR parameters of the $[\text{PtCl}_6]^{2-}$ and $[\text{PtCl}_4]^{2-}$ reference compounds calculated at various levels of theory. | S4  |
| <b>Table S2</b> The changes of the isotropic shielding tensor elements ( $\sigma^{\text{iso}}$ ) observed along the diabatic (unrelaxed) rotation around the Pt-N bond.              | S5  |
| <b>Table S3</b> Selected structural parameters of the optimized geometries of the carboxylato- <i>cis</i> -bis(amine) Pt(II) anticancer agents.                                      | S6  |
| <b>Table S4.</b> Selected structural parameters for a series of diacetylbis(amine)platinum(II) complexes.                                                                            | S7  |
| <b>Table S5</b> Selected structural parameters for octahedral Pt(IV) anticancer agents.                                                                                              | S8  |
| <b>Table S6</b> Cartesian Coordinates and energies of antitumour agents (in Hartrees)                                                                                                | S9  |
| Output file for NMR calculation of $[\text{PtCl}_4]^{2-}$                                                                                                                            | S67 |
| Output file for NMR calculation of $[\text{PtCl}_6]^{2-}$                                                                                                                            | S88 |

**List of authors in Ref. 43**

Gaussian 09, Revision A.02, Frisch, M. J.; Schlegel, H. B.; Scuseria, G. E.; Robb, M. A.; Cheeseman, J. R.; Zakrzewski, V. G.; Montgomery, J. A.; Vreven, T.; Kudin, K. N.; Burant, J. C.; Millan, J. M.; Iyengar, S. S.; Tomasi, J.; Barone, V.; Mennucci, B.; Cossi, M.; Scalmani, G.; Rega, N.; Petersson, G. A.; Nakatsuji, H.; Hada, M.; Ehara, M.; Toyota, K.; Fukuda, R.; Hasegawa, J.; Ishida, M.; Nakajima, T.; Honda, Y.; Kitao, O.; Nakai, H.; Klene, M.; Li, X.; Knox, J. E.; Hratchian, H. P.; Cross, J. B.; Adamo, C.; Jaramillo, J.; Gomperts, R.; Stratmann, R. E.; Yazyev, O.; Austin, A. J.; Cammi, R.; Pomelli, C.; Ochterski, J. W.; Ayala, P. Y.; Morokuma, K.; Voth, G. A.; Salvador, P.; Dannenberg, J. J.; Zakrzewski, V. G.; Dapprich, S.; Daniels, A. D.; Strain, M. C.; Farkas, O.; Malick, D. K.; Rabuck, A. D.; Raghavachari, K.; Foresman, J. B.; Ortiz, J. V.; Cui, Q.; Baboul, A. G.; Clifford, S.; Cioslowski, J.; Stefanov, B. B.; Liu, G.; Liashenko, A.; Piskorz, P.; Komaromi, I.; Martin, R. L.; Fox, D. J.; Keith, T.; Al-Laham, M. A.; Peng, C. Y.; Nanayakkara, A.; Challacombe, M.; Gill, P. M. W.; Johnson, B.; Chen, W.; Wong, M. W.; Gonzalez, C.; Pople, J. A. Gaussian, Inc., Wallingford CT, 2009

**Table S1.** The structural and  $^{195}\text{Pt}$  NMR parameters of the  $[\text{PtCl}_6]^{2-}$  and  $[\text{PtCl}_4]^{2-}$  reference compounds calculated at various levels of theory along with the percent deviations from the experimental data.

| Functional      | $[\text{PtCl}_6]^{2-}$ |                |           | $[\text{PtCl}_4]^{2-}$ |                |           |
|-----------------|------------------------|----------------|-----------|------------------------|----------------|-----------|
|                 | Pt-Cl (Å)              | $\sigma$ (ppm) | Dev(%)    | Pt-Cl (Å)              | $\delta$ (ppm) | Dev(%)    |
| SVWN            | 2.363                  | 46.0           | -103      | 2.370                  | 521            | -68       |
| HSE2PBE         | 2.402                  | -1626          | 0         | 2.424                  | 1254           | -23       |
| X3LYP           | 2.430                  | -2144          | 32        | 2.455                  | 1605           | -1        |
| O3LYP           | 2.426                  | -1033          | -37       | 2.450                  | 1309           | -20       |
| M05-2X          | 2.402                  | -4941          | 204       | 2.438                  | 6171           | 279       |
| PW91PW91        | 2.428                  | -595           | -63       | 2.439                  | 631            | -61       |
| CAM-B3LYP       | 2.401                  | -2574          | 58        | 2.430                  | 1772           | 9         |
| B3PW91          | 2.409                  | -1592          | -2        | 2.430                  | 1430           | -12       |
| <b>PBE0</b>     | <b>2.396</b>           | <b>-1611</b>   | <b>-1</b> | <b>2.419</b>           | <b>1684</b>    | <b>3</b>  |
| <b>mPW1PW91</b> | <b>2.400</b>           | <b>-1689</b>   | <b>4</b>  | <b>2.423</b>           | <b>1659</b>    | <b>2</b>  |
| mPW3PBE         | 2.405                  | -1514          | -7        | 2.425                  | 1433           | -12       |
| PBEh1PBE        | 2.401                  | -1400          | -14       | 2.424                  | 1268           | -22       |
| M06-2X          | 2.408                  | -5584          | 243       | 2.456                  | 6137           | 277       |
| M06-L           | 2.429                  | -1000          | -39       | 2.464                  | 21             | -99       |
| M06             | 2.414                  | -2048          | 26        | 2.443                  | 572            | -65       |
| <b>B3LYP</b>    | <b>2.435</b>           | <b>-1756</b>   | <b>8</b>  | <b>2.459</b>           | <b>1518</b>    | <b>-7</b> |
| BP86            | 2.435                  | -1051          | -35       | 2.445                  | 619            | -62       |
| HCTH407         | 2.445                  | -1191          | -27       | 2.462                  | 933            | -43       |
| tHCTH           | 2.428                  | -731           | -55       | 2.440                  | 515            | -68       |
| wB97XD          | 2.405                  | -2797          | 72        | 2.438                  | 1563           | -4        |
| BMK             | 2.408                  | -3594          | 121       | 2.459                  | 2592           | 59        |
| VSXC            | 2.443                  | -1976          | 21        | 2.477                  | 510            | -69       |
| BB95            | 2.434                  | -1074          | -34       | 2.446                  | 409            | -75       |
| TPSS            | 2.427                  | -426           | -74       | 2.443                  | 355            | -78       |
| LC-wPBE         | 2.374                  | -2716          | 67        | 2.438                  | 2095           | 29        |
| <b>B97-2</b>    | <b>2.411</b>           | <b>-1678</b>   | <b>3</b>  | <b>2.435</b>           | <b>1599</b>    | <b>-2</b> |
| SC              | -                      | -2063          | 27        |                        | 1782           | 9         |
| Expt            | 2.316                  | -1628          |           | 2.315                  | 1628           |           |
| aiMD            | 2.385±0.021            |                |           | 2.346±0.026            |                |           |
| EXAFS           | 2.330                  |                |           | 2.304                  |                |           |
| ADF-COSMO       | 2.375                  |                |           | 2.348                  |                |           |

**Table S2.** The changes of the isotropic shielding tensor elements ( $\sigma^{\text{iso}}$ ) observed along the diabatic (unrelaxed) rotation around the Pt-N bond computed at the PBE0/SARC-ZORA(Pt)  $\cup$  6-31+G(d)(E) level.

| Compound                                                                                                    | Torsional barrier | $\delta(^{195}\text{Pt})_{\text{max}}(\varphi^\circ)$ | $\delta(^{195}\text{Pt})_{\text{min}}(\varphi^\circ)$ | $\Delta[\delta(^{195}\text{Pt})]$ |
|-------------------------------------------------------------------------------------------------------------|-------------------|-------------------------------------------------------|-------------------------------------------------------|-----------------------------------|
| <i>cis</i> -(CH <sub>3</sub> NH <sub>2</sub> ) <sub>2</sub> PtCl <sub>2</sub>                               | 1.2               | -1041 (150)                                           | -1097 (50)                                            | 56                                |
| <i>cis</i> -(C <sub>2</sub> H <sub>5</sub> NH <sub>2</sub> ) <sub>2</sub> PtCl <sub>2</sub>                 | 3.6               | -1099 (130)                                           | -1155 (50)                                            | 56                                |
| <i>cis</i> -( <i>n</i> -C <sub>3</sub> H <sub>7</sub> NH <sub>2</sub> ) <sub>2</sub> PtCl <sub>2</sub>      | 7.8               | -953 (100)                                            | -1117 (300)                                           | 164                               |
| <i>cis</i> -( <i>n</i> -C <sub>4</sub> H <sub>9</sub> NH <sub>2</sub> ) <sub>2</sub> PtCl <sub>2</sub>      | 7.3               | -943 (100)                                            | -1117 (300)                                           | 174                               |
| <i>cis</i> -( <i>n</i> -C <sub>5</sub> H <sub>11</sub> NH <sub>2</sub> ) <sub>2</sub> PtCl <sub>2</sub>     | 7.6               | -956 (100)                                            | -1100 (320)                                           | 144                               |
| <i>cis</i> -( <i>n</i> -C <sub>6</sub> H <sub>13</sub> NH <sub>2</sub> ) <sub>2</sub> PtCl <sub>2</sub>     | 7.7               | -987 (80)                                             | -1149 (290)                                           | 162                               |
| <i>cis</i> -( <i>n</i> -C <sub>7</sub> H <sub>15</sub> NH <sub>2</sub> ) <sub>2</sub> PtCl <sub>2</sub>     | 7.8               | -1010 (90)                                            | -1171 (280)                                           | 161                               |
| <i>cis</i> -( <i>n</i> -C <sub>8</sub> H <sub>17</sub> NH <sub>2</sub> ) <sub>2</sub> PtCl <sub>2</sub>     | 7.4               | -987 (80)                                             | -1149 (290)                                           | 162                               |
| <i>cis</i> -( <i>i</i> -PrNH <sub>2</sub> ) <sub>2</sub> PtCl <sub>2</sub>                                  | -                 | -1166 (140)                                           | -1221 (0)                                             | 55                                |
| <i>cis</i> -( <i>i</i> -BuNH <sub>2</sub> ) <sub>2</sub> PtCl <sub>2</sub>                                  | 5.8               | -1021 (120)                                           | -1155 (0)                                             | 134                               |
| <i>cis</i> -( <i>i</i> -AmNH <sub>2</sub> ) <sub>2</sub> PtCl <sub>2</sub>                                  | 7.8               | -973 (250)                                            | -1125 (70)                                            | 152                               |
| <i>cis</i> -( <i>c</i> -C <sub>3</sub> H <sub>5</sub> NH <sub>2</sub> ) <sub>2</sub> PtCl <sub>2</sub>      | 12.4              | -1224 (160)                                           | -1280 (70)                                            | 56                                |
| <i>cis</i> -( <i>c</i> -C <sub>4</sub> H <sub>7</sub> NH <sub>2</sub> ) <sub>2</sub> PtCl <sub>2</sub>      | -                 | -944 (120)                                            | -1048 (10)                                            | 104                               |
| <i>cis</i> -( <i>c</i> -C <sub>5</sub> H <sub>9</sub> NH <sub>2</sub> ) <sub>2</sub> PtCl <sub>2</sub>      | -                 | -1022 (190)                                           | -1949 (130)                                           | 924                               |
| <i>cis</i> -( <i>c</i> -C <sub>6</sub> H <sub>11</sub> NH <sub>2</sub> ) <sub>2</sub> PtCl <sub>2</sub>     | -                 | -1103 (70)                                            | -1245 (0)                                             | 142                               |
| <i>cis</i> -( <i>c</i> -C <sub>7</sub> H <sub>13</sub> NH <sub>2</sub> ) <sub>2</sub> PtCl <sub>2</sub>     | -                 | -1181 (30)                                            | -1230 (0)                                             | 49                                |
| <i>cis</i> -( <i>c</i> -C <sub>8</sub> H <sub>15</sub> NH <sub>2</sub> ) <sub>2</sub> PtCl <sub>2</sub>     | -                 | -1103 (30)                                            | -1551 (80)                                            | 448                               |
| <i>cis</i> -(1-Adamantamine) <sub>2</sub> PtCl <sub>2</sub>                                                 | -                 | -1195 (0)                                             | -1902 (240)                                           | 707                               |
| <i>cis</i> -(C <sub>5</sub> H <sub>5</sub> N) <sub>2</sub> PtCl <sub>2</sub>                                | 5.7               | -1387 (80)                                            | -1668 (0)                                             | 281                               |
| <i>cis</i> -(C <sub>5</sub> H <sub>10</sub> NH) <sub>2</sub> PtCl <sub>2</sub>                              | 13.7              | -937 (90)                                             | -1216 (0)                                             | 279                               |
| <i>cis</i> -[(CH <sub>3</sub> ) <sub>2</sub> NH] <sub>2</sub> PtCl <sub>2</sub>                             | 9.3               | -1043 (90)                                            | -1298 (180)                                           | 255                               |
| <i>cis</i> -( <i>c</i> -C <sub>3</sub> H <sub>5</sub> NH <sub>2</sub> )(NH <sub>3</sub> )PtCl <sub>2</sub>  | 7.3               | -1042 (110)                                           | -1250 (0)                                             | 208                               |
| <i>cis</i> -( <i>c</i> -C <sub>4</sub> H <sub>7</sub> NH <sub>2</sub> )(NH <sub>3</sub> )PtCl <sub>2</sub>  | -                 | -1098 (10)                                            | -2107 (120)                                           | 1009                              |
| <i>cis</i> -( <i>c</i> -C <sub>5</sub> H <sub>9</sub> NH <sub>2</sub> )(NH <sub>3</sub> )PtCl <sub>2</sub>  | 16.9              | -1190 (10)                                            | -1332 (60)                                            | 142                               |
| <i>cis</i> -( <i>c</i> -C <sub>6</sub> H <sub>11</sub> NH <sub>2</sub> )(NH <sub>3</sub> )PtCl <sub>2</sub> | -                 | -1256 (0)                                             | -1808 (130)                                           | 552                               |
| <i>cis</i> -(Thiazole) <sub>2</sub> PtCl <sub>2</sub>                                                       | 7.1               | -1402 (60)                                            | -1889 (140)                                           | 487                               |

**Table S3.** Selected structural parameters (bond lengths in Å, bond angles in degrees) for *cis*-bis(amine) Pt(II) anticancer agents with carboxylato- and acetylacetonato- leaving ligands calculated at the GIAO-PBE0/SARC-ZORA(Pt) ∪ 6-31+G(d)(E) level in solution.

| Compound                                                                                       | $R_{\text{Pt-O}}$          | $R_{\text{Pt-N}}$   | $\angle\text{N-Pt-N}$ | $\angle\text{O-Pt-O}$ | Solvent            |
|------------------------------------------------------------------------------------------------|----------------------------|---------------------|-----------------------|-----------------------|--------------------|
| Carboplatin <sup>a</sup>                                                                       | 2.077 (2.075) <sup>b</sup> | 2.129 (2.120)       | 93.3 (91.3)           | 90.9 (90.4)           | DMF                |
|                                                                                                | 2.082 (2.092)              | 2.121 (2.108)       | 91.7 (89.9)           | 90.2 (89.5)           | water <sup>c</sup> |
|                                                                                                | <i>2.025<sup>d</sup></i>   | <i>2.021</i>        | <i>95.3</i>           | <i>90.5</i>           | <i>solid state</i> |
| Oxaliplatin <sup>e</sup>                                                                       | 2.089 (2.082)              | 2.126(2.118)        | 80.6 (80.9)           | 80.7(80.9)            | DMF                |
|                                                                                                | 2.102 (2.107)              | 2.113 (2.101)       | 80.8 (81.0)           | 80.3 (80.2)           | water <sup>c</sup> |
|                                                                                                | <i>2.021; 2.031</i>        | <i>2.011; 2.028</i> | <i>83.8</i>           | <i>82.8</i>           | <i>solid state</i> |
| <i>cis</i> -(NH <sub>3</sub> ) <sub>2</sub> Pt(OOCCH <sub>3</sub> ) <sub>2</sub>               | 2.115 (2.110)              | 2.110 (2.100)       | 89.1 (88.3)           | 82.0(82.8)            | DMF                |
|                                                                                                | 2.126 (2.120)              | 2.105 (2.097)       | 88.2 (87.9)           | 83.0 (81.1)           | water <sup>c</sup> |
| <i>cis</i> -(NH <sub>3</sub> ) <sub>2</sub> Pt(OOCC <sub>6</sub> H <sub>5</sub> ) <sub>2</sub> | 2.116 (2.112)              | 2.107 (2.097)       | 89.1 (88.1)           | 82.0 (82.8)           | DMF                |
|                                                                                                | (2.120)                    | (2.094)             | (88.0)                | (81.0)                | water <sup>c</sup> |
| (C <sub>5</sub> H <sub>10</sub> NH) <sub>2</sub> Pt(OOCCOO)                                    | 2.087; 2.102               | 2.148               | 95.1                  | 81.1                  | DMF                |
|                                                                                                | (2.087; 2.093)             | (2.140)             | (93.9)                | (81.2)                | DMF                |
|                                                                                                | 2.098                      | 2.138; 2.155        | 94.7                  | 80.9                  | water <sup>c</sup> |
|                                                                                                | (2.109; 2.120)             | (2.125)             | (92.6)                | (80.2)                | water              |
| (1,4-DACH)Pt(OOCCOO)                                                                           | 2.085 (2.081)              | 2.139 (2.130)       | 97.8 (97.6)           | 81.6(81.6)            | DMF                |
|                                                                                                | 2.099 (2.105)              | 2.127(2.117)        | 97.4 (97.4)           | 81.0 (80.8)           | water <sup>c</sup> |
| (1,4-DACH)Pt(CBDCA) <sup>f</sup>                                                               | 2.086 (2.084)              | 2.135 (2.127)       | 98.1 (98.1)           | 91.4 (90.9)           | DMF                |
|                                                                                                | 2.095 (2.102)              | 2.124 (2.117)       | 98.0 (97.9)           | 90.7 (89.7)           | water <sup>c</sup> |
| (1,4-DACH)Pt(OOCCH <sub>2</sub> COO)                                                           | 2.091 (2.087)              | 2.133 (2.126)       | 98.1 (98.0)           | 92.4 (91.6)           | DMF                |
|                                                                                                | 2.099 (2.105)              | 2.123 (2.115)       | 98.0 (97.9)           | 91.2 (90.6)           | water <sup>c</sup> |

<sup>a</sup> Carboplatin = *cis*-diammine(1,1-cyclobutanedicarboxylato)platinum(II). <sup>b</sup> Figures in parentheses are the structural parameters calculated in solution employing the SMD model. <sup>c</sup> Employing Gaussian03 package for calculations in aqueous solution. <sup>d</sup> Figures in italics are the experimentally determined structural parameters using X-Ray crystallography. <sup>e</sup> Oxaliplatin = (DACH)(oxalato)platinum(II). <sup>f</sup> CBDCA = 1,1-cyclobutanedicarboxylate.

**Table S4.** Selected structural parameters (bond lengths in Å, bond angles in degrees) for a series of diacetylbis(amine)platinum(II) complexes calculated at the GIAO-PBE0/SARC-ZORA(Pt) ∪ 6-31+G(d)(E) level in solution.

| Compound]                                                                                  | Pt-C         | Pt-N         | <C-Pt-C | <N-Pt-N | Solvent                         |
|--------------------------------------------------------------------------------------------|--------------|--------------|---------|---------|---------------------------------|
| Pt(OCMe) <sub>2</sub> (H <sub>2</sub> NEt) <sub>2</sub>                                    | 2.070        | 2.302        | 94.6    | 95.0    | CHCl <sub>3</sub>               |
| Pt(OCMe) <sub>2</sub> (H <sub>2</sub> N <sup>i</sup> Pr) <sub>2</sub>                      | 2.069; 2.071 | 2.310; 2.318 | 94.1    | 95.9    | CHCl <sub>3</sub>               |
|                                                                                            | 1.976; 1.985 | 2.176        | 89.1    | 88.0    | Solid state                     |
| Pt(OCMe) <sub>2</sub> (H <sub>2</sub> NCH <sub>2</sub> Ph) <sub>2</sub>                    | 2.071        | 2.301        | 94.8    | 95.1    | CHCl <sub>3</sub>               |
|                                                                                            | 1.979        | 2.164        | 91.8    | 92.7    | Solid state                     |
| Pt(OCMe) <sub>2</sub> (H <sub>2</sub> NCH <sub>2</sub> CH <sub>2</sub> Ph) <sub>2</sub>    | 2.070        | 2.302        | 94.8    | 94.6    | CHCl <sub>3</sub>               |
| Pt(OCMe) <sub>2</sub> (H <sub>2</sub> NCH <sub>2</sub> CH=CH <sub>2</sub> )                | 2.070        | 2.304        | 94.9    | 94.9    | CHCl <sub>3</sub>               |
| Pt(OCMe) <sub>2</sub> (H <sub>2</sub> NCy) <sub>2</sub>                                    | 2.070        | 2.325        | 93.7    | 95.7    | CHCl <sub>3</sub>               |
| Pt(OCMe) <sub>2</sub> (HNMe <sub>2</sub> ) <sub>2</sub>                                    | 2.059; 2.087 | 2.330; 2.334 | 91.8    | 91.5    | CH <sub>2</sub> Cl <sub>2</sub> |
| Pt(OCMe) <sub>2</sub> (HNEt <sub>2</sub> ) <sub>2</sub>                                    | 2.060; 2.090 | 2.354; 2.355 | 91.3    | 91.0    | CH <sub>2</sub> Cl <sub>2</sub> |
| Pt(OCMe) <sub>2</sub> (H <sub>2</sub> NCH <sub>2</sub> CH <sub>2</sub> NH <sub>2</sub> )   | 2.062; 2.071 | 2.299; 2.316 | 91.8    | 76.8    | CHCl <sub>3</sub>               |
| Pt(OCMe) <sub>2</sub> (Me <sub>2</sub> NCH <sub>2</sub> CH <sub>2</sub> NH <sub>2</sub> )  | 2.054; 2.082 | 2.308; 2.396 | 91.5    | 77.0    | CHCl <sub>3</sub>               |
| Pt(OCMe) <sub>2</sub> (MeNHCH <sub>2</sub> CH <sub>2</sub> NHMe)                           |              | 2.314; 2.333 | 91.8    | 78.0    | CHCl <sub>3</sub>               |
| )                                                                                          | 2.062; 2.073 |              |         |         |                                 |
| Pt(OCMe) <sub>2</sub> (Me <sub>2</sub> NCH <sub>2</sub> CH <sub>2</sub> NMe <sub>2</sub> ) | 2.073        | 2.347; 2.348 | 85.3    | 79.4    | CH <sub>2</sub> Cl <sub>2</sub> |

<sup>a</sup> Figures in parentheses are the structural parameters calculated in solution employing the SMD model.

**Table S5.** Selected structural parameters (bond lengths in Å, bond angles in degrees) for octahedral Pt(IV) anticancer agents calculated at the GIAO-PBE0/SARC-ZORA(Pt) ∪ 6-31+G(d)(E) level in solution.

| Compound]                                                                                                          | Pt-O                            | Pt-Cl                                          | Pt-N                                           | <O-Pt-O                        | <Cl-Pt-Cl                  | <N-Pt-N                    | Solvent                       |
|--------------------------------------------------------------------------------------------------------------------|---------------------------------|------------------------------------------------|------------------------------------------------|--------------------------------|----------------------------|----------------------------|-------------------------------|
| <i>cct</i> -[Pt(NH <sub>3</sub> ) <sub>2</sub> Cl <sub>2</sub> (OOCH) <sub>2</sub> ]                               | 2.059 (2.063) <sup>a</sup>      | 2.359 (2.367)                                  | 2.129 (2.116)                                  | 176.6 (175.8)                  | 94.3 (95.1)                | 94.3 (93.1)                | DMSO                          |
| <i>cct</i> -<br>[Pt(NH <sub>3</sub> )(Cha)Cl <sub>2</sub> (OOCCH <sub>3</sub> ) <sub>2</sub> ](Satraplatin)        | 2.063 (2.064)<br>2.01; 2.06     | 2.360 (2.369)                                  | 2.125 (2.117)                                  | 170.7 (171.0)                  | 91.4 (91.3)                | 97.2 (96.9)                | DMSO                          |
| <i>cct</i> -[Pt(NH <sub>3</sub> ) <sub>2</sub> Cl <sub>2</sub> (OOCCH <sub>3</sub> ) <sub>2</sub> ]                | 2.064<br>(2.065; 2.067)         | 2.308; 2.312<br>2.359; 2.385<br>(2.369; 2.390) | 2.067; 2.073<br>2.100; 2.121<br>(2.097; 2.109) | 174.7<br>171.0<br>170.7        | 90.39<br>91.7<br>91.8      | 94.3<br>92.8<br>91.8       | Solid state<br>water<br>water |
| <i>cct</i> -[Pt(NH <sub>3</sub> ) <sub>2</sub> Cl <sub>2</sub> (OOCF <sub>3</sub> ) <sub>2</sub> ]                 | 2.030                           | 2.318                                          | 2.049                                          | 176.7                          | 91.23                      | 90.7                       | Solid state                   |
| <i>cct</i> -[Pt(NH <sub>3</sub> ) <sub>2</sub> Cl <sub>2</sub> (OOCCHCl <sub>2</sub> ) <sub>2</sub> ]              | 2.061 (2.061)                   | 2.353 (2.363)                                  | 2.116 (2.110)                                  | 171.2 (170.7)                  | 91.6 (91.7)                | 93.1 (92.3)                | water                         |
| <i>cct</i> -[Pt(NH <sub>3</sub> ) <sub>2</sub> Cl <sub>2</sub> (OOCCHCl <sub>2</sub> ) <sub>2</sub> ] (Mitaplatin) | 2.052 (2.052)                   | 2.356 (2.363)                                  | 2.117 (2.108)                                  | 173.8 (174.1)                  | 94.4 (94.8)                | 93.3 (91.0)                | DMSO                          |
| Pt(en)Cl <sub>2</sub> (OOCCH <sub>3</sub> ) <sub>2</sub>                                                           | 2.063 (2.063)                   | 2.366 (2.375)                                  | 2.099 (2.096)                                  | 171.4 (171.7)                  | 92.2 (92.4)                | 82.3 (82.2)                | DMSO                          |
| Pt(en)Cl <sub>2</sub> (OOCF <sub>3</sub> ) <sub>2</sub>                                                            | 2.061 (2.061)                   | 2.360 (2.371)                                  | 2.114 (2.11)                                   | 171.7 (171.3)                  | 91.9 (91.9)                | 82.2 (82.2)                | water                         |
| Pt(1,2-DACH)Cl <sub>2</sub> (OOCCH <sub>3</sub> ) <sub>2</sub>                                                     | 2.063 (2.063)<br>2.036          | 2.366 (2.375)<br>2.331                         | 2.103 (2.100)<br>2.01                          | 172.0 (172.2)<br>167.9         | 91.8 (91.7)<br>94.1        | 81.5 (81.4)<br>84.0        | acetone<br>Solid state        |
| Pt(1,4-DACH)(OOCCH <sub>3</sub> ) <sub>2</sub> Cl <sub>2</sub>                                                     | 2.064 (2.066)<br>2.007; 2.010   | 2.376 (2.384)<br>2.315; 2.322                  | 2.133 (2.129)<br>2.037; 2.067                  | 168.1 (168.2)<br>174.2         | 97.8 (98.1)<br>91.9        | 97.0 (96.8)<br>97.4        | acetone<br>Solid state        |
| <i>cct</i> -{Pt(NH <sub>3</sub> ) <sub>2</sub> Cl <sub>2</sub> [OOCNH( <sup>t</sup> Bu)] <sub>2</sub> }            | 2.055 (2.052)<br>2.0062; 2.0117 | 2.371 (2.376)<br>2.3145; 2.3326                | 2.107 (2.102)<br>2.037; 2.037                  | 173.9 (174.1)<br>174.06        | 95.3 (95.5)<br>92.57       | 91.7 (90.7)<br>90.0        | DMSO<br>Solid state           |
| <i>cct</i> -{Pt(NH <sub>3</sub> ) <sub>2</sub> Cl <sub>2</sub> [OOCNH( <i>c</i> -pentyl)] <sub>2</sub> }           | 2.050 (2.050)<br>1.9970; 2.0088 | 2.362 (2.370)<br>2.3170; 2.3324                | 2.104 (2.096)<br>2.0423; 2.038                 | 171.3 (171.7)<br>174.22        | 94.8 (95.6)<br>91.99       | 93.1 (91.5)<br>90.02       | DMSO<br>Solid state           |
| <i>cct</i> -{Pt(NH <sub>3</sub> ) <sub>2</sub> Cl <sub>2</sub> [OOCNH( <i>c</i> -hexyl)] <sub>2</sub> }            | 2.049 (2.050)<br>2.001; 2.026   | 2.362 (2.370)<br>2.3075; 2.3170                | 2.103 (2.096)<br>2.041; 2.042                  | 171.5 (171.5)<br>174.17        | 94.9 (95.2)<br>91.48       | 93.0 (91.2)<br>93.17       | DMSO<br>Solid state           |
| <i>cct</i> -[Pt(NH <sub>3</sub> ) <sub>2</sub> Cl <sub>2</sub> (OOCNPh) <sub>2</sub> ]                             | 2.056 (2.056)<br>1.993; 1.995   | 2.374 (2.378)<br>2.3202; 3.3272                | 2.105 (2.102)<br>1.993; 1.995                  | 173.8 (173.7)<br>174.94        | 93.4 (93.0)<br>92.68       | 90.1 (90.3)<br>92.21       | DMSO                          |
| Pt(1,2-DACH)(OH) <sub>2</sub> (oxalate)                                                                            | 2.042 (2.044)                   | 2.053 (2.056) <sup>b</sup>                     | 2.085 (2.082)                                  | 174.5 (174.9)                  | 81.8 (81.7) <sup>c</sup>   | 81.2 (81.2)                | DMF                           |
| <i>cct</i> -[Pt(NH <sub>3</sub> ) <sub>2</sub> Cl <sub>2</sub> (OH) <sub>2</sub> ] (Oxoplatin)                     | 2.046 (2.051)<br>2.008          | 2.367 (2.373)<br>2.317                         | 2.104 (2.101)<br>2.056                         | 172.2 (173.9)<br>176.9         | 92.1 (92.2)<br>90.48       | 92.5 (91.2)<br>94.3        | water<br>Solid state          |
| <i>cct</i> -[Pt( <i>i</i> PrNH <sub>2</sub> ) <sub>2</sub> Cl <sub>2</sub> (OH) <sub>2</sub> ] (Iproplatin)        | 2.042 (2.047)                   | 2.382 (2.388)                                  | 2.119 (2.113)                                  | 174.3 (176.8)                  | 93.1 (93.3)                | 94.6 (92.5)                | water                         |
| Pt(hpip)Cl <sub>2</sub> (OH) <sub>2</sub>                                                                          | 2.047 (2.053)                   | 2.383 (2.390)                                  | 2.133 (2.131)                                  | 178.8 (179.2)                  | 91.9 (91.6)                | 73.8 (73.7)                | water                         |
| Pt(mhpi)Cl <sub>2</sub> (OH) <sub>2</sub>                                                                          | 2.047<br>(2.053)                | 2.387<br>(2.389; 2.395)                        | 2.122; 2.167<br>(2.121; 2.167)                 | 178.7<br>(178.9)               | 90.2<br>(90.0)             | 74.7<br>(74.7)             | water<br>water                |
| Pt(dmhpip)Cl <sub>2</sub> (OH) <sub>2</sub>                                                                        | 2.046; 2.049<br>(2.053)         | 2.389<br>(2.397)                               | 2.163<br>(2.163)                               | 178.7<br>(170.3)               | 87.3<br>(87.4)             | 75.5<br>(75.5)             | water<br>water                |
| Pt(1,4-DACH)(OH) <sub>2</sub> Cl <sub>2</sub>                                                                      | 2.043 (2.048)<br>2.043 (2.044)  | 2.385 (2.389)<br>2.385 (2.393)                 | 2.111 (2.122)<br>2.111 (2.106)                 | 174.5 (176.9)<br>174.6 (174.6) | 93.0 (92.5)<br>93.0 (92.8) | 98.0 (97.9)<br>98.1 (97.9) | water<br>DMF                  |



<sup>a</sup> Figures in parentheses are the structural parameters calculated in solution employing the SMD model.

**Table S6** Cartesian Coordinates and energies of antitumour agents (in Hartrees)

***cis*-(NH<sub>3</sub>)<sub>2</sub>PtCl<sub>2</sub> (DMF)**

Pt, 0, 0., 0., 0.149007493  
Cl, 0, 0.0241350672, 1.7574695274, -1.4847976822  
N, 0, -0.0134432292, -1.5398176075, 1.6299584327  
Cl, 0, -0.0241350672, -1.7574695274, -1.4847976822  
N, 0, 0.0134432292, 1.5398176075, 1.6299584327  
H, 0, -0.7980144193, -1.4701828722, 2.2753765455  
H, 0, 0.8403748279, -1.5529070235, 2.1849257384  
H, 0, -0.0836484936, -2.4397386096, 1.1559832194  
H, 0, 0.7980144193, 1.4701828722, 2.2753765455  
H, 0, -0.8403748279, 1.5529070235, 2.1849257384  
H, 0, 0.0836484936, 2.4397386096, 1.1559832194

Sum of electronic and zero-point Energies= -18347.973183  
Sum of electronic and thermal Energies= -18347.963814  
Sum of electronic and thermal Enthalpies= -18347.962870  
Sum of electronic and thermal Free Energies= -18348.008856

***trans*-(NH<sub>3</sub>)<sub>2</sub>PtCl<sub>2</sub> (DMF)**

Pt, 0, 0., 0., 0.0032282075  
Cl, 0, 0., 0., -2.4118895839  
N, 0, 0., -2.1193018823, 0.0025074443  
Cl, 0, 0., 0., 2.4197401204  
N, 0, 0., 2.1193018823, 0.0025074443  
H, 0, -0.8203027348, -2.489958261, 0.4784639321  
H, 0, 0.8203027348, -2.489958261, 0.4784639321  
H, 0, 0., -2.4817664948, -0.9497746859  
H, 0, 0.8203027348, 2.489958261, 0.4784639321  
H, 0, -0.8203027348, 2.489958261, 0.4784639321  
H, 0, 0., 2.4817664948, -0.9497746859

Sum of electronic and zero-point Energies= -18347.978195  
Sum of electronic and thermal Energies= -18347.968759  
Sum of electronic and thermal Enthalpies= -18347.967814  
Sum of electronic and thermal Free Energies= -18348.014041

***cis*-(CH<sub>3</sub>NH<sub>2</sub>)<sub>2</sub>PtCl<sub>2</sub> (DMF)**

Pt, 0, 0.0135955385, -0.0714416681, -0.0826305323  
Cl, 0, 1.7506278262, -1.6561209182, 0.4123910774  
N, 0, -1.5350473753, 1.3368490363, -0.5534681968  
Cl, 0, -1.7586380662, -1.6406180441, 0.3303314639  
N, 0, 1.5932808033, 1.3200567111, -0.4908417389

C,0,-2.1886538017,1.9559065683,0.6141818771  
C,0,2.0738492488,2.0966820953,0.6659107375  
H,0,-1.2004988019,2.0636888947,-1.1840560491  
H,0,-2.225448796,0.8043577002,-1.0818106  
H,0,1.340496788,1.9505160404,-1.2502707433  
H,0,2.3555171541,0.7450108476,-0.8489039207  
H,0,-2.9995864685,2.6218536757,0.2995223701  
H,0,-1.4518819192,2.5279943261,1.180923753  
H,0,-2.5922672338,1.1655699747,1.2489249748  
H,0,2.9072460032,2.7474470789,0.3794719385  
H,0,2.4048810374,1.4034124103,1.4408747265  
H,0,1.259553063,2.7080042708,1.0588658623

Sum of electronic and zero-point Energies= -18426.423652  
Sum of electronic and thermal Energies= -18426.411699  
Sum of electronic and thermal Enthalpies= -18426.410755  
Sum of electronic and thermal Free Energies= -18426.464117

***cis*-(C<sub>2</sub>H<sub>5</sub>NH<sub>2</sub>)<sub>2</sub>PtCl<sub>2</sub> (DMF)**

Pt,0,-0.0050357849,-0.410889578,-0.0957540112  
Cl,0,1.8605855935,-1.8628665088,0.3468591473  
N,0,-1.659875568,0.8824331112,-0.5267301523  
Cl,0,-1.6509193255,-2.0882453673,0.4144787615  
N,0,1.4528545493,1.0787008323,-0.6025099441  
C,0,-2.0530143703,1.8219809308,0.5452859762  
C,0,-3.2886702047,2.6320728536,0.1888911986  
C,0,2.0523827409,1.8007721541,0.5411601896  
C,0,3.1087660918,2.8051500154,0.1112264966  
H,0,-1.5061956477,1.3936189974,-1.3959214619  
H,0,-2.4323622938,0.2409573167,-0.7129075963  
H,0,1.0772061252,1.7478777425,-1.2742243682  
H,0,2.1862624784,0.5698035409,-1.0971014404  
H,0,-1.2006573742,2.4796817301,0.7379524447  
H,0,-2.2213209216,1.2268013987,1.4470365209  
H,0,-3.5420362539,3.3045760326,1.0155240622  
H,0,-4.1517952937,1.9816095489,0.0069443462  
H,0,-3.1212668908,3.2441740194,-0.7047932984  
H,0,2.4767192703,1.0431497095,1.2052603387  
H,0,1.2409789528,2.2968215768,1.0812853423  
H,0,3.5285821948,3.3007312226,0.9933244249  
H,0,2.6847856242,3.5787212043,-0.5395680776  
H,0,3.9307563078,2.3146605163,-0.4228438991

Sum of electronic and zero-point Energies= -18504.904499  
Sum of electronic and thermal Energies= -18504.889934  
Sum of electronic and thermal Enthalpies= -18504.888990  
Sum of electronic and thermal Free Energies= -18504.948856

***cis-(n-C<sub>3</sub>H<sub>7</sub>NH<sub>2</sub>)<sub>2</sub>PtCl<sub>2</sub> (DMF)***

Pt, 0, 0.0109824574, -0.5700456724, -0.1423066507  
Cl, 0, 1.7423368218, -2.194995895, 0.2319216769  
N, 0, -1.5248034695, 0.8796789573, -0.5168108876  
Cl, 0, -1.7704029308, -2.1287790557, 0.2761579581  
N, 0, 1.5896680224, 0.8230019486, -0.5566148633  
C, 0, -2.1174760509, 1.4928575278, 0.6924595574  
C, 0, -3.1980734421, 2.5260702287, 0.3911356924  
C, 0, 2.0123261393, 1.6618047434, 0.5854460861  
C, 0, 3.1587747404, 2.6139607043, 0.2602544308  
C, 0, -4.4238554691, 1.9632635655, -0.320778291  
C, 0, 4.4605658842, 1.9192495833, -0.1250641397  
H, 0, -1.1942971388, 1.6099803877, -1.1477097411  
H, 0, -2.2443576975, 0.3699395355, -1.0290543364  
H, 0, 1.3579681426, 1.413252125, -1.355784265  
H, 0, 2.3662448139, 0.2330715034, -0.8564361954  
H, 0, -1.3029688014, 1.9522499521, 1.2599907385  
H, 0, -2.5205579221, 0.6731628986, 1.295213286  
H, 0, -3.4997041043, 2.9603151971, 1.3530739958  
H, 0, -2.7638557384, 3.3489958002, -0.1936242985  
H, 0, 2.2944520115, 0.9793191111, 1.3936186532  
H, 0, 1.1368058919, 2.2260398514, 0.9194419736  
H, 0, 3.3224009044, 3.231213555, 1.1530283941  
H, 0, 2.8462853705, 3.3033086115, -0.5364089967  
H, 0, -5.1954886244, 2.7333361727, -0.4266205582  
H, 0, -4.8593533278, 1.1283191652, 0.2417730845  
H, 0, -4.1898917955, 1.6039621558, -1.330176354  
H, 0, 5.2645010082, 2.651620119, -0.2550019789  
H, 0, 4.3737260828, 1.3685073386, -1.0693865013  
H, 0, 4.7756692214, 1.2108068843, 0.6508965303

Sum of electronic and zero-point Energies= -18583.375561  
Sum of electronic and thermal Energies= -18583.358428  
Sum of electronic and thermal Enthalpies= -18583.357484  
Sum of electronic and thermal Free Energies= -18583.424226

***cis-(n-C<sub>4</sub>H<sub>9</sub>NH<sub>2</sub>)<sub>2</sub>PtCl<sub>2</sub> (DMF)***

Pt, 0, 0.0170460375, -0.8777703454, -0.1138410822  
Cl, 0, 1.7779847957, -2.4915408325, 0.1887153956  
N, 0, -1.5436435988, 0.556000187, -0.4245585678  
Cl, 0, -1.7346447325, -2.463428141, 0.3275385176  
N, 0, 1.573902687, 0.5355947901, -0.5375885217  
C, 0, -2.0980330068, 1.1836964494, 0.795243195  
C, 0, -3.1786569836, 2.2210848173, 0.5083732236  
C, 0, 1.9621893594, 1.4140862473, 0.5872927181  
C, 0, 3.120988829, 2.3525104668, 0.2676860932

C,0,-4.4375723876,1.669337024,-0.157141276  
C,0,4.45074089,1.6540254532,-0.00768657  
C,0,5.5984792136,2.6426633063,-0.1815234815  
C,0,-5.5174097065,2.7332390352,-0.3221807883  
H,0,-1.2448885491,1.2791806672,-1.0792451618  
H,0,-2.2779892907,0.0329472747,-0.9010302394  
H,0,1.347660663,1.0988607215,-1.357391997  
H,0,2.3645359016,-0.0508772877,-0.80619225  
H,0,-1.2665059842,1.6452081217,1.3354265716  
H,0,-2.4883971066,0.3731701252,1.4183505416  
H,0,-3.4496494055,2.6781783726,1.4701704101  
H,0,-2.7554262359,3.0299319875,-0.1056070519  
H,0,2.2150182005,0.7616445721,1.4292308434  
H,0,1.0777813108,1.9913100393,0.871817579  
H,0,3.2382020131,3.0216351108,1.1314342585  
H,0,2.8509852195,2.9952357075,-0.5831494984  
H,0,-4.8284488734,0.8354410258,0.4428651072  
H,0,-4.196366905,1.2543195066,-1.1458079693  
H,0,4.3761585165,1.033831626,-0.9118352913  
H,0,4.6770373979,0.9687507042,0.8214652444  
H,0,6.5428822966,2.124966725,-0.3834176111  
H,0,5.7349751115,3.2492337657,0.7222902545  
H,0,5.4069702741,3.3277534331,-1.0166310318  
H,0,-6.4106886774,2.3226037173,-0.8060382707  
H,0,-5.1579628432,3.5679682692,-0.9366852006  
H,0,-5.8198924305,3.1416803571,0.6499179077

Sum of electronic and zero-point Energies= -18661.848804  
Sum of electronic and thermal Energies= -18661.829018  
Sum of electronic and thermal Enthalpies= -18661.828074  
Sum of electronic and thermal Free Energies= -18661.901114

***cis*-(*n*-C<sub>5</sub>H<sub>11</sub>NH<sub>2</sub>)<sub>2</sub>PtCl<sub>2</sub> (DMF)**

Pt,0,-0.0035809205,-0.728069298,0.0788010637  
Cl,0,1.7808322992,-2.2159918402,0.7013118829  
N,0,-1.5794102136,0.5977492879,-0.5212024537  
Cl,0,-1.7348636739,-2.3029893708,0.6274289931  
N,0,1.5345934969,0.6709334555,-0.4445288009  
C,0,-2.084120938,1.5017249991,0.5346096387  
C,0,-3.2038066352,2.4271921954,0.065393197  
C,0,2.0863904042,1.451182719,0.6848955461  
C,0,3.1829012744,2.429963668,0.2730894781  
C,0,-4.4744377191,1.7362645148,-0.433719382  
C,0,4.4271128485,1.8054448095,-0.3621267607  
C,0,-5.1792285769,0.8641249242,0.6032804515  
C,0,5.1705081227,0.8128910277,0.5294504652  
C,0,6.4658211759,0.3183502986,-0.1052912847  
C,0,-6.4985776695,0.2995547836,0.0877111745

H, 0, -1.3110322099, 1.138241818, -1.3437764306  
H, 0, -2.3269339642, -0.0253778793, -0.8273339315  
H, 0, 1.2268703664, 1.3041950283, -1.1828198879  
H, 0, 2.2714087933, 0.098319323, -0.8560606604  
H, 0, -1.2373104748, 2.0962111344, 0.8898942187  
H, 0, -2.4080542685, 0.8689884382, 1.3657170412  
H, 0, -3.4555250996, 3.0795267663, 0.91300174  
H, 0, -2.8135344414, 3.0864500723, -0.7226038837  
H, 0, 2.4487314092, 0.7283066873, 1.4207854234  
H, 0, 1.2561056532, 1.9954480306, 1.1442943398  
H, 0, 3.4761632206, 2.9800264773, 1.1779616775  
H, 0, 2.7566902919, 3.1751659253, -0.4131799688  
H, 0, -5.1701290798, 2.5168948296, -0.7715518588  
H, 0, -4.2568043232, 1.1353268164, -1.3296874694  
H, 0, 5.1116623059, 2.6213787052, -0.6326093814  
H, 0, 4.1677919583, 1.3179596839, -1.3142843363  
H, 0, -5.3607232758, 1.4584066054, 1.5104508648  
H, 0, -4.5283089813, 0.0327065504, 0.9069634407  
H, 0, 4.52874723, -0.0502205461, 0.7541517752  
H, 0, 5.3909579076, 1.2907257593, 1.4949655729  
H, 0, 6.9823711933, -0.3977988417, 0.5439741484  
H, 0, 7.1533309607, 1.1511332522, -0.2995550325  
H, 0, 6.2702010962, -0.1805725867, -1.0628750887  
H, 0, -6.9875465568, -0.3283242871, 0.8412977927  
H, 0, -6.3412664309, -0.3152327294, -0.8074933129  
H, 0, -7.1943155554, 1.1044477924, -0.1806220014

*cis*-(*n*-C<sub>6</sub>H<sub>13</sub>NH<sub>2</sub>)<sub>2</sub>PtCl<sub>2</sub> (DMF)

Pt, 0, 0.0408302748, -1.3383101321, -0.1553895198  
Cl, 0, 1.6898612901, -3.0934304696, -0.1094202968  
N, 0, -1.4193868234, 0.23365767, -0.2213013268  
Cl, 0, -1.8285588954, -2.8531655191, -0.0497250237  
N, 0, 1.7028144618, 0.0046334834, -0.3166110678  
C, 0, -1.9858836188, 0.6403443805, 1.0835966138  
C, 0, -3.0278161112, 1.7488595254, 0.9721838344  
C, 0, 1.9568648793, 0.9298281858, 0.8075406632  
C, 0, 3.1898119312, 1.8049712181, 0.6039948804  
C, 0, -4.2928244865, 1.3576650398, 0.2116664702  
C, 0, 4.5078821386, 1.0324270213, 0.5737423885  
C, 0, 5.7493515424, 1.9249757953, 0.5296746877  
C, 0, -5.3402908364, 2.4676058885, 0.1939594071  
C, 0, 5.901304346, 2.7422510772, -0.7516878779  
C, 0, -6.6077907831, 2.0901931367, -0.5674845795  
C, 0, 7.1998895608, 3.5408712974, -0.7868413484  
C, 0, -7.6459943717, 3.2065218841, -0.5864884659  
H, 0, -1.0579736528, 1.0525160638, -0.7109988587  
H, 0, -2.1621461876, -0.1399686446, -0.8116828967  
H, 0, 1.6322969862, 0.529511478, -1.1889188215  
H, 0, 2.4964361585, -0.6270150594, -0.432661644

H,0,-1.1544134157,0.9629456124,1.7170516346  
H,0,-2.4170833175,-0.2580941357,1.5355885564  
H,0,-3.2969990813,2.0440632837,1.9956564216  
H,0,-2.5694707084,2.6349825896,0.5086032198  
H,0,2.0563763031,0.3206419635,1.7117507256  
H,0,1.0687043511,1.5570036097,0.9278255372  
H,0,3.2147415249,2.5282526683,1.4310628775  
H,0,3.0618163606,2.3926103877,-0.3152908746  
H,0,-4.724932084,0.4545020166,0.6677246306  
H,0,-4.0485842366,1.0932955249,-0.8279063567  
H,0,4.535110617,0.3558001927,-0.2932922212  
H,0,4.5603984858,0.3931903086,1.4667132967  
H,0,6.6396119841,1.2911129358,0.6493931333  
H,0,5.7388092028,2.6040420621,1.3957986592  
H,0,-4.903150282,3.372266841,-0.2550551387  
H,0,-5.6036185293,2.7349843533,1.2283757024  
H,0,5.0523246548,3.4300188424,-0.8626049786  
H,0,5.8632428679,2.0639500848,-1.6167410925  
H,0,-7.045495897,1.1882789478,-0.1160811895  
H,0,-6.3420856453,1.8181213857,-1.599164481  
H,0,7.2911491744,4.1188959026,-1.7138391881  
H,0,8.0725075483,2.8790534246,-0.7181982258  
H,0,7.2522907633,4.2460028812,0.0523739993  
H,0,-8.5452108935,2.9091575339,-1.1385444016  
H,0,-7.2453755131,4.1101533919,-1.0630713622  
H,0,-7.9537000369,3.4774110702,0.4313658985

Sum of electronic and zero-point Energies= -18818.794830  
Sum of electronic and thermal Energies= -18818.769603  
Sum of electronic and thermal Enthalpies= -18818.768659  
Sum of electronic and thermal Free Energies= -18818.856269

***cis-(n-C<sub>7</sub>H<sub>13</sub>NH<sub>2</sub>)<sub>2</sub>PtCl<sub>2</sub> (DMF)***

Pt,0,0.0723507946,-1.5931578893,-0.2352041571  
Cl,0,1.7171058072,-3.3525193293,-0.228321609  
N,0,-1.3848753521,-0.0194036926,-0.2760777579  
Cl,0,-1.8016383339,-3.1058957995,-0.2641839043  
N,0,1.743971872,-0.2486578409,-0.236250595  
C,0,-1.9904392553,0.3298449373,1.0279696971  
C,0,-3.0232215497,1.4486338328,0.9360060619  
C,0,1.9024973943,0.6591897833,0.9188265768  
C,0,3.1602211073,1.5196583598,0.8444538812  
C,0,-4.2667133639,1.1007673202,0.121057158  
C,0,4.4651248334,0.7294113723,0.9311854399  
C,0,5.717238751,1.6051677697,1.0054346391  
C,0,-5.3037960365,2.2211603366,0.1157410284  
C,0,5.9951943562,2.4244312691,-0.2530255643  
C,0,-6.5492398692,1.8750451799,-0.6971435184  
C,0,7.3060433468,3.2033770558,-0.1828818611

C,0,7.584533193,4.0171558984,-1.4417785452  
C,0,-7.5695666252,3.0090214829,-0.8090235823  
C,0,-8.204751594,3.4143686212,0.517970812  
H,0,-1.0100791023,0.819570978,-0.7193446628  
H,0,-2.1094986639,-0.3667941969,-0.9038718148  
H,0,1.7506170863,0.2885690232,-1.1038521795  
H,0,2.5427908865,-0.8818961354,-0.2936230718  
H,0,-1.1780001978,0.6178248765,1.7015404661  
H,0,-2.4395066656,-0.586150628,1.4238953036  
H,0,-3.321486745,1.69903841,1.9633418887  
H,0,-2.5465588307,2.3518306943,0.5269955671  
H,0,1.9081724782,0.0384502286,1.8206611394  
H,0,1.0157706546,1.2983071375,0.9627796479  
H,0,3.1151264143,2.233752937,1.6786219891  
H,0,3.1282688963,2.1186937176,-0.0757962248  
H,0,-4.7206747034,0.1842994101,0.5266681531  
H,0,-3.9919848483,0.8753541334,-0.920098702  
H,0,4.5629133681,0.0560515292,0.0666748603  
H,0,4.4268923747,0.0858669366,1.8218133122  
H,0,6.5836388332,0.9579438333,1.2027040319  
H,0,5.636134609,2.28017469,1.8708472005  
H,0,-4.8470049858,3.1355199639,-0.2930720273  
H,0,-5.5823781962,2.4531295727,1.1530728408  
H,0,5.1724683251,3.1306262847,-0.4348245461  
H,0,6.020817555,1.7512527222,-1.1240058604  
H,0,-7.036499108,0.9922389252,-0.2555811094  
H,0,-6.2381387992,1.5780914064,-1.7093707468  
H,0,8.1342491092,2.5014935187,-0.0081055499  
H,0,7.282643916,3.8721510557,0.6897022526  
H,0,8.5310330223,4.5651195297,-1.3656225415  
H,0,6.7882749925,4.7502843704,-1.6227174555  
H,0,7.6446336193,3.3688687054,-2.325186723  
H,0,-8.3621581141,2.7000006308,-1.5041591681  
H,0,-7.0863877899,3.8844675853,-1.2671748299  
H,0,-8.974770355,4.1804473952,0.3687483855  
H,0,-7.4664359416,3.8236491249,1.2171340202  
H,0,-8.6815025699,2.5532839664,1.004179955

|                                              |               |
|----------------------------------------------|---------------|
| Sum of electronic and zero-point Energies=   | -18897.266770 |
| Sum of electronic and thermal Energies=      | -18897.238936 |
| Sum of electronic and thermal Enthalpies=    | -18897.237992 |
| Sum of electronic and thermal Free Energies= | -18897.332531 |

***cis*-(*n*-C<sub>8</sub>H<sub>13</sub>NH<sub>2</sub>)<sub>2</sub>PtCl<sub>2</sub> (DMF)**

Pt,0,0.0414849561,-1.905184476,-0.1452147945  
Cl,0,1.6472871556,-3.6989338898,-0.0956339065  
N,0,-1.3725799351,-0.2948021443,-0.2276756118  
Cl,0,-1.862154104,-3.3804064291,-0.1401301905  
N,0,1.7340810348,-0.5915359991,-0.1700221884



C,0,-2.0014318698,0.0743865568,1.0598646263  
C,0,-3.0234411101,1.199789869,0.9351843772  
C,0,2.0277055562,0.1370472177,1.0824557426  
C,0,3.284977398,0.9976180419,1.0072968203  
C,0,-4.2556538249,0.8492707432,0.1043439387  
C,0,4.5749830813,0.2039349352,0.802751599  
C,0,5.8473907804,1.0374745648,0.9632749465  
C,0,-5.2899398067,1.9718652959,0.0755866692  
C,0,6.0230492916,2.1403841049,-0.0783494454  
C,0,-6.5224196554,1.6233284578,-0.7562122738  
C,0,7.3486563477,2.8839959464,0.05948604  
C,0,7.5375339682,3.9912254163,-0.973642538  
C,0,-7.5386455559,2.7577672771,-0.8944005145  
C,0,-8.2152851313,3.172897186,0.4104182576  
C,0,-9.2828488197,4.242224716,0.2042749433  
C,0,8.8655813838,4.7255448918,-0.8256395097  
H,0,-0.9626820006,0.5332682591,-0.6604624346  
H,0,-2.090019336,-0.6218564818,-0.8743054804  
H,0,1.6646425633,0.0651733684,-0.9476632518  
H,0,2.5102533714,-1.214834738,-0.3958371697  
H,0,-1.199667826,0.3635369445,1.7455011807  
H,0,-2.466196028,-0.8330702498,1.4571590466  
H,0,-3.3373133572,1.4655966127,1.9539837732  
H,0,-2.5335429428,2.0940901052,0.5225120799  
H,0,2.1183317512,-0.6120813943,1.8756127014  
H,0,1.159339129,0.7604235587,1.3144994782  
H,0,3.3497916907,1.5551233698,1.9523688144  
H,0,3.1602344374,1.748382243,0.2151445432  
H,0,-4.7180379842,-0.062954638,0.510023203  
H,0,-3.9663260921,0.6152715805,-0.9309975388  
H,0,4.5835078468,-0.2592911931,-0.1950900328  
H,0,4.5993270303,-0.6221394416,1.5281941937  
H,0,6.7144295531,0.3634779283,0.9136073174  
H,0,5.8622256341,1.4815509279,1.970106444  
H,0,-4.8247865011,2.8830898058,-0.3307616063  
H,0,-5.5848865523,2.2101483084,1.1069069996  
H,0,5.1992331486,2.8644506824,-0.0035178845  
H,0,5.9559550559,1.7003981775,-1.0853968074  
H,0,-7.0183660041,0.7434832619,-0.3186390873  
H,0,-6.1937433138,1.319551853,-1.7607960068  
H,0,8.1786987315,2.1658297404,-0.0238656468  
H,0,7.4192220871,3.3161322347,1.069485713  
H,0,6.7092266406,4.709578066,-0.8894034206  
H,0,7.4667605732,3.5597377633,-1.9826290633  
H,0,-8.3159909364,2.4498175677,-1.6090681254  
H,0,-7.0450654794,3.6348409049,-1.3409050008  
H,0,-7.464673037,3.544635325,1.1206148267  
H,0,-8.6683155773,2.2862246442,0.8780848395  
H,0,-9.7560919889,4.5270109169,1.1513469097  
H,0,-10.0723288398,3.8874639722,-0.4704783164

H,0,-8.8521081105,5.1491687812,-0.238952022  
H,0,8.9757567152,5.5144175978,-1.5790067264  
H,0,9.7123226223,4.0365524954,-0.9377585829  
H,0,8.9492781849,5.1943808573,0.1630431534

Sum of electronic and zero-point Energies= -18975.740169  
Sum of electronic and thermal Energies= -18975.709613  
Sum of electronic and thermal Enthalpies= -18975.708669  
Sum of electronic and thermal Free Energies= -18975.810309

***cis-(i-PrNH<sub>2</sub>)<sub>2</sub>PtCl<sub>2</sub>*** (DMF)

Pt,0,0.0792977142,-0.6131741059,-0.2121089049  
Cl,0,2.111402409,-1.867778905,0.1235614013  
N,0,-1.7620203809,0.4212168544,-0.6369352438  
Cl,0,-1.3309231243,-2.475465454,0.3820080078  
N,0,1.3577142836,1.0167817935,-0.7899963422  
C,0,-2.1836101288,1.6428656687,0.0945562012  
C,0,-3.5346374732,2.1222573327,-0.4260187532  
C,0,1.6001423034,2.1543543017,0.1374893315  
C,0,2.5048175522,3.1859022809,-0.5283100435  
C,0,-2.2111386629,1.3729834166,1.5893543322  
C,0,2.1769996956,1.6538616866,1.4510425349  
H,0,-1.7795895225,0.6092658163,-1.6396747361  
H,0,-2.4574767329,-0.313160163,-0.483909193  
H,0,1.0366245734,1.3799689414,-1.6877411413  
H,0,2.248782278,0.5528626961,-0.9806833005  
H,0,-1.4319774165,2.4081750768,-0.1256745604  
H,0,-3.8195180864,3.0547413261,0.0727414068  
H,0,-4.3163063202,1.3785990779,-0.2271195408  
H,0,-3.5042720209,2.312900518,-1.504761628  
H,0,0.6225710131,2.6095515976,0.326247672  
H,0,2.6373674115,4.0493957009,0.1322112384  
H,0,2.0791116406,3.5464337576,-1.471805049  
H,0,3.495272604,2.7617910104,-0.7345510451  
H,0,-2.5059683173,2.2807698882,2.1255256513  
H,0,-1.2297026844,1.0576168555,1.958354943  
H,0,-2.9377422817,0.5872654063,1.8305784998  
H,0,2.3329108343,2.4997210041,2.1285249958  
H,0,3.1443724699,1.1619439912,1.2934576878  
H,0,1.5053403703,0.9396786284,1.9384955779

Sum of electronic and zero-point Energies= -18583.383253  
Sum of electronic and thermal Energies= -18583.366367  
Sum of electronic and thermal Enthalpies= -18583.365423  
Sum of electronic and thermal Free Energies= -18583.429810

***cis-(i-BuNH<sub>2</sub>)<sub>2</sub>PtCl<sub>2</sub>*** (DMF)

Pt,0,0.2736139685,-1.0304253171,0.0181643866

Cl,0,-0.1378934574,-2.4096707007,1.9482564126  
N,0,0.6759746924,0.1852080911,-1.708033326  
Cl,0,-0.2645176768,-2.7716009822,-1.5536078849  
N,0,0.7616638225,0.5170842419,1.4222471395  
C,0,0.0088727454,1.4942960725,-1.8361555892  
C,0,0.3472795402,2.2416000959,-3.1293785529  
C,0,-0.3686700903,1.3256834423,1.9226138414  
C,0,0.0460344603,2.4259481242,2.9032170702  
C,0,-0.2396511847,3.6504254462,-3.0610322812  
C,0,-0.1484181088,1.5045848809,-4.3721007896  
C,0,0.6903643588,1.8622760545,4.168594504  
C,0,-1.174608485,3.2783574156,3.245212027  
H,0,1.6868457377,0.3026669388,-1.7832418205  
H,0,0.4070121672,-0.4272596786,-2.4791180464  
H,0,1.4906430102,1.1262048222,1.0499827635  
H,0,1.1874594573,0.0116161634,2.199044575  
H,0,0.3058162373,2.1027837938,-0.9763613306  
H,0,-1.0710854249,1.3233265542,-1.7656060986  
H,0,1.4431559428,2.3300800251,-3.1868114228  
H,0,-1.0730355527,0.6334644625,2.3964512453  
H,0,-0.8712450224,1.7662352772,1.0559256819  
H,0,0.7797313298,3.0696162723,2.3933808267  
H,0,0.018201522,4.2198952655,-3.9608774629  
H,0,0.1386814088,4.2026756857,-2.1926408818  
H,0,-1.334415508,3.6153688983,-2.9898725062  
H,0,0.0954709785,2.0731554588,-5.2765893164  
H,0,-1.2384308982,1.3777851816,-4.3397823654  
H,0,0.305307681,0.5129081715,-4.4857668886  
H,0,0.9473598772,2.6722349881,4.8605696851  
H,0,1.6163735719,1.3123712843,3.9619450514  
H,0,0.0006536654,1.1840588481,4.6879372775  
H,0,-0.8959593252,4.1006950593,3.9136139569  
H,0,-1.940460484,2.6787605201,3.7538372182  
H,0,-1.6269939568,3.7130251426,2.3460019013

|                                              |               |
|----------------------------------------------|---------------|
| Sum of electronic and zero-point Energies=   | -18661.852628 |
| Sum of electronic and thermal Energies=      | -18661.832563 |
| Sum of electronic and thermal Enthalpies=    | -18661.831619 |
| Sum of electronic and thermal Free Energies= | -18661.905548 |

***cis-(i-AmNH<sub>2</sub>)<sub>2</sub>PtCl<sub>2</sub>*** (DMF)

Pt,0,-0.0001167031,-1.2206449195,0.0005233767  
Cl,0,1.4719114019,-2.8561120178,-0.980155094  
Cl,0,-1.4721995426,-2.8556299674,0.9819323985  
N,0,-1.3051215709,0.2503105411,0.8435628858  
C,0,-2.2725277389,0.8645954415,-0.0909336231  
C,0,-3.212664745,1.8424541306,0.6038487433  
C,0,-4.1561035731,2.5823741269,-0.3528728558  
C,0,-5.1089401027,1.634281738,-1.0805893789

C, 0, -4.9413028063, 3.6483305639, 0.4096033325  
N, 0, 1.3049778328, 0.2499024696, -0.8430914047  
C, 0, 2.272415676, 0.8644664347, 0.0911868132  
C, 0, 3.2126378453, 1.8420002159, -0.6039369104  
C, 0, 4.1561627442, 2.5821420823, 0.3525296683  
C, 0, 5.1089826302, 1.6342062989, 1.0804732289  
C, 0, 4.9413871074, 3.6478356117, -0.4102874174  
H, 0, -0.7731904309, 0.9781046272, 1.3210522511  
H, 0, -1.8133667241, -0.251413494, 1.5736177046  
H, 0, -2.8207148177, 0.0446309786, -0.56176438  
H, 0, -1.703655157, 1.374745983, -0.875385232  
H, 0, -2.6102129451, 2.5832539544, 1.1491116938  
H, 0, -3.808881073, 1.3038470894, 1.3557951441  
H, 0, -3.5360606494, 3.092243037, -1.1065503798  
H, 0, -5.7946000922, 2.196369904, -1.7257629696  
H, 0, -5.7160723529, 1.0680930994, -0.3614574118  
H, 0, -4.5798255977, 0.9141136994, -1.7146650802  
H, 0, -5.5920328229, 4.2157604949, -0.2663004749  
H, 0, -4.2719957787, 4.3587086626, 0.9097724915  
H, 0, -5.5773329813, 3.1878963158, 1.1772877173  
H, 0, 0.7730990108, 0.9775538929, -1.320855775  
H, 0, 1.8131919435, -0.2521324777, -1.5729538707  
H, 0, 2.8205309795, 0.0446362654, 0.5623343826  
H, 0, 1.7035619116, 1.3749505574, 0.8754351804  
H, 0, 2.6102486304, 2.5826781574, -1.1494338914  
H, 0, 3.8087914669, 1.3030884291, -1.3557149833  
H, 0, 3.5361852485, 3.0922639162, 1.1060899248  
H, 0, 5.7947000684, 2.196442425, 1.7254566519  
H, 0, 5.7160540397, 1.0677835478, 0.3614742497  
H, 0, 4.5798622579, 0.9142444414, 1.7147775773  
H, 0, 5.5921869799, 4.2154149133, 0.265423698  
H, 0, 4.2720974014, 4.3581146943, -0.9106202012  
H, 0, 5.5773490292, 3.1871471355, -1.1778757803

|                                              |               |
|----------------------------------------------|---------------|
| Sum of electronic and zero-point Energies=   | -18740.325219 |
| Sum of electronic and thermal Energies=      | -18740.302596 |
| Sum of electronic and thermal Enthalpies=    | -18740.301652 |
| Sum of electronic and thermal Free Energies= | -18740.382366 |

***cis-(c-C<sub>3</sub>H<sub>5</sub>NH<sub>2</sub>)<sub>2</sub>PtCl<sub>2</sub> (DMF)***

Pt, 0, -0.439311421, -0.1515428788, -0.3069996775  
Cl, 0, -2.5444420046, 0.8653627666, 0.2738130361  
Cl, 0, -1.1555370129, -2.3717508645, 0.3040347371  
N, 0, 1.4337232866, -1.0563493014, -0.8468196099  
N, 0, 0.1479663208, 1.821803573, -0.9307649955  
C, 0, 2.4762175923, -1.0340839394, 0.1716486098  
C, 0, 3.5953423249, -2.0342402265, 0.1203875083  
C, 0, 2.5290947276, -2.128345959, 1.1840893396  
C, 0, 1.17668069, 2.5075875332, -0.161578322

C,0,1.1447911022,4.0025877623,-0.022374065  
C,0,0.8157006246,3.1141072405,1.1527713482  
H,0,1.7908368021,-0.658095877,-1.7155444491  
H,0,1.181789092,-2.022548042,-1.0614922665  
H,0,-0.7331426576,2.3367306075,-0.8724197567  
H,0,0.4037013572,1.816088974,-1.9185430293  
H,0,2.7125057467,-0.0271758879,0.4987588834  
H,0,4.5889492127,-1.6940586274,0.398740767  
H,0,3.573377757,-2.7737632389,-0.6768091306  
H,0,1.796308641,-2.926062856,1.0930831738  
H,0,2.781162727,-1.8590882285,2.2057123014  
H,0,2.1482161831,2.0351115744,-0.2608962471  
H,0,0.3231117246,4.5368559175,-0.4935402341  
H,0,2.0947761874,4.5298151086,-0.0322855734  
H,0,1.5321813054,3.0297662281,1.9647828774  
H,0,-0.226334409,3.0546151515,1.4585787246

Sum of electronic and zero-point Energies= -18580.948330  
Sum of electronic and thermal Energies= -18580.933423  
Sum of electronic and thermal Enthalpies= -18580.932479  
Sum of electronic and thermal Free Energies= -18580.993809

***cis-(c-C<sub>4</sub>H<sub>7</sub>NH<sub>2</sub>)<sub>2</sub>PtCl<sub>2</sub> (DMF)***

Pt,0,0.562327,-0.095312,-0.181494  
Cl,0,2.638111,-0.342386,1.010181  
Cl,0,0.599999,2.302899,-0.067288  
N,0,0.588759,-2.227229,-0.399996  
H,0,1.331717,-2.596155,0.192889  
N,0,-1.279363,0.088365,-1.265313  
C,0,-2.569563,-0.005467,-0.555195  
C,0,-2.844817,0.951901,0.611153  
C,0,-3.633192,-0.19964,1.274677  
C,0,-2.835475,-1.185145,0.390559  
H,0,-0.274863,-2.699266,-0.139698  
H,0,0.805942,-2.498436,-1.3576  
H,0,-1.271854,-0.583902,-2.033039  
H,0,-1.218322,1.0089,-1.704237  
H,0,-3.372469,0.065878,-1.300324  
H,0,-3.362446,1.889936,0.388773  
H,0,-1.920964,1.165761,1.159335  
H,0,-4.693836,-0.17774,1.003958  
H,0,-3.543406,-0.312768,2.358323  
H,0,-1.91546,-1.487221,0.903212  
H,0,-3.340882,-2.067213,-0.014259

Sum of electronic and zero-point Energies= -18503.703292  
Sum of electronic and thermal Energies= -18503.690493  
Sum of electronic and thermal Enthalpies= -18503.689549

Sum of electronic and thermal Free Energies= -18503.744596

***cis-(c-C<sub>5</sub>H<sub>9</sub>NH<sub>2</sub>)<sub>2</sub>PtCl<sub>2</sub> (DMF)***

Pt, 0, 0.1709003451, -0.7760393602, -0.0033932008  
Cl, 0, 1.6916814574, -2.3407744917, 1.0131367484  
Cl, 0, -0.8636393819, -2.4513293143, -1.3896925517  
N, 0, 1.0678625742, 0.7300468006, 1.2533637266  
C, 0, 2.1203045361, 1.6321814134, 0.7320172521  
C, 0, 3.3942437726, 0.9119099222, 0.3025269516  
C, 0, 4.1471998249, 1.9677225817, -0.5282288385  
C, 0, 3.0746579375, 2.9911919079, -0.9879347593  
C, 0, 1.732553012, 2.4140794094, -0.5172362211  
N, 0, -1.247944497, 0.5829129422, -0.8688025886  
C, 0, -2.6041628899, 0.5529331036, -0.2861119477  
C, 0, -2.6544169203, 1.0554870798, 1.1543698818  
C, 0, -4.143452134, 1.3721178453, 1.3943924726  
C, 0, -4.784505617, 1.5053483723, -0.0126974165  
C, 0, -3.6163171574, 1.4470769844, -1.0041369452  
H, 0, 0.3233430299, 1.2900184153, 1.6682107036  
H, 0, 1.4599179888, 0.1853305527, 2.0232206699  
H, 0, 2.3624817483, 2.3443154072, 1.5354192311  
H, 0, 3.1185427838, 0.0498234401, -0.3177441947  
H, 0, 3.9755987379, 0.5346812374, 1.1508211304  
H, 0, 4.661914345, 1.5052389912, -1.3763553343  
H, 0, 4.9149760804, 2.4626327367, 0.07631496  
H, 0, 3.0865223828, 3.1546399674, -2.0699858806  
H, 0, 3.2498587908, 3.9648151383, -0.5161177353  
H, 0, 0.9737054043, 3.1842033883, -0.3354166975  
H, 0, 1.3443959787, 1.7099014076, -1.2662794485  
H, 0, -0.8994988751, 1.5420804585, -0.869182014  
H, 0, -1.2996320988, 0.3016052049, -1.848598113  
H, 0, -2.9351906016, -0.4907352428, -0.3327411341  
H, 0, -2.0591733473, 1.9771611549, 1.2304414142  
H, 0, -2.2438200787, 0.332246748, 1.8670916589  
H, 0, -4.2581436321, 2.2881016542, 1.9825038738  
H, 0, -4.6246461549, 0.5692074844, 1.9626436459  
H, 0, -5.3676023077, 2.4251193553, -0.1226341327  
H, 0, -5.4689857688, 0.6693316571, -0.197189211  
H, 0, -3.9010248835, 1.0639244871, -1.9901825317  
H, 0, -3.1787483843, 2.4460451598, -1.1446944241

Sum of electronic and zero-point Energies= -18737.965051  
Sum of electronic and thermal Energies= -18737.946168  
Sum of electronic and thermal Enthalpies= -18737.945224  
Sum of electronic and thermal Free Energies= -18738.016971

*cis*-(*c*-C<sub>6</sub>H<sub>11</sub>NH<sub>2</sub>)<sub>2</sub>PtCl<sub>2</sub> (DMF)

Pt, 0, 0.0014290173, -0.8465874666, 0.0388014144  
Cl, 0, -0.9854568515, -2.4967181752, 1.4936811422  
Cl, 0, 1.0001798883, -2.5218399486, -1.3800220242  
N, 0, 0.9980663648, 0.601989496, -1.2170668088  
C, 0, 2.2898059659, 1.2108790074, -0.7972418959  
C, 0, 3.3685009417, 0.1509293048, -0.613352687  
C, 0, 4.6994022846, 0.7981515603, -0.2276244602  
C, 0, 4.5590261384, 1.6648358117, 1.0226715373  
C, 0, 3.4568976488, 2.7079877568, 0.8483355629  
C, 0, 2.1300951523, 2.0511515763, 0.4640280513  
N, 0, -1.0194949728, 0.6168649195, 1.2564799857  
C, 0, -2.3067616357, 1.2130123403, 0.8066223155  
C, 0, -3.3657871049, 0.1420189365, 0.5768856419  
C, 0, -4.696087753, 0.7812485152, 0.1755722862  
C, 0, -4.539849779, 1.6739943434, -1.0545413677  
C, 0, -3.45001479, 2.7230301523, -0.8407353613  
C, 0, -2.1261006432, 2.0700437872, -0.4401138078  
H, 0, 0.347839317, 1.3488340796, -1.4594172213  
H, 0, 1.1545130628, 0.0791363502, -2.08056778  
H, 0, 2.5979494259, 1.8787474392, -1.6171786134  
H, 0, 3.4798878496, -0.4371265121, -1.5328279552  
H, 0, 3.0496270009, -0.5471505053, 0.1730758026  
H, 0, 5.0592318294, 1.4182992478, -1.0620712136  
H, 0, 5.4538268802, 0.0177351783, -0.0701572297  
H, 0, 5.5125002274, 2.1564030378, 1.2533457446  
H, 0, 4.317303467, 1.0235332479, 1.8833685221  
H, 0, 3.7488669956, 3.42336871, 0.0655879456  
H, 0, 3.3255363859, 3.2874942772, 1.7701299615  
H, 0, 1.8056362415, 1.3972803907, 1.2870325877  
H, 0, 1.3596902057, 2.8204340189, 0.3170001979  
H, 0, -0.3771933919, 1.369494722, 1.5026874988  
H, 0, -1.1894881829, 0.1024120223, 2.1224986225  
H, 0, -2.647298141, 1.8666992222, 1.6252032547  
H, 0, -3.4887041533, -0.4685467034, 1.4799043832  
H, 0, -3.0201542516, -0.5325915756, -0.2193653131  
H, 0, -5.0806330609, 1.3803296792, 1.0143430132  
H, 0, -5.437841928, -0.0042557512, -0.0134878191  
H, 0, -5.4931104267, 2.1621169549, -1.2932664624  
H, 0, -4.2770100415, 1.0517961829, -1.9230236757  
H, 0, -3.7629917042, 3.4229037628, -0.0521535381  
H, 0, -3.3052153263, 3.3187592204, -1.7500570329  
H, 0, -1.7841120688, 1.4276631925, -1.2649520602  
H, 0, -1.3624890839, 2.8410731933, -0.2698461442

|                                              |               |
|----------------------------------------------|---------------|
| Sum of electronic and zero-point Energies=   | -18816.453851 |
| Sum of electronic and thermal Energies=      | -18816.433900 |
| Sum of electronic and thermal Enthalpies=    | -18816.432956 |
| Sum of electronic and thermal Free Energies= | -18816.504414 |

*cis*-(*c*-C<sub>7</sub>H<sub>13</sub>NH<sub>2</sub>)<sub>2</sub>PtCl<sub>2</sub> (DMF)

Pt, 0, 0.0071273171, -1.8116694884, -1.5500201953  
Cl, 0, -1.8104931626, -3.4002954374, -1.5741439201  
Cl, 0, 1.6922683398, -3.5249747778, -1.3589556419  
N, 0, -1.5051067224, -0.3045281931, -1.802892262  
C, 0, -1.8893755895, 0.6017866316, -0.6860142442  
C, 0, -2.5094719114, -0.1998915794, 0.4553527172  
C, 0, -2.5950549186, 0.5573743374, 1.8087925476  
C, 0, -2.140511498, 2.0205143076, 1.8027470431  
C, 0, -3.0554443167, 2.9756999816, 1.0199740421  
C, 0, -3.7343285717, 2.3549770728, -0.1999678109  
C, 0, -2.8104189438, 1.7091823594, -1.232464948  
N, 0, 1.6564393038, -0.437349029, -1.7144065838  
C, 0, 1.9374799756, 0.5828952467, -0.6728767011  
C, 0, 3.2031503684, 1.3666683083, -1.0388006244  
C, 0, 3.4142900506, 2.684180439, -0.2433425721  
C, 0, 2.3872425954, 2.9848810299, 0.8529489633  
C, 0, 2.4552352827, 2.0467390445, 2.0679508753  
C, 0, 2.8584707579, 0.6092173231, 1.7426266842  
C, 0, 2.0115581355, -0.1107694302, 0.6944507879  
H, 0, -2.326077014, -0.8431030076, -2.0892324589  
H, 0, -1.2515954974, 0.2609968526, -2.6138273965  
H, 0, -0.9530430146, 1.0463444827, -0.340532997  
H, 0, -1.9156524922, -1.1106099125, 0.590706835  
H, 0, -3.5074640352, -0.5364398626, 0.1427943445  
H, 0, -1.9832869885, 0.0212167533, 2.5443319793  
H, 0, -3.6245402053, 0.5087090767, 2.1869718332  
H, 0, -1.1137454505, 2.0833181622, 1.4203546627  
H, 0, -2.0770250546, 2.3645487222, 2.8432308569  
H, 0, -2.4815538091, 3.8625514091, 0.7176978402  
H, 0, -3.8489676845, 3.3395920098, 1.6869121254  
H, 0, -4.3265019361, 3.1266679656, -0.7088679032  
H, 0, -4.4593356051, 1.6037162218, 0.1404595578  
H, 0, -3.4450271427, 1.2702071029, -2.0165465601  
H, 0, -2.1949511171, 2.4748555703, -1.7248339604  
H, 0, 2.4574879819, -1.0693308707, -1.7869327024  
H, 0, 1.5820340781, 0.0202623533, -2.6234237428  
H, 0, 1.0861876344, 1.2684651397, -0.7022552284  
H, 0, 3.1544680823, 1.6043288462, -2.1092628548  
H, 0, 4.0695707321, 0.7025851427, -0.9175749318  
H, 0, 3.4056591007, 3.5216955179, -0.9509439641  
H, 0, 4.4173367846, 2.681104757, 0.2027501204  
H, 0, 1.3778586598, 2.973652086, 0.4221873461  
H, 0, 2.5399148042, 4.017203856, 1.1933518786  
H, 0, 1.4870763095, 2.0546270564, 2.5875866775  
H, 0, 3.1887758538, 2.4408142962, 2.7846613177  
H, 0, 2.8331558495, 0.0158568219, 2.6657815892  
H, 0, 3.9072475281, 0.5996723001, 1.4165392078  
H, 0, 2.4397985862, -1.1116509872, 0.5444922663



H,0,0.9918354697,-0.2722282489,1.0691730548

|                                              |               |
|----------------------------------------------|---------------|
| Sum of electronic and zero-point Energies=   | -18894.896674 |
| Sum of electronic and thermal Energies=      | -18894.873918 |
| Sum of electronic and thermal Enthalpies=    | -18894.872974 |
| Sum of electronic and thermal Free Energies= | -18894.951421 |

***cis-(c-C<sub>8</sub>H<sub>15</sub>NH<sub>2</sub>)<sub>2</sub>PtCl<sub>2</sub> (DMF)***

Pt,0,-0.0182286947,-1.6674934458,-0.1848944942  
Cl,0,1.7642820714,-3.1100963323,0.5622208006  
Cl,0,-1.7023293345,-3.1367169757,0.7149036578  
N,0,1.5239216501,-0.4442231843,-1.0607027063  
C,0,2.5224478175,0.2227265605,-0.1699605699  
C,0,3.6839913846,0.7102220564,-1.0443306638  
C,0,4.9241110054,1.2755247394,-0.3278489019  
C,0,4.7352515228,2.1930432684,0.8848007694  
C,0,3.991885268,3.5240664514,0.6763709846  
C,0,2.7816406563,3.541333758,-0.2633707136  
C,0,1.5672507017,2.674352387,0.1099466543  
C,0,1.8157893012,1.2770606398,0.6910832495  
N,0,-1.596769897,-0.4383995167,-1.0078207473  
C,0,-2.7202083101,0.0404691136,-0.1501600658  
C,0,-2.145347465,0.8947853781,0.9820969213  
C,0,-3.1338653088,1.622676608,1.9012085093  
C,0,-4.1070204011,2.6511071758,1.3048396425  
C,0,-3.5637849169,3.6665700824,0.293610842  
C,0,-2.9015510772,3.146886091,-0.992596713  
C,0,-3.5744185218,1.9911281106,-1.7448972355  
C,0,-3.8260437266,0.6593692551,-1.0162948056  
H,0,2.0200775718,-1.1027317577,-1.6625903457  
H,0,1.1326020915,0.251225597,-1.697809874  
H,0,2.880020045,-0.5731682517,0.4918036966  
H,0,3.2932414641,1.431545535,-1.770114767  
H,0,4.0282372653,-0.1455566593,-1.6426389326  
H,0,5.5292001765,1.7930757232,-1.0855691151  
H,0,5.5341799615,0.4266492506,0.0098369855  
H,0,5.7395863688,2.4343425038,1.2598866684  
H,0,4.2714474264,1.617763358,1.6928119691  
H,0,4.7071264259,4.25651705,0.2761825396  
H,0,3.6947800317,3.9090430203,1.6629949601  
H,0,3.1235625674,3.3041842075,-1.2762754202  
H,0,2.4290007452,4.5804168539,-0.3241298919  
H,0,0.9075714738,2.6118143523,-0.7687286759  
H,0,0.9821991371,3.2127288895,0.8687644784  
H,0,2.3637574131,1.3811248586,1.6305437967  
H,0,0.8460096017,0.851100356,0.9796539567  
H,0,-1.1884209282,0.3639553415,-1.487809749  
H,0,-1.9853644801,-1.0237633838,-1.7484527214  
H,0,-3.1414250881,-0.867649754,0.2934321174

H,0,-1.4305786684,1.6180242744,0.5770410729  
H,0,-1.5497511498,0.2218607343,1.6132648598  
H,0,-2.5208488334,2.129171769,2.6595713736  
H,0,-3.7254320319,0.8767483404,2.4514186885  
H,0,-4.5192650729,3.2225983914,2.1484581571  
H,0,-4.9729974486,2.1441880033,0.8677042712  
H,0,-2.8427412952,4.3275276608,0.7967737093  
H,0,-4.4082507975,4.3112542638,0.0105720345  
H,0,-1.8558563733,2.8899182758,-0.7947299328  
H,0,-2.8473788558,3.9918068575,-1.693510171  
H,0,-2.9690032893,1.7966619294,-2.6420160756  
H,0,-4.5477930464,2.3313554168,-2.1262181186  
H,0,-4.7134624935,0.736543467,-0.3830949248  
H,0,-4.0969516397,-0.0864336957,-1.7784910344

Sum of electronic and zero-point Energies= -18973.351610  
Sum of electronic and thermal Energies= -18973.326737  
Sum of electronic and thermal Enthalpies= -18973.325792  
Sum of electronic and thermal Free Energies= -18973.409468

***cis*-(1-Adamantamine)<sub>2</sub>PtCl<sub>2</sub> (DMF)**

Pt,0,0.0004283001,-1.3519135555,-0.0317041561  
Cl,0,1.2251813823,-3.001425514,-1.295759451  
Cl,0,-1.2225392694,-3.0360395019,1.1876650616  
C,0,2.4078168578,0.7282499528,-0.4569047167  
C,0,2.0651324268,1.4226794193,0.8642966892  
C,0,3.3290918914,2.0610202574,1.4589039262  
C,0,2.9858898728,1.7638321144,-1.436363086  
C,0,4.7201467081,0.2710385173,0.3952160539  
C,0,5.2926294849,1.2992672271,-0.5881062732  
C,0,4.2524140843,2.3962047479,-0.8442293973  
C,0,3.8977369333,3.0909815465,0.4756488828  
C,0,4.3716853034,0.9663475787,1.7169586845  
C,0,3.4532363925,-0.3599244801,-0.1986099135  
N,0,1.187032725,0.1261075812,-1.0656418472  
C,0,-2.4091665295,0.7135016862,0.4490718722  
C,0,-2.067222103,1.4436728244,-0.8529102932  
C,0,-3.3319043189,2.0962794984,-1.4302403845  
C,0,-2.9885316138,1.7216484378,1.4559993567  
C,0,-4.7208843253,0.2766408814,-0.4152877905  
C,0,-5.2946623345,1.2773336607,0.595313531  
C,0,-4.2557793299,2.3682184672,0.8809888057  
C,0,-3.9018576268,3.0987094688,-0.4196686213  
C,0,-4.3731617733,1.0077035523,-1.7177923502  
C,0,-3.4532770126,-0.3685687429,0.1614743369  
N,0,-1.1877194386,0.0966152594,1.0414980382  
H,0,1.6600246599,0.6849308731,1.5708993124  
H,0,1.3015826012,2.1975283959,0.6985035697  
H,0,3.0650900461,2.5542185402,2.4033179153

H, 0, 2.2348810209, 2.5419481438, -1.6375729018  
H, 0, 3.2170234377, 1.275545648, -2.3939542653  
H, 0, 5.4584601576, -0.5209674153, 0.5758034213  
H, 0, 5.5649551338, 0.8085949385, -1.5332093335  
H, 0, 6.2106603781, 1.7414873058, -0.1770903692  
H, 0, 4.6506728119, 3.1299471398, -1.557096629  
H, 0, 4.7924176, 3.5628911748, 0.9044408008  
H, 0, 3.1645205516, 3.890290023, 0.2972806099  
H, 0, 3.9811962659, 0.2346398368, 2.4381810853  
H, 0, 5.2754167655, 1.4069458498, 2.1600802085  
H, 0, 3.6905640857, -0.8770723788, -1.1386852668  
H, 0, 3.038906298, -1.1115128812, 0.485437619  
H, 0, 1.467681996, -0.3677362832, -1.9159165958  
H, 0, 0.5738106506, 0.8799616153, -1.3785575676  
H, 0, -1.6611562628, 0.7257262253, -1.5790871166  
H, 0, -1.3046334607, 2.2146984016, -0.6661950411  
H, 0, -3.0684272194, 2.6150433716, -2.3610061418  
H, 0, -2.238481427, 2.4949731766, 1.6781623196  
H, 0, -3.2191463557, 1.2074877921, 2.4000768795  
H, 0, -5.4582361944, -0.5110962732, -0.6172113621  
H, 0, -5.566465924, 0.7610602187, 1.5268312003  
H, 0, -6.2131905142, 1.7293808423, 0.1962728146  
H, 0, -4.6549671564, 3.0820147441, 1.6133224144  
H, 0, -4.797080565, 3.5809200278, -0.8356784073  
H, 0, -3.1696135647, 3.8938054313, -0.2197763932  
H, 0, -3.9817328129, 0.2961524162, -2.4584124466  
H, 0, -5.2773899608, 1.4589864202, -2.1489867698  
H, 0, -3.6900600292, -0.9110932022, 1.087278416  
H, 0, -3.0379840772, -1.1010062856, -0.542472415  
H, 0, -1.4678279368, -0.4201344844, 1.8782293674  
H, 0, -0.5753166862, 0.8424887663, 1.3744921104

Sum of electronic and zero-point Energies= -19125.670385  
Sum of electronic and thermal Energies= -19125.647245  
Sum of electronic and thermal Enthalpies= -19125.646300  
Sum of electronic and thermal Free Energies= -19125.724096

***cis*-(2-Adamantamine)<sub>2</sub>PtCl<sub>2</sub> (DMF)**

Pt, 0, -1.2559580386, -1.5764646913, 0.  
Cl, 0, -1.0997072784, -3.2799363139, 1.6967508337  
Cl, 0, -1.0997072784, -3.2799363139, -1.6967508337  
C, 0, 0.6969758237, -0.1386596025, 2.6496633857  
C, 0, -0.8259778539, -0.1335834463, 2.8184229513  
C, 0, -1.2328348167, 1.0041239592, 3.7735485945  
C, 0, 1.2064612761, 1.2228225019, 2.1564779032  
C, 0, 0.9169551059, 0.6534418652, 5.0246551595  
C, 0, 1.4289416586, 2.0103856474, 4.5242597117  
C, 0, 0.8141453545, 2.3211726107, 3.1531650905  
C, 0, -0.7145261372, 2.3620961242, 3.2771478208

C,0,-0.6117467177,0.6999543217,5.1454706043  
C,0,1.31492632,-0.4389386679,4.0234548778  
N,0,-1.5338865799,-0.0512386386,1.515784098  
C,0,-1.2328348167,1.0041239592,-3.7735485945  
C,0,-0.8259778539,-0.1335834463,-2.8184229513  
C,0,0.6969758237,-0.1386596025,-2.6496633857  
C,0,-0.7145261372,2.3620961242,-3.2771478208  
C,0,0.9169551059,0.6534418652,-5.0246551595  
C,0,1.4289416586,2.0103856474,-4.5242597117  
C,0,0.8141453545,2.3211726107,-3.1531650905  
C,0,1.2064612761,1.2228225019,-2.1564779032  
C,0,1.31492632,-0.4389386679,-4.0234548778  
C,0,-0.6117467177,0.6999543217,-5.1454706043  
N,0,-1.5338865799,-0.0512386386,-1.515784098  
H,0,0.969551959,-0.9281954118,1.9377318989  
H,0,-1.133168831,-1.090969098,3.2496012093  
H,0,-2.328379994,1.0287449332,3.8639276588  
H,0,0.8127777039,1.4587888968,1.1569207471  
H,0,2.298920459,1.1800756636,2.0476404019  
H,0,1.3554832384,0.4299388628,6.0064254797  
H,0,2.5255644707,1.9944535016,4.4488662411  
H,0,1.1659835275,2.80089891,5.2415115677  
H,0,1.1802625824,3.2923971705,2.7944923655  
H,0,-1.0176532518,3.1436508856,3.9872611198  
H,0,-1.1673114051,2.6385137514,2.3132900037  
H,0,-0.9923953441,-0.2578415777,5.5270979117  
H,0,-0.9124491866,1.4754696373,5.8633697108  
H,0,2.4086363104,-0.4866514111,3.9308236926  
H,0,0.9781634722,-1.4229307274,4.3788644831  
H,0,-1.3539988407,0.8622654114,1.1016337247  
H,0,-2.5385820113,-0.0656250304,1.6973118514  
H,0,-2.328379994,1.0287449332,-3.8639276588  
H,0,-1.133168831,-1.090969098,-3.2496012093  
H,0,0.969551959,-0.9281954118,-1.9377318989  
H,0,-1.1673114051,2.6385137514,-2.3132900037  
H,0,-1.0176532518,3.1436508856,-3.9872611198  
H,0,1.3554832384,0.4299388628,-6.0064254797  
H,0,1.1659835275,2.80089891,-5.2415115677  
H,0,2.5255644707,1.9944535016,-4.4488662411  
H,0,1.1802625824,3.2923971705,-2.7944923655  
H,0,2.298920459,1.1800756636,-2.0476404019  
H,0,0.8127777039,1.4587888968,-1.1569207471  
H,0,0.9781634722,-1.4229307274,-4.3788644831  
H,0,2.4086363104,-0.4866514111,-3.9308236926  
H,0,-0.9124491866,1.4754696373,-5.8633697108  
H,0,-0.9923953441,-0.2578415777,-5.5270979117  
H,0,-2.5385820113,-0.0656250304,-1.6973118514  
H,0,-1.3539988407,0.8622654114,-1.1016337247

|                                              |               |
|----------------------------------------------|---------------|
| Sum of electronic and zero-point Energies=   | -19125.656382 |
| Sum of electronic and thermal Energies=      | -19125.634647 |
| Sum of electronic and thermal Enthalpies=    | -19125.633702 |
| Sum of electronic and thermal Free Energies= | -19125.708455 |

***cis*-(C<sub>5</sub>H<sub>5</sub>N)<sub>2</sub>PtCl<sub>2</sub> (DMF)**

Pt, 0, -0.0000263399, -0.778880214, -0.0001334005  
Cl, 0, 1.7402001681, -2.4352221088, -0.0161065204  
Cl, 0, -1.7377650967, -2.4380385417, 0.0155636808  
C, 0, 1.9037902877, 1.2685610847, -1.1691728509  
C, 0, 2.0472187608, 1.1386368654, 1.1394752888  
C, 0, 2.8870615155, 2.2481172662, -1.2153735785  
H, 0, 1.428017789, 0.8984899092, -2.0711991773  
C, 0, 3.0347841875, 2.1143107358, 1.1732764753  
H, 0, 1.6841959946, 0.6658568525, 2.0458255805  
C, 0, 3.4636966205, 2.6803686636, -0.0241911084  
H, 0, 3.1887120593, 2.6572454349, -2.1739151879  
H, 0, 3.4546933021, 2.4163938305, 2.1270160727  
H, 0, 4.2353448148, 3.4445750025, -0.0291181705  
C, 0, -1.9054049073, 1.2668676366, 1.1693528959  
C, 0, -2.0486468232, 1.1375938638, -1.1393366064  
C, 0, -2.8883552036, 2.2467385749, 1.2157177643  
H, 0, -1.4298119723, 0.8964417425, 2.071328277  
C, 0, -3.0358872683, 2.1136080117, -1.1729765192  
H, 0, -1.6856725399, 0.6649692078, -2.0457876599  
C, 0, -3.4646859036, 2.6795437873, 0.0245890128  
H, 0, -3.1899452995, 2.6557317351, 2.1743366104  
H, 0, -3.4555877338, 2.4161022672, -2.1266782191  
H, 0, -4.2359948276, 3.4440928768, 0.0296308119  
N, 0, 1.4938976618, 0.7279470971, -0.0117440992  
N, 0, -1.495529246, 0.7264484185, 0.0118206279

|                                              |               |
|----------------------------------------------|---------------|
| Sum of electronic and zero-point Energies=   | -18730.876636 |
| Sum of electronic and thermal Energies=      | -18730.861054 |
| Sum of electronic and thermal Enthalpies=    | -18730.860110 |
| Sum of electronic and thermal Free Energies= | -18730.924117 |

***cis*-(C<sub>5</sub>H<sub>10</sub>NH)<sub>2</sub>PtCl<sub>2</sub> (DMF)**

Pt, 0, 0.0003578056, -0.8505118134, 0.0026703793  
Cl, 0, 1.5276189055, -2.7214989742, -0.0166356847  
Cl, 0, -1.9318843714, -2.3057060445, -0.0122192111  
C, 0, 1.9591446107, 1.2042231975, -1.2137263344  
C, 0, 2.0095413176, 1.1438518301, 1.2410921347  
H, 0, 2.4782975985, -0.3761867807, -0.0342942023  
C, 0, 3.3335384944, 1.8654930958, -1.2506600234  
H, 0, 1.1742991398, 1.9705703838, -1.2142987759  
H, 0, 1.7987660109, 0.5627720957, -2.0845895912  
C, 0, 3.3857367588, 1.8016685492, 1.2548790126

H,0,1.2277472363,1.9099357496,1.3096993825  
H,0,1.8816950787,0.4607423309,2.085199505  
C,0,3.5909778912,2.6735565708,0.0187085863  
H,0,3.392343125,2.501407422,-2.1420060932  
H,0,4.1037701712,1.0891549955,-1.3626343918  
H,0,3.4829801496,2.3911253227,2.1743606173  
H,0,4.1582413013,1.0205260176,1.2948192514  
H,0,4.606458666,3.0863580738,0.0079442311  
H,0,2.900739681,3.5287913249,0.0547999456  
C,0,-2.0832522525,1.0221928986,-1.2253691785  
C,0,-2.166830682,0.9486696357,1.226188189  
H,0,-0.6655007348,1.6841780355,0.0733786941  
C,0,-2.9052299532,2.3064704576,-1.2404307553  
H,0,-2.7292709013,0.1408730607,-1.2883064218  
H,0,-1.3828380875,0.9858719204,-2.0652566922  
C,0,-2.989182,2.2322239952,1.2615339921  
H,0,-2.8148174336,0.0676474148,1.192232237  
H,0,-1.5254014825,0.859833237,2.1079535541  
C,0,-3.8109396025,2.3940777723,-0.0147325351  
H,0,-3.4913648588,2.3347514782,-2.1669421489  
H,0,-2.2287713423,3.1733027065,-1.2672212583  
H,0,-3.6363751414,2.206945781,2.1465954018  
H,0,-2.3177434392,3.094533104,1.3849520826  
H,0,-4.3493935019,3.3490931381,-0.0045474667  
H,0,-4.5698229201,1.6000097496,-0.0637817423  
N,0,1.7801172382,0.3719079794,-0.0018951931  
N,0,-1.2961524754,0.8827442886,0.0254405035

Sum of electronic and zero-point Energies= -18737.964573  
Sum of electronic and thermal Energies= -18737.946878  
Sum of electronic and thermal Enthalpies= -18737.945934  
Sum of electronic and thermal Free Energies= -18738.012160

***cis*-[(CH<sub>3</sub>)<sub>2</sub>NH]<sub>2</sub>PtCl<sub>2</sub> (DMF)**

Pt,0,0.0173349391,-0.2624642343,0.0135128005  
Cl,0,-1.9981310849,-1.5921815607,0.0296229372  
N,0,1.8779093882,0.8412574494,-0.0039025011  
Cl,0,1.4251852294,-2.2198122269,0.0465502235  
N,0,-1.1892977071,1.5404296493,-0.0182626314  
C,0,2.1043065903,1.6645777617,-1.2015726049  
C,0,-2.0138513441,1.6539824259,-1.2354598962  
C,0,2.1631302366,1.5767379427,1.2379293973  
H,0,2.5197440198,0.047364269,-0.04757889  
H,0,-0.5228407384,2.3103264366,-0.0361506507  
C,0,-2.0057025028,1.701191012,1.1991023901  
H,0,3.1339262632,2.0435652217,-1.2154960415  
H,0,1.4252764238,2.521143525,-1.2027957927  
H,0,1.9240353396,1.0635548237,-2.0946586096  
H,0,-2.554784178,2.6088357441,-1.2392262109

H, 0, -2.7277006732, 0.8290384731, -1.2540041638  
H, 0, -1.3724950397, 1.5947388833, -2.1171728017  
H, 0, 2.054623141, 0.9032706496, 2.0899822006  
H, 0, 1.4628672793, 2.4084432157, 1.3489676995  
H, 0, 3.1832518754, 1.9809215389, 1.2171393492  
H, 0, -1.3587009388, 1.6745740856, 2.0783781673  
H, 0, -2.7200652694, 0.8782544988, 1.2540132897  
H, 0, -2.5456212492, 2.6561504157, 1.1706823396

Sum of electronic and zero-point Energies= -18504.878880  
Sum of electronic and thermal Energies= -18504.864516  
Sum of electronic and thermal Enthalpies= -18504.863572  
Sum of electronic and thermal Free Energies= -18504.921231

***cis*-(CH<sub>3</sub>NH<sub>2</sub>)(NH<sub>3</sub>)PtCl<sub>2</sub> (DMF)**

Pt, 0, 0.4226597026, -0.0630237222, -0.0764701408  
Cl, 0, 2.6410060882, -0.8620841921, 0.3843837968  
Cl, 0, 1.0476574423, 2.2568212212, 0.0393038988  
N, 0, -1.5553552065, 0.6354104924, -0.4799733996  
N, 0, -0.1520580149, -2.1243760145, -0.2150061037  
C, 0, -2.6199645164, 0.2229535659, 0.4496213412  
H, 0, -2.7430118546, -0.8608487991, 0.4094114665  
H, 0, -3.5711478179, 0.6967372883, 0.1839346385  
H, 0, -0.6748204556, -2.3500360846, -1.0590868163  
H, 0, -1.8093596889, 0.3837949912, -1.4344139059  
H, 0, -1.4638085255, 1.6518431074, -0.4729532816  
H, 0, 0.6989568342, -2.6859474899, -0.2214965501  
H, 0, -0.7063417278, -2.4307118871, 0.5824100627  
H, 0, -2.3420122593, 0.513067523, 1.4641349936

Sum of electronic and zero-point Energies= -18387.198481  
Sum of electronic and thermal Energies= -18387.187964  
Sum of electronic and thermal Enthalpies= -18387.187019  
Sum of electronic and thermal Free Energies= -18387.236557

***cis*-(*i*-PrNH<sub>2</sub>)(NH<sub>3</sub>)PtCl<sub>2</sub> (DMF)**

Pt, 0, 0.0361222309, -0.6685484985, -0.1666880424  
Cl, 0, 2.1156715044, -1.7691726852, 0.3328768245  
N, 0, -1.8055042142, 0.3239268843, -0.6440095808  
Cl, 0, -1.311800577, -2.4775885036, 0.668259544  
N, 0, 1.2264259899, 0.9401807509, -0.9389505001  
C, 0, -2.1614933248, 1.5742113028, 0.0783291306  
C, 0, -3.4577863648, 2.1522281918, -0.478766707  
H, 0, 1.1667380377, 1.7830061222, -0.3706052696  
C, 0, -2.2527205458, 1.305161104, 1.5715725381  
H, 0, -1.8213318897, 0.4967424994, -1.6494381935  
H, 0, -2.5246453284, -0.3821175869, -0.4709053661  
H, 0, 2.2005282014, 0.6389375699, -0.9316785667



H,0,0.9924621334,1.197534359,-1.8958711913  
H,0,-1.3469582877,2.281482822,-0.1144071408  
H,0,-3.6920338377,3.0964457222,0.0242966607  
H,0,-4.2956691907,1.4637873405,-0.3140863032  
H,0,-3.3798856457,2.3540871263,-1.5531609389  
H,0,-2.510095697,2.2296236313,2.0984183687  
H,0,-1.3043096053,0.9328943728,1.9728237427  
H,0,-3.0326135891,0.5646774746,1.7884909913

Sum of electronic and zero-point Energies= -18465.679089  
Sum of electronic and thermal Energies= -18465.665983  
Sum of electronic and thermal Enthalpies= -18465.665039  
Sum of electronic and thermal Free Energies= -18465.720529

***cis-(c-C<sub>3</sub>H<sub>5</sub>NH<sub>2</sub>)(NH<sub>3</sub>)PtCl<sub>2</sub> (DMF)***

Pt,0,0.4176856116,-0.0692106692,-0.0827416769  
Cl,0,2.6533133194,-0.8406429273,0.3468386819  
Cl,0,1.0005449396,2.2575473402,0.0848243931  
N,0,-1.5778225538,0.6050392382,-0.4888016488  
N,0,-0.1314248997,-2.1328886712,-0.2429617796  
C,0,-2.6015087694,0.2591844359,0.488252183  
C,0,-3.4505816046,-0.9518047432,0.2720137419  
C,0,-4.0527186637,0.4266206249,0.1485448495  
H,0,-0.4388522956,-2.3894261859,-1.1790165306  
H,0,-1.8521042631,0.2916592827,-1.4202568343  
H,0,-1.4863975324,1.6212321065,-0.5467640355  
H,0,0.6865047224,-2.7004611937,-0.0235272779  
H,0,-0.8717188805,-2.3931372717,0.4060712127  
H,0,-2.2867366929,0.4890339605,1.5010773767  
H,0,-3.6999401608,-1.5588640311,1.1375786661  
H,0,-3.314660052,-1.5124224495,-0.6505138934  
H,0,-4.3002303916,0.7736580452,-0.8519694792  
H,0,-4.7151248331,0.7833631088,0.9320730513

Sum of electronic and zero-point Energies= -18464.461991  
Sum of electronic and thermal Energies= -18464.449789  
Sum of electronic and thermal Enthalpies= -18464.448845  
Sum of electronic and thermal Free Energies= -18464.503876

***cis-(c-C<sub>4</sub>H<sub>7</sub>NH<sub>2</sub>)(NH<sub>3</sub>)PtCl<sub>2</sub> (DMF)***

Pt,0,0.562327,-0.095312,-0.181494  
Cl,0,2.638111,-0.342386,1.010181  
Cl,0,0.599999,2.302899,-0.067288  
N,0,0.588759,-2.227229,-0.399996  
H,0,1.331717,-2.596155,0.192889  
N,0,-1.279363,0.088365,-1.265313  
C,0,-2.569563,-0.005467,-0.555195  
C,0,-2.844817,0.951901,0.611153



C,0,-3.633192,-0.19964,1.274677  
C,0,-2.835475,-1.185145,0.390559  
H,0,-0.274863,-2.699266,-0.139698  
H,0,0.805942,-2.498436,-1.3576  
H,0,-1.271854,-0.583902,-2.033039  
H,0,-1.218322,1.0089,-1.704237  
H,0,-3.372469,0.065878,-1.300324  
H,0,-3.362446,1.889936,0.388773  
H,0,-1.920964,1.165761,1.159335  
H,0,-4.693836,-0.17774,1.003958  
H,0,-3.543406,-0.312768,2.358323  
H,0,-1.91546,-1.487221,0.903212  
H,0,-3.340882,-2.067213,-0.014259

Sum of electronic and zero-point Energies= -18503.703292  
Sum of electronic and thermal Energies= -18503.690493  
Sum of electronic and thermal Enthalpies= -18503.689549  
Sum of electronic and thermal Free Energies= -18503.744596

***cis-(c-C<sub>5</sub>H<sub>9</sub>NH<sub>2</sub>)(NH<sub>3</sub>)PtCl<sub>2</sub> (DMF)***

Pt,0,-0.7784882628,-0.1107102904,-0.1444248984  
Cl,0,-0.943518291,2.2834974016,-0.0367831202  
Cl,0,-2.8108632411,-0.4523691565,1.0938453001  
N,0,0.9948306546,0.1837096927,-1.3318680473  
C,0,2.3495672778,0.1036880133,-0.7404247795  
C,0,2.6135558082,1.1514094733,0.3376294839  
C,0,3.8457021546,0.6114354615,1.0958279363  
C,0,3.9798599946,-0.8769038863,0.6841833906  
C,0,2.667284976,-1.2068542482,-0.0324368703  
N,0,-0.6898889596,-2.2466558846,-0.3257713686  
H,0,-0.767612784,-2.5548509491,-1.2933022917  
H,0,0.9426712452,-0.4485703217,-2.130442822  
H,0,0.8628161031,1.1212957405,-1.7147120089  
H,0,3.0669245348,0.2404387575,-1.5638044363  
H,0,1.73721657,1.1999342346,0.9957273971  
H,0,2.7670337751,2.1533872018,-0.0769961936  
H,0,3.7101565052,0.7171759219,2.1770452614  
H,0,4.7502845053,1.1704538897,0.8344212042  
H,0,4.1612004313,-1.5377425807,1.5375381329  
H,0,4.8209957955,-1.0067374379,-0.0074619596  
H,0,2.7420470518,-2.066195279,-0.7085772818  
H,0,1.8820748391,-1.4080433164,0.709259192  
H,0,0.1517761049,-2.6685994613,0.0607771702  
H,0,-1.4867537888,-2.6323069763,0.1802486096

Sum of electronic and zero-point Energies= -18542.967832  
Sum of electronic and thermal Energies= -18542.953940  
Sum of electronic and thermal Enthalpies= -18542.952996

Sum of electronic and thermal Free Energies= -18543.011012

***cis-(c-C<sub>6</sub>H<sub>11</sub>NH<sub>2</sub>)(NH<sub>3</sub>)PtCl<sub>2</sub> (DMF)***

Pt, 0, 0.9798350163, -0.1126990457, -0.1632621625  
Cl, 0, 1.1928246782, 2.2805040674, -0.1068370902  
Cl, 0, 2.9123245949, -0.4559224718, 1.2340090231  
N, 0, 0.8803044088, -2.2507127785, -0.3158069282  
H, 0, 1.0399573192, -2.5731477069, -1.2685868064  
N, 0, -0.7421178182, 0.1786317748, -1.4252762632  
C, 0, -2.1203875036, 0.1414399395, -0.8699804246  
C, 0, -2.3255400932, 1.2343806612, 0.1707957025  
C, 0, -3.7636390779, 1.2156348326, 0.6907415632  
C, 0, -4.1418121993, -0.1569712096, 1.2454183574  
C, 0, -3.8973139591, -1.2575713392, 0.2140553993  
C, 0, -2.4543080772, -1.2278006478, -0.2921860454  
H, 0, 0.0015933248, -2.6561530581, -0.0007757814  
H, 0, 1.6236422124, -2.6379600091, 0.2647930214  
H, 0, -0.6807910963, -0.4790697552, -2.202924563  
H, 0, -0.5801280748, 1.1022089917, -1.830251096  
H, 0, -2.8003192749, 0.3339010692, -1.7149529026  
H, 0, -2.0854087706, 2.2156554274, -0.2573147558  
H, 0, -1.6229418378, 1.0677335675, 0.9994316733  
H, 0, -4.449826261, 1.479822443, -0.127596052  
H, 0, -3.8849607868, 1.9866190591, 1.4613752141  
H, 0, -5.1923911224, -0.1615181579, 1.5620240845  
H, 0, -3.5400069873, -0.3633125497, 2.1429877883  
H, 0, -4.5834498509, -1.1244353244, -0.6352242492  
H, 0, -4.1165370318, -2.2425535104, 0.6435028631  
H, 0, -1.7761326121, -1.4296870975, 0.5500038686  
H, 0, -2.2988691194, -2.0107171717, -1.0470634384

Sum of electronic and zero-point Energies= -18582.213915  
Sum of electronic and thermal Energies= -18582.199319  
Sum of electronic and thermal Enthalpies= -18582.198375  
Sum of electronic and thermal Free Energies= -18582.257208

***cis-(Quinoline)(NH<sub>3</sub>)PtCl<sub>2</sub> (DMF)***

Pt, 0, 1.5370870957, -2.2321407227, -0.355553642  
Cl, 0, 3.275793769, -3.8888603724, -0.4487308767  
Cl, 0, -0.2041399839, -3.8768791317, -0.224882275  
H, 0, 2.1600778127, -1.2542946413, -2.8785345467  
C, 0, 3.55321719, -0.3510847511, 0.743367002  
C, 0, 4.4080236186, 0.9572397448, -1.515582251  
C, 0, 4.5243506325, 0.6567007242, 0.8710658308  
H, 0, 3.1968832024, -0.8846276201, 1.6189936627  
C, 0, 4.9473253994, 1.3126555091, -0.2583487808  
H, 0, 4.9145553277, 0.8948334649, 1.85460274

H,0,5.6934461206,2.1010670772,-0.2012557731  
H,0,-0.9101376728,-1.2053612135,-0.280327094  
H,0,0.0481917481,-0.2075701934,0.6074438318  
H,0,0.0322325498,-0.0832524992,-1.0292563423  
N,0,3.0230082339,-0.7053125704,-0.4180018839  
N,0,-0.0009649258,-0.7449734644,-0.2560765047  
C,0,3.4298138791,-0.0813750167,-1.5707780355  
C,0,3.3064251098,0.1863548079,-3.9711628093  
C,0,4.2681399165,1.2208471755,-3.92138246  
H,0,2.8880156322,-0.1102218823,-4.9288766946  
C,0,4.8092894746,1.5964479976,-2.7156405576  
H,0,4.5786580133,1.7133448229,-4.8382672291  
H,0,5.5533152594,2.3870831763,-2.6604740381  
C,0,2.8927925974,-0.4544204212,-2.8251412731

Sum of electronic and zero-point Energies= -18692.846848  
Sum of electronic and thermal Energies= -18692.831993  
Sum of electronic and thermal Enthalpies= -18692.831049  
Sum of electronic and thermal Free Energies= -18692.891019

**(H<sub>2</sub>NCH<sub>2</sub>CH<sub>2</sub>NH<sub>2</sub>)PtCl<sub>2</sub> (DMF)**

Pt,0,-0.1353400696,0.0000230251,-0.0000242332  
Cl,0,-1.7230523,1.7027111161,0.0540658379  
N,0,1.3910289082,-1.3642983703,-0.046566981  
Cl,0,-1.7231259834,-1.7025944679,-0.0539801927  
N,0,1.3910955409,1.364261705,0.0467092293  
C,0,2.6609493164,-0.6853276397,0.3214214852  
H,0,1.4600143539,-1.7573304177,-0.9867080291  
H,0,1.2135643876,-2.1539956267,0.5745700418  
H,0,1.2136836824,2.1539824621,-0.5744130371  
C,0,2.6609949246,0.6852354181,-0.3212353916  
H,0,1.4600635109,1.7572612972,0.9868648917  
H,0,3.5247609123,1.2742621048,0.0013042801  
H,0,2.6844705234,0.6007266109,-1.411130162  
H,0,3.524693122,-1.2743963915,-0.0010954175  
H,0,2.6843991704,-0.6008208252,1.411317678

Sum of electronic and zero-point Energies= -1229.766867  
Sum of electronic and thermal Energies= -1229.757873  
Sum of electronic and thermal Enthalpies= -1229.756929  
Sum of electronic and thermal Free Energies= -1229.802954

**[H<sub>2</sub>NCH<sub>2</sub>CH<sub>2</sub>NH(CH<sub>2</sub>CH<sub>2</sub>OH)]PtCl<sub>2</sub> (DMF)**

Pt,0,-0.1480021796,0.0483948473,-0.2081918463  
Cl,0,-1.9985223703,-1.3588675636,-0.8279208505  
N,0,1.6257375853,1.1204277984,0.3697137073  
Cl,0,-1.5156688277,2.0017624556,0.1090854171  
N,0,1.2271971968,-1.549185618,-0.4831147051

C, 0, 2.7687930812, 0.3027860971, -0.1220434002  
C, 0, 1.6521642627, 1.4315232895, 1.8138314251  
H, 0, 1.6049164188, 1.9999981556, -0.1470109089  
H, 0, 0.8791391353, -2.428801796, -0.1048906148  
C, 0, 2.5116524759, -1.1654251166, 0.1451216237  
H, 0, 1.3438444656, -1.6938326689, -1.4859156997  
H, 0, 3.3366981867, -1.7727147205, -0.2433747322  
H, 0, 2.427081412, -1.361179152, 1.2170423492  
H, 0, 3.7107258397, 0.6151209813, 0.3416333399  
H, 0, 2.8519481273, 0.4808922272, -1.1985098531  
C, 0, 2.7259752752, 2.4401200128, 2.2014783762  
O, 0, 2.5628928575, 2.665814791, 3.5904356033  
H, 0, 1.7888952007, 0.5006674505, 2.3712992051  
H, 0, 0.6725974683, 1.8387760863, 2.0779729526  
H, 0, 2.5845384002, 3.3711969843, 1.6331326194  
H, 0, 3.7329654781, 2.0583617686, 1.9882465997  
H, 0, 3.2371305103, 3.2944636902, 3.8830793921

Sum of electronic and zero-point Energies= -18578.852582  
Sum of electronic and thermal Energies= -18578.839142  
Sum of electronic and thermal Enthalpies= -18578.838198  
Sum of electronic and thermal Free Energies= -18578.895075

**[MeHNCH<sub>2</sub>CH<sub>2</sub>NHMe]PtCl<sub>2</sub> (DMF)**

Pt, 0, -0.158391473, 0.0002877319, -0.0003133016  
Cl, 0, -1.801461674, -1.7528501945, -0.1330602721  
N, 0, 1.4429756824, 1.4171549538, 0.1430201216  
Cl, 0, -1.801652832, 1.7533202732, 0.1323263489  
N, 0, 1.4429079116, -1.4164937401, -0.1436561035  
C, 0, 2.6697408608, 0.7004535115, -0.2876127617  
C, 0, 1.5641630287, 2.0346043698, 1.4757797409  
H, 0, 1.2480852532, 2.160364382, -0.5264815195  
H, 0, 1.2478274289, -2.159837168, 0.5256576088  
C, 0, 2.6695552663, -0.6998901243, 0.287448912  
C, 0, 1.5644075089, -2.0337106415, -1.4764880933  
H, 0, 3.5654131941, -1.2475134346, -0.0313757792  
H, 0, 2.667978552, -0.6687799042, 1.3806758236  
H, 0, 3.5655206334, 1.2479456548, 0.0316505634  
H, 0, 2.66868473, 0.6694193923, -1.3808402437  
H, 0, 1.7363696367, 1.2631545373, 2.2284864359  
H, 0, 0.6318403816, 2.5519713743, 1.7072063081  
H, 0, 2.3978603592, 2.7473074028, 1.4901725079  
H, 0, 1.7365388162, -1.2621327149, -2.2290783769  
H, 0, 0.632228261, -2.5512545198, -1.7080947514  
H, 0, 2.398258074, -2.7462396418, -1.4908701684

Sum of electronic and zero-point Energies= -18503.710003  
Sum of electronic and thermal Energies= -18503.697858  
Sum of electronic and thermal Enthalpies= -18503.696914

Sum of electronic and thermal Free Energies= -18503.749586

**(1,2-DACH)PtCl<sub>2</sub> (DMF)**

Pt, 0, 0.944889003, -0.0000128152, -0.0001168786  
Cl, 0, 2.5807580117, 1.7673518359, 0.0457812777  
N, 0, -0.665511635, -1.3831449839, -0.014125471  
Cl, 0, 2.5811792792, -1.7671070763, -0.0453152395  
N, 0, -0.6655129632, 1.3830438876, 0.0134490583  
C, 0, -1.9367728945, -0.6842825237, -0.3367982573  
H, 0, -0.7169010889, -1.8013367531, 0.9157135281  
H, 0, -0.5006202959, -2.1526703611, -0.6624375253  
H, 0, -0.5005383714, 2.1526623971, 0.6616206873  
C, 0, -1.936694363, 0.6841857547, 0.3363907395  
H, 0, -0.7169605365, 1.8010194302, -0.9164796331  
C, 0, -3.1680354794, 1.515290712, -0.0657261828  
H, 0, -1.9230181532, 0.5303814508, 1.4220508331  
C, 0, -4.3840699676, 0.6406671772, -0.4124220222  
C, 0, -4.383745483, -0.6406666881, 0.4133440059  
C, 0, -3.1680791832, -1.515328054, 0.0655652024  
H, 0, -1.9232682324, -0.5304512121, -1.4224581169  
H, 0, -2.9123238821, 2.1443646468, -0.9282746329  
H, 0, -3.4114643107, 2.1969083219, 0.7571180043  
H, 0, -2.9120805075, -2.1448885223, 0.9276742831  
H, 0, -3.4121529834, -2.1965037675, -0.7574572317  
H, 0, -4.3683625682, 0.3816481737, -1.4797632338  
H, 0, -5.3039257999, 1.2115586918, -0.2450774993  
H, 0, -5.3037684355, -1.2115193517, 0.246767725  
H, 0, -4.3671191595, -0.3816703709, 1.4806765795

Sum of electronic and zero-point Energies= -18581.026847  
Sum of electronic and thermal Energies= -18581.013695  
Sum of electronic and thermal Enthalpies= -18581.012751  
Sum of electronic and thermal Free Energies= -18581.069488

**(1,4-DACH)PtCl<sub>2</sub> (DMF)**

Pt, 0, -0.0645689149, 0.714858323, -0.0120060868  
C, 0, 0.5267282468, -2.1527836699, -1.3372737422  
N, 0, -0.3575667454, -0.6918979176, 1.5838012517  
H, 0, 0.9565718284, -2.5590422391, -2.2611851824  
N, 0, 0.3032854277, -0.7040877417, -1.5813718807  
H, 0, 0.3850067184, -0.5162674079, 2.2614666513  
H, 0, -1.205918783, -0.3364337128, 2.0248166174  
H, 0, -0.5689251416, -3.9389114236, -1.0254953666  
H, 0, -1.4697595566, -2.7403699083, -1.9304865614  
C, 0, -0.7944236885, -2.8664119657, -1.0750474934  
C, 0, -1.4903730493, -2.4249211935, 0.2166127795  
H, 0, -2.1968147647, -3.204674865, 0.5207582962  
C, 0, 1.5249547519, -2.3491914543, -0.182492238

C,0,-0.5043916545,-2.1547519626,1.3669755337  
H,0,-2.0895956928,-1.523355375,0.0391323575  
C,0,0.852523324,-2.8027582468,1.11738784  
H,0,2.0756238579,-1.4141020219,-0.0219467092  
H,0,2.2717979109,-3.0960263952,-0.4723912845  
H,0,-0.9127126442,-2.5656034891,2.2985796215  
H,0,1.5199212665,-2.625756313,1.9700192775  
H,0,0.6835912193,-3.8863449623,1.0876655548  
H,0,1.1320112137,-0.3126658881,-2.0292006545  
H,0,-0.4470727887,-0.5803854015,-2.2619250019  
Cl,0,-0.4531615364,2.3636761572,1.7014879055  
Cl,0,0.236869195,2.3489090746,-1.7561814851

Sum of electronic and zero-point Energies= -18581.025288  
Sum of electronic and thermal Energies= -18581.012749  
Sum of electronic and thermal Enthalpies= -18581.011805  
Sum of electronic and thermal Free Energies= -18581.065970

### (1,2-DACH)PtCl(Gua) (DMF)

Pt,0,0.7780156707,0.1618012337,-1.105770499  
H,0,5.138609362,1.3940941886,2.3229904542  
N,0,-0.8133511612,-1.2092034423,-0.9333563474  
Cl,0,2.1470780569,-1.4149881161,-2.3058736203  
N,0,-0.6255587377,1.415771834,-0.0947645988  
C,0,-2.0701909097,-0.5086459144,-0.5561420171  
H,0,-0.5563751821,-1.8863286489,-0.2130654209  
H,0,-0.9431073824,-1.7466386827,-1.7907581663  
H,0,-0.1994863709,1.9650860382,0.650937593  
C,0,-1.7406868093,0.5929511865,0.4443382689  
H,0,-0.9832263158,2.0889901849,-0.7737178976  
C,0,-2.9772622256,1.4466462628,0.774554678  
H,0,-1.3504008364,0.1243246921,1.3557038333  
C,0,-4.2904432141,0.6553653295,0.6541749391  
C,0,-4.0748812493,-0.8127453284,1.0030681434  
C,0,-3.1267551094,-1.4820437796,-0.0053358264  
H,0,-2.4342263472,-0.0358530956,-1.4761448332  
H,0,-3.008492874,2.3114931702,0.0989856367  
H,0,-2.863614935,1.8457760303,1.7887049265  
H,0,-2.621198477,-2.3299177388,0.4748487504  
H,0,-3.6946977557,-1.8926034096,-0.8477549408  
H,0,-4.6802106145,0.7289453042,-0.3700645397  
H,0,-5.0473907366,1.1032065887,1.3071434598  
H,0,-5.0279978277,-1.3523507334,1.0205642367  
H,0,-3.6574450482,-0.8855347993,2.0163232798  
N,0,4.8472391022,1.7858295395,1.4332929688  
C,0,5.5766154473,2.8046644631,0.8773519367  
N,0,5.2499461412,3.3848980702,-0.2610140243  
C,0,4.1361051552,2.8734744949,-0.8088769855  
C,0,3.3327773463,1.8446268577,-0.3313229222

C,0,3.6763369356,1.2145073084,0.9052662963  
N,0,3.5572542228,3.2688068932,-1.9821609092  
C,0,2.4578551664,2.5001681513,-2.1896401292  
N,0,2.2933090917,1.6334786337,-1.2142434156  
O,0,3.104514963,0.3088735251,1.5051258215  
N,0,6.6482155246,3.24847503,1.5660205918  
H,0,3.8894047031,4.0028669981,-2.595172598  
H,0,1.8196166669,2.6032417405,-3.0546900241  
H,0,7.2654664857,3.880431047,1.0752536519  
H,0,7.0771400782,2.6769588926,2.2797202488

Sum of electronic and zero-point Energies= -18662.704507  
Sum of electronic and thermal Energies= -18662.684458  
Sum of electronic and thermal Enthalpies= -18662.683514  
Sum of electronic and thermal Free Energies= -18662.755259

***cis*-(Thiazole)<sub>2</sub>PtCl<sub>2</sub> (DMF)**

Pt,0,0.0008489461,-0.8565203995,-0.0004224706  
Cl,0,-1.7371650086,-2.5171005859,0.0100933935  
Cl,0,1.7407364967,-2.5151292694,-0.0119237245  
N,0,-1.4836040274,0.6220520256,0.0074954932  
C,0,-1.6389678731,1.4889649373,0.9516275018  
C,0,-2.4427990222,0.7522426872,-1.0886294698  
S,0,-2.8991876278,2.6433611923,0.703921941  
H,0,-1.0292451599,1.5160337409,1.8475621685  
C,0,-3.2623856331,1.9607056147,-0.8034364261  
H,0,-3.036051793,-0.1808529747,-1.1436136314  
H,0,-1.902065931,0.8096091448,-2.0487707016  
H,0,-4.0709372781,2.3393701809,-1.4133246446  
N,0,1.4837938533,0.6235320673,-0.0075981728  
C,0,2.4429430457,0.7540736653,1.0885239854  
C,0,1.6382689855,1.4910753625,-0.9513109967  
C,0,3.2610909411,1.9636896741,0.8040866195  
H,0,3.0372888998,-0.1783941953,1.1427117912  
S,0,2.897232128,2.646696183,-0.702979376  
H,0,1.0285611636,1.5179294602,-1.8472631258  
H,0,4.0692465471,2.3428831255,1.4141692305  
H,0,1.9022963475,0.8100793631,2.0487806153

Sum of electronic and zero-point Energies= -19373.371741  
Sum of electronic and thermal Energies= -19373.355390  
Sum of electronic and thermal Enthalpies= -19373.354445  
Sum of electronic and thermal Free Energies= -19373.419732

***cis*-(NH<sub>3</sub>)<sub>2</sub>Pt(CH<sub>3</sub>)Cl (DMF)**

Pt,0,-0.0102538158,0.0965610565,0.0521179637  
C,0,0.0032500648,1.6146181492,-1.3589997965  
N,0,-0.0247444566,-1.5671455735,1.6194834145

Cl,0,-0.0849951457,-1.6151013475,-1.6844477355  
N,0,0.056931403,1.6634247295,1.5627613004  
H,0,-0.8313751111,-1.5432622982,2.239500157  
H,0,0.8012517982,-1.5826594333,2.2137289368  
H,0,-0.0540476792,-2.459954405,1.1306155178  
H,0,0.8842226111,1.5836589031,2.1503943179  
H,0,-0.7506052448,1.6244899243,2.1811790205  
H,0,0.0724927591,2.5949860569,1.1529320685  
H,0,-0.0271557003,1.1955195968,-2.3697964237  
H,0,0.9173077137,2.2121800924,-1.23853965  
H,0,-0.8723790872,2.2599845487,-1.2045290913

Sum of electronic and zero-point Energies= -17927.708452  
Sum of electronic and thermal Energies= -17927.697808  
Sum of electronic and thermal Enthalpies= -17927.696863  
Sum of electronic and thermal Free Energies= -17927.746236

***cis*-(NH<sub>3</sub>)<sub>2</sub>PtBr<sub>2</sub> (DMF)**

Pt,0,-0.0000854384,-0.0243183985,0.5283149598  
Br,0,-0.0140201394,1.8271035419,-1.1719896822  
Br,0,0.0133708488,-1.8443380057,-1.2055973235  
N,0,0.0230988697,-1.5790162822,2.0140234335  
N,0,-0.0228608214,1.5028397692,2.0422905752  
H,0,-0.7591750686,-1.5220278381,2.6634120787  
H,0,0.8799217133,-1.5739994039,2.5643458625  
H,0,-0.0325167169,-2.4818350145,1.5439182983  
H,0,0.7589771198,1.4334731199,2.6909942752  
H,0,-0.8800402095,1.4878889597,2.5918817737  
H,0,0.0333298426,2.4142295524,1.5891057487

Sum of electronic and zero-point Energies= -22570.081327  
Sum of electronic and thermal Energies= -22570.071412  
Sum of electronic and thermal Enthalpies= -22570.070468  
Sum of electronic and thermal Free Energies= -22570.120296

***cis*-(NH<sub>3</sub>)<sub>2</sub>PtI<sub>2</sub> (DMF)**

Pt,0,0.,0.,0.7905912286  
I,0,-0.0107295848,1.9653120493,-1.0627397188  
I,0,0.0107295848,-1.9653120493,-1.0627397188  
N,0,0.0009188415,-1.5338212426,2.3308322125  
N,0,-0.0009188415,1.5338212426,2.3308322125  
H,0,-0.8791293134,-1.5482285695,2.8431829092  
H,0,0.7483175699,-1.4020019267,3.0098424005  
H,0,0.1244391858,-2.4566664673,1.9170480822  
H,0,0.8791293134,1.5482285695,2.8431829092  
H,0,-0.7483175699,1.4020019267,3.0098424005  
H,0,-0.1244391858,2.4566664673,1.9170480822



|                                              |               |
|----------------------------------------------|---------------|
| Sum of electronic and zero-point Energies=   | -31266.138828 |
| Sum of electronic and thermal Energies=      | -31266.129256 |
| Sum of electronic and thermal Enthalpies=    | -31266.128312 |
| Sum of electronic and thermal Free Energies= | -31266.177877 |

***cis*-(C<sub>5</sub>H<sub>5</sub>N)<sub>2</sub>PtI<sub>2</sub> (DMF)**

Pt, 0, 0.0007561884, -0.8336020783, -0.0003183585  
I, 0, 1.9583037236, -2.6943308033, -0.1197654308  
I, 0, -1.9544681467, -2.696784098, 0.1187122824  
C, 0, 1.9142296753, 1.2543660468, -1.1847854104  
C, 0, 2.0133398995, 1.1694568001, 1.1264502762  
C, 0, 2.8541697489, 2.2764029881, -1.2280236006  
H, 0, 1.475509647, 0.8486873299, -2.0903880169  
C, 0, 2.9560197735, 2.1886705859, 1.1652327396  
H, 0, 1.6522055491, 0.6961474981, 2.0335948193  
C, 0, 3.3853374445, 2.7535216301, -0.0327507275  
H, 0, 3.1585770564, 2.6830329062, -2.1868388613  
H, 0, 3.3413331638, 2.5247830039, 2.1223030832  
H, 0, 4.1224820237, 3.5511355518, -0.034665987  
C, 0, -1.9152141492, 1.2516258367, 1.1848866774  
C, 0, -2.0140166239, 1.1676732126, -1.1263987864  
C, 0, -2.8562190609, 2.2726679428, 1.22850437  
H, 0, -1.4761601381, 0.8459836794, 2.0903438486  
C, 0, -2.9577409508, 2.1859330583, -1.164802404  
H, 0, -1.6523097753, 0.6951491505, -2.0337249099  
C, 0, -3.387754305, 2.7497940622, 0.0333995658  
H, 0, -3.161142364, 2.6785350314, 2.1874788656  
H, 0, -3.3433082889, 2.5220928057, -2.1217538653  
H, 0, -4.1257094182, 3.5466573758, 0.0356060684  
N, 0, 1.5033377828, 0.7154900546, -0.0279537776  
N, 0, -1.5036450953, 0.7137143086, 0.0278463696

|                                              |               |
|----------------------------------------------|---------------|
| Sum of electronic and zero-point Energies=   | -31649.043842 |
| Sum of electronic and thermal Energies=      | -31649.027422 |
| Sum of electronic and thermal Enthalpies=    | -31649.026478 |
| Sum of electronic and thermal Free Energies= | -31649.095318 |

***cis*-(EtNH<sub>2</sub>)<sub>2</sub>Pt(OCMe)<sub>2</sub> (CHCl<sub>3</sub>)  
(PCM)**

|    |         |          |         |
|----|---------|----------|---------|
| Pt | 7.47155 | 13.76472 | 4.11711 |
| O  | 5.25217 | 12.54845 | 5.49516 |
| O  | 9.69231 | 12.55727 | 2.73355 |
| N  | 6.31325 | 15.31603 | 5.3624  |
| N  | 8.62646 | 15.32305 | 2.87754 |
| H  | 5.99867 | 16.09927 | 4.79159 |
| H  | 8.94027 | 16.10434 | 3.45143 |
| H  | 5.47743 | 14.77573 | 5.59394 |
| H  | 9.46297 | 14.78514 | 2.64295 |
| C  | 6.43759 | 12.35812 | 5.22979 |

|   |         |          |          |
|---|---------|----------|----------|
| C | 8.50739 | 12.36388 | 2.99894  |
| C | 7.14011 | 11.1805  | 5.87883  |
| C | 7.80661 | 11.18732 | 2.34612  |
| H | 6.41969 | 10.46365 | 6.29315  |
| H | 8.52809 | 10.4732  | 1.92894  |
| H | 7.75334 | 11.58032 | 6.69847  |
| H | 7.1923  | 11.58895 | 1.52817  |
| H | 7.82861 | 10.68177 | 5.19117  |
| H | 7.11931 | 10.68495 | 3.03233  |
| C | 6.94135 | 15.8245  | 6.59214  |
| C | 7.99643 | 15.83574 | 1.65054  |
| H | 7.86554 | 16.33941 | 6.30658  |
| H | 7.07165 | 16.3479  | 1.93911  |
| H | 7.23609 | 14.95562 | 7.18978  |
| H | 7.70258 | 14.96894 | 1.04946  |
| C | 6.04798 | 16.74961 | 7.40547  |
| C | 8.88755 | 16.76581 | 0.84039  |
| H | 9.80398 | 16.25483 | 0.52218  |
| H | 5.7599  | 17.63498 | 6.82534  |
| H | 6.56858 | 17.09385 | 8.3067   |
| H | 5.1321  | 16.23576 | 7.72064  |
| H | 9.17468 | 17.64914 | 1.42406  |
| H | 8.36557 | 17.11305 | -0.05889 |

***cis*-(<sup>i</sup>PrNH<sub>2</sub>)<sub>2</sub>Pt(OCMe)<sub>2</sub> (CHCl<sub>3</sub>)  
(PCM)**

|    |          |          |          |
|----|----------|----------|----------|
| C  | 10.86424 | 13.26092 | 19.89852 |
| C  | 11.53881 | 11.98737 | 20.36973 |
| C  | 9.05482  | 11.61393 | 18.1097  |
| C  | 10.15585 | 11.48277 | 17.07442 |
| C  | 6.6704   | 15.40681 | 17.31671 |
| C  | 6.35623  | 13.91882 | 17.27707 |
| C  | 4.90726  | 13.65495 | 16.87913 |
| C  | 9.05274  | 14.25796 | 22.84214 |
| C  | 8.20281  | 15.18996 | 21.99296 |
| C  | 6.73938  | 14.77553 | 21.99633 |
| N  | 6.68607  | 13.30696 | 18.58114 |
| N  | 8.71271  | 15.20584 | 20.60569 |
| O  | 11.48224 | 14.31973 | 19.993   |
| O  | 8.17265  | 10.75853 | 18.13836 |
| Pt | 8.8813   | 13.29645 | 19.30145 |
| H  | 12.61453 | 12.13858 | 20.52594 |
| H  | 11.07533 | 11.70462 | 21.32493 |
| H  | 11.36377 | 11.15515 | 19.68189 |
| H  | 9.93472  | 12.19995 | 16.2716  |
| H  | 11.13316 | 11.76119 | 17.47865 |
| H  | 10.18669 | 10.47195 | 16.6478  |
| H  | 6.05788  | 15.91508 | 18.07409 |
| H  | 7.72763  | 15.57679 | 17.55018 |
| H  | 6.45344  | 15.87156 | 16.34901 |

|   |          |          |          |
|---|----------|----------|----------|
| H | 7.01783  | 13.43947 | 16.54508 |
| H | 4.6939   | 12.58003 | 16.85092 |
| H | 4.69461  | 14.06716 | 15.88599 |
| H | 4.21648  | 14.12293 | 17.59303 |
| H | 8.99031  | 13.23121 | 22.46134 |
| H | 10.10616 | 14.56074 | 22.83802 |
| H | 8.70168  | 14.26571 | 23.8799  |
| H | 8.27747  | 16.20615 | 22.41109 |
| H | 6.32951  | 14.82917 | 23.01069 |
| H | 6.13381  | 15.43095 | 21.35735 |
| H | 6.63488  | 13.74298 | 21.6407  |
| H | 6.05212  | 13.67455 | 19.29038 |
| H | 6.51594  | 12.30064 | 18.53533 |
| H | 8.2092   | 15.91477 | 20.07452 |
| H | 9.69483  | 15.48945 | 20.59753 |

***cis*-(PhCH<sub>2</sub>NH<sub>2</sub>)<sub>2</sub>Pt(OCMe)<sub>2</sub> (CHCl<sub>3</sub>)  
(PCM)**

|    |          |          |          |
|----|----------|----------|----------|
| Pt | 7.4714   | 13.70809 | 4.1126   |
| O  | 5.30087  | 12.49883 | 5.57563  |
| O  | 9.64191  | 12.4991  | 2.64931  |
| N  | 6.31541  | 15.26138 | 5.35499  |
| N  | 8.62733  | 15.26148 | 2.87025  |
| H  | 5.99432  | 16.04458 | 4.78769  |
| H  | 8.94848  | 16.04465 | 3.43754  |
| H  | 5.48278  | 14.71765 | 5.59118  |
| H  | 9.4599   | 14.71769 | 2.634    |
| C  | 6.47489  | 12.30595 | 5.26633  |
| C  | 8.46796  | 12.30603 | 2.95879  |
| C  | 7.20327  | 11.13312 | 5.89395  |
| C  | 7.7397   | 11.13304 | 2.33135  |
| H  | 6.50083  | 10.42443 | 6.35071  |
| H  | 8.4422   | 10.42455 | 1.87435  |
| H  | 7.85873  | 11.53865 | 6.67724  |
| H  | 7.08387  | 11.5384  | 1.54828  |
| H  | 7.85455  | 10.6237  | 5.17842  |
| H  | 7.08879  | 10.62341 | 3.04707  |
| C  | 6.94261  | 15.77661 | 6.58783  |
| C  | 8.00009  | 15.77675 | 1.63745  |
| H  | 7.87615  | 16.27468 | 6.30594  |
| H  | 7.0666   | 16.2749  | 1.9194   |
| H  | 7.21048  | 14.90944 | 7.19974  |
| H  | 7.7321   | 14.9096  | 1.02557  |
| C  | 6.06062  | 16.72228 | 7.36571  |
| C  | 8.88209  | 16.72235 | 0.85951  |
| C  | 9.86509  | 16.22803 | -0.00614 |
| C  | 10.70998 | 17.0974  | -0.69336 |
| C  | 10.58074 | 18.47695 | -0.52599 |
| C  | 9.60126  | 18.98072 | 0.32918  |
| C  | 8.75813  | 18.10691 | 1.01558  |

|   |          |          |          |
|---|----------|----------|----------|
| C | 5.07757  | 16.22806 | 8.23135  |
| H | 9.9669   | 15.153   | -0.14599 |
| H | 11.4663  | 16.69835 | -1.36467 |
| H | 11.23693 | 19.15586 | -1.06465 |
| H | 9.48947  | 20.05445 | 0.45833  |
| H | 7.98939  | 18.5058  | 1.67571  |
| C | 4.2327   | 17.0975  | 8.9185   |
| C | 4.36202  | 18.47703 | 8.75108  |
| C | 5.34156  | 18.98071 | 7.89592  |
| C | 6.18467  | 18.10684 | 7.20959  |
| H | 4.9757   | 15.15304 | 8.37123  |
| H | 3.47633  | 16.69852 | 9.5898   |
| H | 3.70585  | 19.156   | 9.28968  |
| H | 5.45341  | 20.05443 | 7.76673  |
| H | 6.95345  | 18.50566 | 6.54947  |

***cis*-(PhCH<sub>2</sub>CH<sub>2</sub>NH<sub>2</sub>)<sub>2</sub>Pt(OCMe)<sub>2</sub> (CHCl<sub>3</sub>)  
(PCM)**

|    |         |          |          |
|----|---------|----------|----------|
| Pt | 7.4703  | 13.5311  | 4.11306  |
| O  | 5.28433 | 12.3314  | 5.55717  |
| O  | 9.65618 | 12.33073 | 2.6694   |
| C  | 6.45888 | 12.13055 | 5.25315  |
| C  | 8.48142 | 12.1304  | 2.97294  |
| C  | 7.1724  | 10.94924 | 5.8822   |
| C  | 7.7675  | 10.94966 | 2.34328  |
| H  | 6.45903 | 10.23201 | 6.30755  |
| H  | 7.80053 | 11.34552 | 6.69228  |
| H  | 7.84747 | 10.45231 | 5.18039  |
| H  | 8.48065 | 10.23196 | 1.91835  |
| H  | 7.14029 | 11.3465  | 1.53275  |
| H  | 7.09153 | 10.45316 | 3.04452  |
| N  | 6.3048  | 15.09273 | 5.33892  |
| C  | 6.93876 | 15.67168 | 6.52905  |
| C  | 6.01733 | 16.59565 | 7.33458  |
| C  | 6.71009 | 17.16192 | 8.54686  |
| C  | 7.39218 | 18.38227 | 8.48009  |
| C  | 8.07061 | 18.88599 | 9.58951  |
| C  | 8.07757 | 18.17309 | 10.78822 |
| C  | 7.40087 | 16.95578 | 10.86827 |
| C  | 6.72401 | 16.45676 | 9.75624  |
| H  | 5.95246 | 15.83738 | 4.73931  |
| H  | 5.49529 | 14.52857 | 5.60607  |
| H  | 7.83145 | 16.22152 | 6.20943  |
| H  | 7.28314 | 14.84541 | 7.15993  |
| H  | 5.12785 | 16.02915 | 7.63998  |
| H  | 5.67146 | 17.41113 | 6.68503  |
| H  | 7.38638 | 18.94817 | 7.54988  |
| H  | 8.59025 | 19.83853 | 9.51856  |
| H  | 8.60286 | 18.56532 | 11.65537 |

|   |         |          |          |
|---|---------|----------|----------|
| H | 7.3959  | 16.39503 | 11.79984 |
| H | 6.19354 | 15.50874 | 9.82861  |
| N | 8.63615 | 15.09251 | 2.88729  |
| C | 8.00239 | 15.67124 | 1.69695  |
| C | 8.92398 | 16.595   | 0.89135  |
| C | 8.2314  | 17.16105 | -0.32115 |
| C | 7.54932 | 18.38142 | -0.25471 |
| C | 6.87106 | 18.88495 | -1.36432 |
| C | 6.86428 | 18.17182 | -2.56291 |
| C | 7.54097 | 16.9545  | -2.64263 |
| C | 8.21765 | 16.45566 | -1.53039 |
| H | 8.98831 | 15.83728 | 3.48685  |
| H | 9.44577 | 14.5284  | 2.62037  |
| H | 7.10968 | 16.22119 | 2.01633  |
| H | 7.65806 | 14.84485 | 1.06618  |
| H | 9.81347 | 16.02839 | 0.58618  |
| H | 9.26979 | 17.4106  | 1.54077  |
| H | 7.55499 | 18.9475  | 0.67539  |
| H | 6.35141 | 19.83751 | -1.29363 |
| H | 6.33912 | 18.5639  | -3.4302  |
| H | 7.54609 | 16.39358 | -3.5741  |
| H | 8.74809 | 15.50761 | -1.6025  |

***cis*-(CH<sub>2</sub>=CHCH<sub>2</sub>NH<sub>2</sub>)<sub>2</sub>Pt(OCMe)<sub>2</sub>(CHCl<sub>3</sub>)  
(PCM)**

|    |         |          |         |
|----|---------|----------|---------|
| Pt | 7.4717  | 13.76314 | 4.11364 |
| O  | 5.21453 | 12.56144 | 5.43602 |
| O  | 9.7273  | 12.56715 | 2.784   |
| N  | 6.28371 | 15.31987 | 5.32716 |
| N  | 8.65889 | 15.32112 | 2.90033 |
| H  | 5.98705 | 16.10792 | 4.75333 |
| H  | 8.95679 | 16.10963 | 3.47286 |
| H  | 5.44148 | 14.78078 | 5.53752 |
| H  | 9.50035 | 14.78093 | 2.68955 |
| C  | 6.40532 | 12.36305 | 5.20366 |
| C  | 8.53867 | 12.36343 | 3.02323 |
| C  | 7.08585 | 11.1877  | 5.87804 |
| C  | 7.86144 | 11.18148 | 2.35729 |
| H  | 6.35216 | 10.48769 | 6.29764 |
| H  | 8.59703 | 10.48531 | 1.93471 |
| H  | 7.70066 | 11.59151 | 6.69438 |
| H  | 7.23766 | 11.5783  | 1.54437 |
| H  | 7.77167 | 10.66806 | 5.20321 |
| H  | 7.18435 | 10.65914 | 3.03884 |
| C  | 6.89072 | 15.82599 | 6.57201 |
| C  | 8.05046 | 15.82582 | 1.6556  |
| H  | 7.85067 | 16.29133 | 6.32333 |
| H  | 7.09132 | 16.29254 | 1.90495 |
| H  | 7.10726 | 14.95362 | 7.19981 |

|   |         |          |         |
|---|---------|----------|---------|
| H | 7.83207 | 14.95252 | 1.02971 |
| C | 6.01768 | 16.79881 | 7.30773 |
| C | 8.92317 | 16.79628 | 0.91635 |
| H | 9.89842 | 16.42029 | 0.60139 |
| H | 9.24317 | 18.72558 | 0.0997  |
| C | 8.57848 | 18.05597 | 0.64002 |
| H | 5.04202 | 16.42415 | 7.62293 |
| H | 7.61158 | 18.45946 | 0.93824 |
| H | 5.69692 | 18.73145 | 8.11633 |
| C | 6.36223 | 18.05953 | 7.57958 |
| H | 7.32917 | 18.46194 | 7.28001 |

***cis*-(CyNH<sub>2</sub>)<sub>2</sub>Pt(OCMe)<sub>2</sub> (CHCl<sub>3</sub>)  
(PCM)**

|    |         |          |          |
|----|---------|----------|----------|
| Pt | 7.39084 | 12.63144 | 2.12915  |
| O  | 5.07496 | 11.42947 | 3.34029  |
| O  | 9.64277 | 11.3691  | 0.86011  |
| C  | 6.27085 | 11.2194  | 3.14782  |
| C  | 8.43655 | 11.21481 | 1.04045  |
| C  | 6.90267 | 10.00375 | 3.79892  |
| C  | 7.74214 | 10.07001 | 0.32757  |
| H  | 6.14171 | 9.28265  | 4.12371  |
| H  | 7.45114 | 10.35893 | 4.68244  |
| H  | 7.63763 | 9.52231  | 3.14809  |
| H  | 8.46391 | 9.32543  | -0.03187 |
| H  | 7.21824 | 10.49893 | -0.53796 |
| H  | 6.97878 | 9.59759  | 0.95176  |
| N  | 6.21531 | 14.19246 | 3.38864  |
| C  | 6.72984 | 14.75593 | 4.65198  |
| C  | 7.01137 | 13.6477  | 5.66116  |
| C  | 7.55481 | 14.22088 | 6.96993  |
| C  | 8.80304 | 15.06925 | 6.7305   |
| C  | 8.53746 | 16.16534 | 5.69917  |
| C  | 7.98853 | 15.57915 | 4.39844  |
| H  | 5.92973 | 14.95689 | 2.7785   |
| H  | 5.37144 | 13.64545 | 3.5722   |
| H  | 5.96588 | 15.42444 | 5.08452  |
| H  | 7.7466  | 12.95735 | 5.2214   |
| H  | 6.09834 | 13.06624 | 5.84625  |
| H  | 7.77566 | 13.40455 | 7.66883  |
| H  | 6.78019 | 14.83968 | 7.44744  |
| H  | 9.6157  | 14.42198 | 6.36814  |
| H  | 9.14938 | 15.51146 | 7.67337  |
| H  | 9.45558 | 16.73042 | 5.49528  |
| H  | 7.81219 | 16.884   | 6.10938  |
| H  | 7.77685 | 16.38177 | 3.67755  |
| H  | 8.7444  | 14.92041 | 3.94444  |
| N  | 8.65351 | 14.18755 | 0.95073  |
| C  | 6.96266 | 15.7204  | 0.01381  |

|   |         |          |          |
|---|---------|----------|----------|
| C | 6.44987 | 16.40142 | -1.25508 |
| C | 6.12593 | 15.37556 | -2.34055 |
| C | 7.32557 | 14.47233 | -2.62367 |
| C | 7.8335  | 13.8041  | -1.34608 |
| C | 8.1741  | 14.84225 | -0.28209 |
| H | 8.97919 | 14.90302 | 1.59896  |
| H | 9.46642 | 13.60483 | 0.73943  |
| H | 6.17037 | 15.08264 | 0.43446  |
| H | 7.21718 | 16.47241 | 0.77432  |
| H | 7.21482 | 17.09852 | -1.6288  |
| H | 5.56415 | 17.00562 | -1.02208 |
| H | 5.8067  | 15.88364 | -3.2595  |
| H | 5.27779 | 14.75693 | -2.01095 |
| H | 8.13442 | 15.07052 | -3.06965 |
| H | 7.06118 | 13.70609 | -3.36299 |
| H | 8.71315 | 13.18283 | -1.5611  |
| H | 7.06003 | 13.13433 | -0.94146 |
| H | 8.97509 | 15.48823 | -0.68052 |

***cis*-(Me<sub>2</sub>NH)<sub>2</sub>Pt(OCMe)<sub>2</sub> (CH<sub>2</sub>Cl<sub>2</sub>)  
(PCM)**

|    |          |          |          |
|----|----------|----------|----------|
| Pt | 9.00692  | 13.26258 | 19.34054 |
| C  | 10.93258 | 13.15253 | 20.13723 |
| C  | 11.78098 | 11.90061 | 20.08212 |
| C  | 9.33887  | 11.62124 | 18.14205 |
| C  | 10.05003 | 11.8513  | 16.81851 |
| H  | 5.58478  | 13.6689  | 16.86257 |
| C  | 6.63855  | 13.52608 | 17.14402 |
| H  | 7.00403  | 12.61689 | 16.65882 |
| H  | 8.25321  | 14.02756 | 22.43597 |
| C  | 7.90356  | 14.91629 | 21.904   |
| H  | 6.85938  | 14.75583 | 21.61429 |
| N  | 6.79856  | 13.39619 | 18.5959  |
| N  | 8.72266  | 15.12532 | 20.71135 |
| O  | 11.38134 | 14.12579 | 20.74653 |
| O  | 8.92194  | 10.50071 | 18.4091  |
| H  | 12.6977  | 12.0155  | 20.67365 |
| H  | 11.19967 | 11.04577 | 20.44639 |
| H  | 12.04454 | 11.67614 | 19.04171 |
| H  | 9.50556  | 12.6058  | 16.23724 |
| H  | 11.04931 | 12.2641  | 16.99757 |
| H  | 10.12649 | 10.92225 | 16.23864 |
| H  | 7.22485  | 14.3752  | 16.78303 |
| H  | 9.05825  | 16.51856 | 19.17932 |
| H  | 8.44181  | 17.23958 | 20.69264 |
| H  | 7.35493  | 16.31469 | 19.63839 |
| H  | 7.94045  | 15.77973 | 22.58578 |
| H  | 6.04652  | 12.28634 | 20.21578 |
| H  | 6.40229  | 11.34324 | 18.75783 |

|   |         |          |          |
|---|---------|----------|----------|
| H | 4.94078 | 12.36914 | 18.81427 |
| H | 6.45151 | 14.25596 | 19.01614 |
| C | 5.99336 | 12.28844 | 19.12385 |
| C | 8.37954 | 16.36811 | 20.02321 |
| H | 9.70816 | 15.1646  | 20.98585 |

***cis*-(Et<sub>2</sub>NH)<sub>2</sub>Pt(OCMe)<sub>2</sub> (CH<sub>2</sub>Cl<sub>2</sub>)  
(PCM)**

|    |          |          |          |
|----|----------|----------|----------|
| Pt | 9.31366  | 13.45017 | 19.18197 |
| C  | 11.17173 | 13.42388 | 20.13866 |
| C  | 12.17286 | 12.2995  | 19.9815  |
| C  | 9.88261  | 11.91528 | 17.93058 |
| C  | 10.64635 | 12.27535 | 16.66623 |
| C  | 7.57954  | 14.84771 | 16.34931 |
| C  | 6.9806   | 13.54892 | 16.85559 |
| H  | 5.92177  | 13.50339 | 16.56536 |
| H  | 8.1582   | 13.62761 | 21.98758 |
| C  | 7.8341   | 14.64864 | 21.7569  |
| H  | 6.82262  | 14.57206 | 21.33636 |
| N  | 7.12577  | 13.40916 | 18.31461 |
| N  | 8.72449  | 15.15275 | 20.69795 |
| O  | 11.44579 | 14.33035 | 20.92685 |
| O  | 9.56661  | 10.74705 | 18.11975 |
| H  | 13.03675 | 12.4424  | 20.64235 |
| H  | 11.68443 | 11.34308 | 20.20161 |
| H  | 12.5132  | 12.24345 | 18.94088 |
| H  | 9.98808  | 12.85911 | 16.0097  |
| H  | 11.50161 | 12.91845 | 16.89883 |
| H  | 10.97824 | 11.3751  | 16.13282 |
| H  | 7.47722  | 12.68698 | 16.39525 |
| H  | 8.10508  | 17.16867 | 20.96189 |
| H  | 7.36784  | 16.31142 | 19.61141 |
| C  | 9.36658  | 17.03846 | 19.23095 |
| C  | 7.8061   | 15.47013 | 23.04192 |
| H  | 6.69599  | 12.16913 | 19.92476 |
| H  | 6.94799  | 11.33606 | 18.39994 |
| C  | 4.95041  | 12.14411 | 18.66307 |
| H  | 6.68248  | 14.22238 | 18.74328 |
| C  | 6.46157  | 12.20501 | 18.85502 |
| C  | 8.31262  | 16.45293 | 20.15344 |
| H  | 9.67308  | 15.23705 | 21.07835 |
| H  | 7.45941  | 14.91742 | 15.26272 |
| H  | 8.64768  | 14.91477 | 16.58334 |
| H  | 7.07839  | 15.71632 | 16.79451 |
| H  | 9.02069  | 17.99447 | 18.82292 |
| H  | 9.58318  | 16.36324 | 18.39643 |
| H  | 10.30325 | 17.22151 | 19.77045 |
| H  | 7.18533  | 14.96364 | 23.78989 |
| H  | 7.39065  | 16.47224 | 22.89469 |



|   |         |          |          |
|---|---------|----------|----------|
| H | 8.81458 | 15.57425 | 23.46005 |
| H | 4.55092 | 11.27571 | 19.19898 |
| H | 4.66131 | 12.04099 | 17.61238 |
| H | 4.46063 | 13.03852 | 19.06859 |

***cis*-(H<sub>2</sub>NCH<sub>2</sub>CH<sub>2</sub>NH<sub>2</sub>)Pt(OCMe)<sub>2</sub> (CHCl<sub>3</sub>)  
(PCM)**

|    |         |          |         |
|----|---------|----------|---------|
| Pt | 6.19932 | 10.57467 | 6.10419 |
| O  | 3.8975  | 8.97357  | 6.88882 |
| O  | 8.10095 | 9.42012  | 4.32409 |
| C  | 5.09144 | 9.14889  | 7.09934 |
| C  | 7.02367 | 9.15054  | 4.84685 |
| C  | 5.76806 | 8.36896  | 8.21435 |
| C  | 6.33368 | 7.85376  | 4.48115 |
| H  | 5.07071 | 7.66883  | 8.69306 |
| H  | 6.87754 | 7.32435  | 3.68884 |
| H  | 6.15737 | 9.07157  | 8.96235 |
| H  | 5.30414 | 8.0587   | 4.1661  |
| H  | 6.63452 | 7.82662  | 7.81815 |
| H  | 6.26423 | 7.21329  | 5.36903 |
| N  | 7.30218 | 12.32301 | 5.09871 |
| N  | 5.5343  | 12.4084  | 7.35339 |
| C  | 7.27426 | 13.48603 | 5.99541 |
| H  | 6.86225 | 12.54478 | 4.20799 |
| H  | 8.25149 | 12.02868 | 4.88323 |
| H  | 4.53922 | 12.39832 | 7.56385 |
| C  | 5.89044 | 13.62994 | 6.60937 |
| H  | 6.01298 | 12.39375 | 8.25197 |
| H  | 5.85752 | 14.52466 | 7.24519 |
| H  | 5.14725 | 13.76119 | 5.81504 |
| H  | 7.54705 | 14.41814 | 5.48264 |
| H  | 8.01365 | 13.31633 | 6.7862  |

***cis*-(Me<sub>2</sub>NCH<sub>2</sub>CH<sub>2</sub>NH<sub>2</sub>)Pt(OCMe)<sub>2</sub> (CHCl<sub>3</sub>)  
(PCM)**

|    |         |          |         |
|----|---------|----------|---------|
| Pt | 6.09268 | 10.49549 | 6.15688 |
| O  | 3.58036 | 9.15685  | 6.77607 |
| O  | 7.43034 | 9.40614  | 3.87138 |
| C  | 4.77296 | 9.19417  | 7.04224 |
| C  | 6.59651 | 9.08412  | 4.71121 |
| C  | 5.30956 | 8.34623  | 8.18407 |
| C  | 5.94705 | 7.72065  | 4.59475 |
| H  | 4.54276 | 7.65578  | 8.55864 |
| H  | 6.33904 | 7.16903  | 3.73136 |
| H  | 5.62754 | 9.01096  | 8.99816 |
| H  | 4.86136 | 7.84126  | 4.5023  |
| H  | 6.19933 | 7.79193  | 7.86695 |
| H  | 6.12097 | 7.14476  | 5.51146 |

|   |         |          |         |
|---|---------|----------|---------|
| N | 7.52572 | 12.26163 | 5.40377 |
| N | 5.56619 | 12.23466 | 7.58069 |
| C | 7.42904 | 13.31364 | 6.42817 |
| C | 7.03261 | 12.73694 | 4.10763 |
| C | 8.92072 | 11.83727 | 5.25943 |
| H | 4.56684 | 12.2679  | 7.76745 |
| C | 6.0191  | 13.49064 | 6.96298 |
| H | 6.01893 | 12.1043  | 8.48363 |
| H | 6.00712 | 14.32831 | 7.67329 |
| H | 5.32087 | 13.73719 | 6.1575  |
| H | 7.80501 | 14.27324 | 6.03506 |
| H | 8.08508 | 13.0274  | 7.2595  |
| H | 8.96672 | 11.03587 | 4.51949 |
| H | 9.28901 | 11.45591 | 6.21636 |
| H | 9.56167 | 12.67594 | 4.93881 |
| H | 7.09748 | 11.91819 | 3.38765 |
| H | 7.63089 | 13.59025 | 3.74488 |
| H | 5.9872  | 13.04649 | 4.18517 |

***cis*-(MeHNCH<sub>2</sub>CH<sub>2</sub>NHMe)Pt(OCMe)<sub>2</sub> (CHCl<sub>3</sub>)  
(PCM)**

|    |         |          |         |
|----|---------|----------|---------|
| Pt | 6.3277  | 10.5769  | 6.34268 |
| O  | 4.52833 | 9.75456  | 8.39174 |
| O  | 8.29218 | 8.62816  | 5.42752 |
| C  | 5.47363 | 9.31237  | 7.74517 |
| C  | 7.12824 | 8.98665  | 5.30333 |
| C  | 5.99318 | 7.92611  | 8.05958 |
| C  | 6.25131 | 8.30904  | 4.26282 |
| H  | 5.4745  | 7.49495  | 8.92484 |
| H  | 6.79413 | 7.50914  | 3.7423  |
| H  | 7.07262 | 7.96873  | 8.24447 |
| H  | 5.90685 | 9.05535  | 3.53536 |
| H  | 5.85384 | 7.27626  | 7.18689 |
| H  | 5.35168 | 7.90412  | 4.74122 |
| N  | 7.04484 | 12.26661 | 4.90239 |
| N  | 5.5291  | 12.4762  | 7.39549 |
| C  | 6.8861  | 13.53361 | 5.63286 |
| H  | 6.35196 | 12.24711 | 4.15503 |
| C  | 8.37318 | 12.14158 | 4.29616 |
| H  | 4.56315 | 12.24011 | 7.60911 |
| C  | 5.57404 | 13.55578 | 6.40113 |
| C  | 6.20552 | 12.80805 | 8.65144 |
| H  | 5.44218 | 14.54284 | 6.87095 |
| H  | 4.73929 | 13.40941 | 5.70546 |
| H  | 6.93342 | 14.39643 | 4.95072 |
| H  | 7.73241 | 13.62339 | 6.32339 |
| H  | 6.06529 | 11.98361 | 9.35396 |
| H  | 5.80998 | 13.73357 | 9.09643 |
| H  | 7.27821 | 12.93286 | 8.48041 |

|   |         |          |         |
|---|---------|----------|---------|
| H | 8.41576 | 11.23065 | 3.69517 |
| H | 9.12392 | 12.06148 | 5.08702 |
| H | 8.61805 | 13.00524 | 3.66036 |

***cis*-(Me<sub>2</sub>NCH<sub>2</sub>CH<sub>2</sub>NMe<sub>2</sub>)Pt(OCMe)<sub>2</sub> (CH<sub>2</sub>Cl<sub>2</sub>)  
 (PCM)**

|    |         |          |         |
|----|---------|----------|---------|
| Pt | 6.05916 | 10.43869 | 6.18883 |
| O  | 3.76655 | 8.88022  | 7.13784 |
| O  | 7.81963 | 8.29957  | 5.23462 |
| C  | 4.97102 | 9.05318  | 7.28104 |
| C  | 6.71286 | 8.80552  | 5.09256 |
| C  | 5.70974 | 8.28544  | 8.36079 |
| C  | 5.78772 | 8.28011  | 4.01129 |
| H  | 5.02037 | 7.68345  | 8.96713 |
| H  | 6.27955 | 7.51016  | 3.40255 |
| H  | 6.2688  | 8.9772   | 9.00254 |
| H  | 5.44599 | 9.10323  | 3.37205 |
| H  | 6.4535  | 7.63383  | 7.88557 |
| H  | 4.89064 | 7.86288  | 4.48538 |
| N  | 7.26742 | 12.09064 | 5.03956 |
| N  | 5.36533 | 12.3618  | 7.34256 |
| C  | 7.17699 | 13.28239 | 5.90335 |
| C  | 6.6576  | 12.344   | 3.72918 |
| C  | 8.67578 | 11.72672 | 4.85109 |
| C  | 3.91155 | 12.4092  | 7.53138 |
| C  | 5.78772 | 13.48141 | 6.48076 |
| C  | 6.02208 | 12.43049 | 8.65294 |
| H  | 5.76106 | 14.42903 | 7.04409 |
| H  | 5.05447 | 13.57221 | 5.67323 |
| H  | 7.46931 | 14.18518 | 5.34165 |
| H  | 7.90596 | 13.16184 | 6.71089 |
| H  | 5.69167 | 11.58896 | 9.26675 |
| H  | 5.76943 | 13.36975 | 9.17246 |
| H  | 7.10687 | 12.3656  | 8.54454 |
| H  | 8.74291 | 10.83857 | 4.21896 |
| H  | 9.12859 | 11.49483 | 5.81849 |
| H  | 9.23782 | 12.54794 | 4.37707 |
| H  | 6.7379  | 11.44461 | 3.11375 |
| H  | 7.1651  | 13.17494 | 3.21154 |
| H  | 5.59842 | 12.58733 | 3.83722 |
| H  | 3.59696 | 11.57499 | 8.16227 |
| H  | 3.41154 | 12.31583 | 6.56394 |
| H  | 3.60377 | 13.35478 | 8.00693 |

***cct*-[Pt(NH<sub>3</sub>)<sub>2</sub>Cl<sub>2</sub>(OOCH)<sub>2</sub>] (DMSO)  
 (PCM)**

|    |         |          |          |
|----|---------|----------|----------|
| Pt | 0.10204 | -0.16273 | -0.10496 |
| O  | 0.33427 | 1.87509  | -0.28055 |

|    |          |          |          |
|----|----------|----------|----------|
| N  | -1.95726 | 0.35076  | 0.04576  |
| Cl | 0.08659  | -0.20284 | 2.25319  |
| N  | 0.13498  | -0.06236 | -2.23175 |
| Cl | 2.39351  | -0.69423 | -0.27725 |
| O  | -0.23464 | -2.20087 | 0.00445  |
| C  | 1.19317  | 2.62604  | 0.36349  |
| C  | -1.0626  | -2.83179 | -0.7789  |
| O  | -1.24489 | -4.03627 | -0.70777 |
| O  | 2.02881  | 2.30933  | 1.18306  |
| H  | -2.29329 | 0.09355  | 0.97476  |
| H  | -2.57771 | -0.07228 | -0.64357 |
| H  | -2.02102 | 1.36639  | -0.04571 |
| H  | 0.85553  | -0.68311 | -2.60149 |
| H  | 0.39415  | 0.89864  | -2.4631  |
| H  | -0.74319 | -0.2716  | -2.70524 |
| H  | 1.05353  | 3.67615  | 0.04245  |
| H  | -1.60594 | -2.22379 | -1.52477 |

***cct*-[Pt(NH<sub>3</sub>)(Cha)Cl<sub>2</sub>(OCOCH<sub>3</sub>)<sub>2</sub>] (water)  
 (PCM)**

|    |          |          |          |
|----|----------|----------|----------|
| Pt | 0.08357  | 0.25647  | -0.01363 |
| C  | 2.95758  | -0.65415 | -0.04633 |
| C  | 4.39234  | -0.27591 | 0.23634  |
| C  | 0.13952  | -1.38741 | -2.74045 |
| Cl | 0.09612  | 2.13571  | 1.4795   |
| Cl | -0.01477 | -1.25422 | 1.79704  |
| O  | 2.63771  | -1.80791 | -0.3357  |
| N  | 0.0672   | -1.45867 | -1.26674 |
| N  | 0.19835  | 1.71347  | -1.557   |
| C  | 0.50052  | -2.77784 | -3.28071 |
| O  | -1.96526 | 0.48719  | -0.09116 |
| O  | 2.14523  | 0.36002  | 0.07577  |
| C  | -2.82831 | -0.49205 | -0.17463 |
| O  | -2.55832 | -1.67894 | -0.35142 |
| C  | -4.25028 | -0.01123 | -0.00765 |
| C  | -1.16443 | -0.89376 | -3.35813 |
| C  | -1.05801 | -0.8564  | -4.88303 |
| C  | 0.60218  | -2.74968 | -4.80689 |
| C  | -0.68167 | -2.22545 | -5.44583 |
| H  | 4.59826  | 0.75959  | -0.04252 |
| H  | 5.06397  | -0.95542 | -0.29245 |
| H  | 4.56886  | -0.37908 | 1.31336  |
| H  | 0.96479  | -0.71086 | -2.99985 |
| H  | 0.90101  | -1.94203 | -0.89584 |
| H  | -0.8023  | -1.91841 | -0.95544 |
| H  | 0.65523  | 1.39898  | -2.41183 |
| H  | -0.73677 | 2.05057  | -1.78711 |
| H  | 0.73133  | 2.50147  | -1.18734 |
| H  | -0.27626 | -3.49175 | -2.97124 |

|   |          |          |          |
|---|----------|----------|----------|
| H | 1.44764  | -3.11239 | -2.83993 |
| H | -4.93753 | -0.72322 | -0.46897 |
| H | -4.38869 | 0.9847   | -0.43432 |
| H | -4.4718  | 0.04741  | 1.06435  |
| H | -1.43732 | 0.09527  | -2.97223 |
| H | -1.97298 | -1.57623 | -3.06228 |
| H | -2.01027 | -0.51533 | -5.3061  |
| H | -0.29941 | -0.11646 | -5.17832 |
| H | 0.83097  | -3.75835 | -5.17152 |
| H | 1.44646  | -2.10914 | -5.10052 |
| H | -0.5647  | -2.16743 | -6.53503 |
| H | -1.5002  | -2.93428 | -5.25222 |

***cct*-[Pt(NH<sub>3</sub>)<sub>2</sub>Cl<sub>2</sub>(OCOCH<sub>3</sub>)<sub>2</sub>] (water)  
(PCM)**

|    |          |          |          |
|----|----------|----------|----------|
| Pt | 0.00352  | 0.19972  | -0.17191 |
| Cl | 0.02672  | 2.38849  | 0.77605  |
| Cl | 0.02622  | -0.80017 | 1.96509  |
| C  | 2.89423  | -0.65669 | -0.15571 |
| C  | 4.33029  | -0.19553 | -0.06845 |
| O  | 2.59323  | -1.84998 | -0.13987 |
| N  | -0.01625 | -1.72824 | -1.00507 |
| N  | -0.01386 | 1.13441  | -2.07627 |
| O  | -2.05406 | 0.37044  | -0.17112 |
| O  | 2.06161  | 0.34834  | -0.22604 |
| C  | -2.89509 | -0.62652 | -0.10221 |
| O  | -2.60516 | -1.82294 | -0.08225 |
| C  | -4.33392 | -0.16479 | -0.0804  |
| H  | 4.55654  | 0.03733  | 0.97842  |
| H  | -0.02767 | -1.73173 | -2.02348 |
| H  | 0.85058  | -2.16977 | -0.66734 |
| H  | -0.8799  | -2.16051 | -0.6476  |
| H  | 0.81155  | 0.89786  | -2.62674 |
| H  | -0.84912 | 0.90114  | -2.61302 |
| H  | -0.01061 | 2.14364  | -1.92078 |
| H  | -4.90676 | -0.80532 | 0.59499  |
| H  | -4.7484  | -0.2789  | -1.08846 |
| H  | -4.42492 | 0.88033  | 0.2197   |
| H  | 4.4959   | 0.70928  | -0.65748 |
| H  | 4.9951   | -0.99494 | -0.40152 |

***cct*-[Pt(NH<sub>3</sub>)<sub>2</sub>Cl<sub>2</sub>(OCOCF<sub>3</sub>)<sub>2</sub>] (water)  
(PCM)**

|    |         |          |          |
|----|---------|----------|----------|
| Pt | 0.0194  | 0.15518  | -0.11841 |
| C  | 2.88385 | -0.69388 | -0.15377 |
| C  | 4.3489  | -0.18356 | -0.03642 |
| H  | 0.00344 | -1.58299 | -2.17219 |
| H  | 0.83858 | 1.12434  | -2.48193 |

|    |          |          |          |
|----|----------|----------|----------|
| Cl | 0.03147  | 2.20908  | 1.06263  |
| Cl | 0.02737  | -1.07521 | 1.88714  |
| O  | 2.66605  | -1.88654 | -0.25602 |
| F  | 4.6377   | 0.66856  | -1.03108 |
| N  | 0.0087   | -1.68735 | -1.15836 |
| N  | 0.01237  | 1.29952  | -1.90932 |
| H  | 0.85898  | -2.18668 | -0.87524 |
| H  | -0.84111 | -2.18208 | -0.86591 |
| H  | -0.82118 | 1.12878  | -2.47254 |
| H  | 0.01651  | 2.28578  | -1.64315 |
| O  | -2.03493 | 0.31928  | -0.10221 |
| F  | 5.21369  | -1.1958  | -0.09393 |
| O  | 2.07462  | 0.3084   | -0.12533 |
| F  | 4.53533  | 0.4591   | 1.12561  |
| C  | -2.84974 | -0.67868 | -0.12163 |
| O  | -2.63945 | -1.87245 | -0.22655 |
| C  | -4.3106  | -0.16062 | 0.01274  |
| F  | -5.18148 | -1.16805 | -0.03683 |
| F  | -4.60589 | 0.69486  | -0.97707 |
| F  | -4.48049 | 0.48091  | 1.17797  |

***cct*-[Pt(NH<sub>3</sub>)<sub>2</sub>Cl<sub>2</sub>(OCOCHCl<sub>2</sub>)<sub>2</sub>] (DMSO)  
(PCM)**

|    |          |          |          |
|----|----------|----------|----------|
| Pt | -0.16228 | -0.03608 | -0.29691 |
| O  | 0.74961  | 1.76143  | -0.68406 |
| N  | -1.96518 | 1.06093  | -0.53852 |
| Cl | -0.41556 | 0.35381  | 2.02427  |
| N  | 0.08481  | -0.32779 | -2.37895 |
| Cl | 1.80922  | -1.30379 | -0.05511 |
| O  | -1.27885 | -1.74303 | 0.0671   |
| C  | 1.7424   | 2.28054  | -0.01555 |
| C  | -1.42341 | -2.7218  | -0.76303 |
| C  | 2.0071   | 3.69594  | -0.58842 |
| Cl | 3.71972  | 4.11885  | -0.47672 |
| O  | 2.37797  | 1.82294  | 0.90505  |
| Cl | 0.98698  | 4.85241  | 0.30964  |
| C  | -2.1845  | -3.87296 | -0.07113 |
| O  | -1.03913 | -2.81794 | -1.91877 |
| Cl | -3.35978 | -4.60542 | -1.17258 |
| Cl | -0.98539 | -5.06171 | 0.49733  |
| H  | -2.37603 | 1.19873  | 0.38613  |
| H  | -2.65316 | 0.58796  | -1.12454 |
| H  | -1.7651  | 1.98011  | -0.93518 |
| H  | -0.27348 | -1.27103 | -2.58588 |
| H  | 1.08007  | -0.28354 | -2.59529 |
| H  | -0.40065 | 0.36927  | -2.94214 |
| H  | 1.71486  | 3.7582   | -1.63458 |
| H  | -2.72224 | -3.51298 | 0.80326  |

**[Pt(en)Cl<sub>2</sub>(OCOCH<sub>3</sub>)<sub>2</sub>] (DMSO)**  
(PCM)

|    |          |          |          |
|----|----------|----------|----------|
| C  | 18.93229 | -0.83354 | -0.61573 |
| C  | 19.7889  | 0.19796  | -1.30888 |
| C  | 15.58711 | -1.95422 | 1.37994  |
| C  | 16.08385 | -0.61994 | 1.89606  |
| H  | 15.1648  | -2.55203 | 2.1927   |
| H  | 15.29125 | -0.07569 | 2.41882  |
| Cl | 20.29103 | -1.80961 | 3.35545  |
| Cl | 19.67217 | -4.05415 | 0.84121  |
| O  | 18.11216 | -1.51513 | -1.23506 |
| H  | 20.03205 | 1.02983  | -0.64456 |
| N  | 16.71552 | -2.71026 | 0.80091  |
| N  | 17.21869 | -0.87472 | 2.81684  |
| Pt | 18.44208 | -2.35896 | 1.94168  |
| H  | 14.81094 | -1.8116  | 0.62083  |
| H  | 16.45514 | 0.00582  | 1.08103  |
| H  | 16.98743 | -2.40266 | -0.14819 |
| H  | 16.5592  | -3.72499 | 0.86075  |
| H  | 16.90078 | -1.23793 | 3.71796  |
| H  | 17.75825 | -0.02802 | 3.00131  |
| O  | 17.82621 | -3.63322 | 3.44257  |
| H  | 19.2807  | 0.5591   | -2.20529 |
| O  | 19.17997 | -0.90913 | 0.66326  |
| H  | 20.72782 | -0.28182 | -1.60897 |
| C  | 17.12375 | -4.72065 | 3.25074  |
| O  | 16.61864 | -5.07492 | 2.1864   |
| C  | 16.9991  | -5.54618 | 4.5089   |
| H  | 16.10956 | -6.17653 | 4.45039  |
| H  | 16.96333 | -4.91568 | 5.39999  |
| H  | 17.88195 | -6.1912  | 4.58692  |

**[Pt(en)Cl<sub>2</sub>(OCOCF<sub>3</sub>)<sub>2</sub>] (water)**  
(PCM)

|    |          |          |          |
|----|----------|----------|----------|
| C  | 18.93326 | -0.93511 | -0.67292 |
| C  | 19.80697 | 0.16414  | -1.34124 |
| C  | 15.57125 | -1.99498 | 1.35452  |
| C  | 16.08948 | -0.66919 | 1.87048  |
| H  | 15.15743 | -2.59559 | 2.16898  |
| H  | 15.3101  | -0.12512 | 2.4125   |
| Cl | 20.3064  | -1.90679 | 3.25207  |
| Cl | 19.64117 | -4.12271 | 0.75499  |
| O  | 18.15801 | -1.58667 | -1.35022 |
| F  | 19.60333 | 1.35523  | -0.76048 |
| N  | 16.6851  | -2.75625 | 0.74568  |
| N  | 17.23904 | -0.93251 | 2.77145  |
| Pt | 18.443   | -2.42477 | 1.87271  |
| H  | 14.7834  | -1.84045 | 0.61065  |

|   |          |          |          |
|---|----------|----------|----------|
| H | 16.44745 | -0.03655 | 1.055    |
| H | 16.91598 | -2.45534 | -0.21066 |
| H | 16.50757 | -3.76596 | 0.76667  |
| H | 16.93563 | -1.29093 | 3.67974  |
| H | 17.78582 | -0.0879  | 2.94702  |
| O | 17.84748 | -3.7112  | 3.36855  |
| F | 19.5219  | 0.28035  | -2.63763 |
| O | 19.18026 | -0.98328 | 0.58964  |
| F | 21.10877 | -0.13598 | -1.22489 |
| C | 17.15183 | -4.77787 | 3.16265  |
| O | 16.61789 | -5.18661 | 2.14901  |
| C | 17.02687 | -5.58567 | 4.48569  |
| F | 16.29622 | -6.68552 | 4.30733  |
| F | 16.44217 | -4.84601 | 5.43967  |
| F | 18.23596 | -5.95527 | 4.93152  |

**[Pt(en)Cl<sub>2</sub>(OCOCF<sub>3</sub>)<sub>2</sub>] (MeOH)**  
(PCM)

|    |          |          |          |
|----|----------|----------|----------|
| C  | 18.99617 | -0.93445 | -0.62463 |
| C  | 19.82218 | 0.17543  | -1.33425 |
| C  | 15.58841 | -2.05046 | 1.28754  |
| C  | 16.05379 | -0.70272 | 1.79785  |
| H  | 15.16153 | -2.64757 | 2.09799  |
| H  | 15.24091 | -0.16946 | 2.30004  |
| Cl | 20.24221 | -1.8187  | 3.36116  |
| Cl | 19.72249 | -4.089   | 0.87796  |
| O  | 18.25227 | -1.61018 | -1.31701 |
| F  | 20.68151 | 0.80061  | -0.52877 |
| N  | 16.74178 | -2.79261 | 0.73216  |
| N  | 17.17554 | -0.92045 | 2.7449   |
| Pt | 18.44741 | -2.40142 | 1.91961  |
| H  | 14.82326 | -1.92899 | 0.51427  |
| H  | 16.42528 | -0.07554 | 0.98403  |
| H  | 17.00301 | -2.49818 | -0.21874 |
| H  | 16.58821 | -3.80602 | 0.76198  |
| H  | 16.8471  | -1.26749 | 3.64881  |
| H  | 17.69619 | -0.06003 | 2.92284  |
| O  | 17.82285 | -3.67791 | 3.41184  |
| F  | 18.9862  | 1.09396  | -1.84308 |
| O  | 19.20794 | -0.96427 | 0.64216  |
| F  | 20.51397 | -0.35881 | -2.34877 |
| C  | 17.15998 | -4.76373 | 3.19728  |
| O  | 16.6721  | -5.19944 | 2.1718   |
| C  | 17.00397 | -5.55389 | 4.52774  |
| F  | 16.31144 | -6.6763  | 4.33867  |
| F  | 16.35944 | -4.81513 | 5.44369  |
| F  | 18.20265 | -5.88173 | 5.02938  |



***cct*-[Pt(1,2-DACH)Cl<sub>2</sub>(OCOCH<sub>3</sub>)<sub>2</sub>] (acetone)  
(PCM)**

|    |          |          |          |
|----|----------|----------|----------|
| Pt | -0.58561 | 0.23401  | 0.2351   |
| C  | -1.98606 | -2.24048 | -0.75574 |
| C  | -3.00599 | -3.30896 | -0.44536 |
| C  | 1.80109  | -1.07537 | -0.99541 |
| C  | 1.54115  | -1.78518 | 0.33653  |
| C  | 2.80332  | -2.43415 | 0.90607  |
| C  | 4.00094  | -1.4864  | 0.9364   |
| C  | 4.2397   | -0.85966 | -0.43495 |
| C  | 2.99356  | -0.12525 | -0.92783 |
| Cl | -1.72369 | 0.81827  | 2.25637  |
| Cl | -2.23674 | 1.29314  | -1.08792 |
| O  | -1.52199 | -2.09851 | -1.8892  |
| H  | -2.91437 | -3.66449 | 0.58315  |
| N  | 0.56116  | -0.37343 | -1.41938 |
| N  | 0.93824  | -0.79249 | 1.27199  |
| H  | 2.00936  | -1.84829 | -1.74636 |
| H  | 0.76977  | -2.54755 | 0.19459  |
| H  | 3.03555  | -3.29711 | 0.26844  |
| H  | 2.58482  | -2.83619 | 1.90262  |
| H  | 3.84818  | -0.69302 | 1.68289  |
| H  | 4.88767  | -2.0405  | 1.26424  |
| H  | 5.08177  | -0.1599  | -0.39464 |
| H  | 4.51372  | -1.64353 | -1.15542 |
| H  | 2.77507  | 0.71592  | -0.2565  |
| H  | 3.16381  | 0.30627  | -1.92062 |
| H  | -0.09397 | -0.99259 | -1.92544 |
| H  | 0.74923  | 0.49823  | -1.93551 |
| H  | 1.61346  | -0.09992 | 1.60248  |
| H  | 0.54928  | -1.25102 | 2.09792  |
| O  | 0.48046  | 1.98492  | 0.46746  |
| H  | -2.90069 | -4.13749 | -1.14868 |
| O  | -1.68799 | -1.51661 | 0.28883  |
| H  | -4.00503 | -2.87367 | -0.5648  |
| C  | 0.90563  | 2.71425  | -0.534   |
| O  | 0.92386  | 2.37253  | -1.71509 |
| C  | 1.38449  | 4.07346  | -0.08447 |
| H  | 2.07918  | 4.48342  | -0.82011 |
| H  | 1.85365  | 4.02642  | 0.90093  |
| H  | 0.51557  | 4.73782  | -0.01136 |

***cct*-[Pt(1,4-DACH)Cl<sub>2</sub>(OCOCH<sub>3</sub>)<sub>2</sub>] (acetone)  
(PCM)**

|    |          |          |          |
|----|----------|----------|----------|
| Pt | -0.04486 | -0.36719 | -0.03987 |
| O  | -2.07595 | -0.67042 | 0.16546  |
| N  | -0.37634 | 1.26135  | 1.29781  |
| N  | -0.45953 | 0.69072  | -1.84552 |

|    |          |          |          |
|----|----------|----------|----------|
| Cl | 0.43766  | -1.52459 | 1.97854  |
| Cl | 0.29718  | -2.17685 | -1.54137 |
| O  | 1.87316  | 0.343    | -0.31615 |
| C  | -0.61335 | 2.67268  | 0.87457  |
| C  | -1.00121 | 2.07981  | -1.91028 |
| C  | -2.01333 | 2.87718  | 0.31157  |
| C  | 0.4773   | 3.15398  | -0.08984 |
| C  | 0.05138  | 3.12454  | -1.56486 |
| C  | -2.26562 | 2.22345  | -1.0548  |
| C  | 3.00125  | -0.33378 | -0.24655 |
| C  | 4.17879  | 0.56082  | -0.58701 |
| O  | 3.13061  | -1.51308 | 0.03154  |
| C  | -2.70095 | -1.80378 | 0.41114  |
| C  | -4.19301 | -1.56686 | 0.55431  |
| O  | -2.19609 | -2.90634 | 0.53063  |
| H  | 0.44936  | 1.22548  | 1.89757  |
| H  | -1.15791 | 0.93322  | 1.86941  |
| H  | -1.09916 | 0.05867  | -2.32941 |
| H  | 0.428    | 0.63909  | -2.35038 |
| H  | -0.54028 | 3.24369  | 1.80886  |
| H  | -1.26903 | 2.20915  | -2.96661 |
| H  | -2.13803 | 3.96374  | 0.2268   |
| H  | -2.76711 | 2.54435  | 1.03508  |
| H  | 1.38121  | 2.55621  | 0.05644  |
| H  | 0.73761  | 4.1832   | 0.17766  |
| H  | -0.39437 | 4.08917  | -1.83713 |
| H  | 0.93024  | 3.00748  | -2.21009 |
| H  | -2.98269 | 2.83808  | -1.60855 |
| H  | -2.7307  | 1.24215  | -0.92625 |
| H  | 5.11061  | 0.05868  | -0.3197  |
| H  | 4.10742  | 1.521    | -0.06851 |
| H  | 4.17763  | 0.76366  | -1.66374 |
| H  | -4.71949 | -2.52316 | 0.54077  |
| H  | -4.568   | -0.92033 | -0.24396 |
| H  | -4.38808 | -1.06435 | 1.50822  |

***cct*-Pt(NH<sub>3</sub>)<sub>2</sub>Cl<sub>2</sub>(OCONH<sup>t</sup>Bu)<sub>2</sub> (DMSO)  
(PCM)**

|    |          |          |          |
|----|----------|----------|----------|
| Pt | 0.83561  | -0.00368 | -1.0648  |
| O  | 1.02328  | 2.04578  | -0.94977 |
| Cl | -1.44295 | 0.29536  | -0.48265 |
| N  | 1.20787  | -0.21446 | 0.99846  |
| Cl | 0.51078  | 0.308    | -3.39492 |
| N  | 2.88061  | -0.23038 | -1.52043 |
| O  | 0.81017  | -2.0582  | -1.03502 |
| C  | 2.03967  | 2.5742   | -0.29129 |
| C  | -0.04309 | -2.8304  | -1.69064 |
| N  | 2.02939  | 3.92319  | -0.33556 |
| C  | 2.99926  | 4.83324  | 0.29845  |

|   |          |          |          |
|---|----------|----------|----------|
| O | 2.91385  | 1.91254  | 0.30635  |
| N | 0.22023  | -4.16921 | -1.55574 |
| O | -0.98005 | -2.44213 | -2.38687 |
| C | 2.53742  | 6.24692  | -0.05513 |
| C | 4.40261  | 4.59395  | -0.26468 |
| C | 2.98633  | 4.65222  | 1.81863  |
| C | 1.08514  | -4.87433 | -0.59514 |
| C | 0.91484  | -6.36302 | -0.90726 |
| C | 0.64035  | -4.60314 | 0.84581  |
| C | 2.55457  | -4.4937  | -0.78856 |
| H | 1.94818  | 0.45643  | 1.23765  |
| H | 1.49612  | -1.16914 | 1.21034  |
| H | 0.35936  | -0.0023  | 1.52338  |
| H | 3.17923  | -1.19137 | -1.35684 |
| H | 3.39704  | 0.42547  | -0.92239 |
| H | 3.03601  | -0.00202 | -2.50251 |
| H | 1.26628  | 4.33769  | -0.85308 |
| H | -0.51519 | -4.72862 | -1.96768 |
| H | 3.21827  | 6.98089  | 0.3871   |
| H | 1.53009  | 6.44244  | 0.33218  |
| H | 2.53136  | 6.40081  | -1.14103 |
| H | 5.10894  | 5.30363  | 0.18099  |
| H | 4.41021  | 4.73795  | -1.35123 |
| H | 4.74441  | 3.57923  | -0.04286 |
| H | 3.68032  | 5.36099  | 2.28468  |
| H | 3.2905   | 3.63856  | 2.09381  |
| H | 1.98338  | 4.83933  | 2.21918  |
| H | 1.52779  | -6.96152 | -0.22595 |
| H | 1.22589  | -6.58575 | -1.93467 |
| H | -0.12923 | -6.67679 | -0.78308 |
| H | 1.2731   | -5.15311 | 1.5521   |
| H | -0.39804 | -4.92132 | 0.99432  |
| H | 0.71037  | -3.53722 | 1.08264  |
| H | 3.18597  | -5.12063 | -0.14877 |
| H | 2.73276  | -3.44907 | -0.52242 |
| H | 2.85797  | -4.64715 | -1.83029 |

***cct*-Pt(NH<sub>3</sub>)<sub>2</sub>Cl<sub>2</sub>[OCONH(*c*-pentyl)]<sub>2</sub> (DMSO)  
 (PCM)**

|    |          |          |          |
|----|----------|----------|----------|
| Pt | -0.04384 | -0.27352 | -0.61885 |
| O  | 0.74336  | 1.58234  | -0.99264 |
| N  | -1.85822 | 0.78779  | -0.53752 |
| Cl | -0.08293 | -0.19392 | 1.74156  |
| N  | -0.0826  | -0.40171 | -2.73203 |
| Cl | 2.0187   | -1.4525  | -0.7448  |
| O  | -0.89006 | -2.15155 | -0.55169 |
| C  | 1.69658  | 2.19466  | -0.30531 |
| C  | -2.11534 | -2.40365 | -0.13094 |
| N  | 1.84455  | 3.50131  | -0.68573 |

|   |          |          |          |
|---|----------|----------|----------|
| O | 2.38518  | 1.70422  | 0.58775  |
| C | 1.24222  | 4.13355  | -1.84107 |
| C | 1.15111  | 5.6569   | -1.68314 |
| C | 1.9929   | 3.9656   | -3.16726 |
| C | 1.03171  | 6.20788  | -3.12044 |
| C | 1.33306  | 5.01507  | -4.06161 |
| N | -2.27773 | -3.71077 | 0.18447  |
| C | -3.5533  | -4.33022 | 0.46915  |
| O | -3.04074 | -1.57714 | -0.03871 |
| C | -4.07383 | -5.25495 | -0.64079 |
| C | -3.53052 | -5.24377 | 1.69647  |
| C | -5.10932 | -6.15938 | 0.05515  |
| C | -4.84646 | -6.01682 | 1.57832  |
| H | -2.57475 | 0.05267  | -0.37058 |
| H | -2.04766 | 1.31794  | -1.38633 |
| H | -1.81971 | 1.43477  | 0.24863  |
| H | -0.96    | -0.77663 | -3.09147 |
| H | 0.67321  | -1.02416 | -3.02134 |
| H | 0.08733  | 0.51924  | -3.13751 |
| H | 2.67424  | 3.93691  | -0.30271 |
| H | 0.23567  | 3.71537  | -1.95011 |
| H | 2.07377  | 6.02063  | -1.21035 |
| H | 0.32014  | 5.95307  | -1.03436 |
| H | 1.93174  | 2.94636  | -3.56464 |
| H | 3.0548   | 4.20236  | -3.00763 |
| H | 1.7441   | 7.02441  | -3.28013 |
| H | 0.03472  | 6.61838  | -3.31303 |
| H | 1.95814  | 5.29928  | -4.91468 |
| H | 0.39736  | 4.61236  | -4.47022 |
| H | -1.47188 | -4.3083  | 0.05213  |
| H | -4.26137 | -3.51219 | 0.63581  |
| H | -3.23317 | -5.85182 | -1.01968 |
| H | -4.48427 | -4.69589 | -1.4886  |
| H | -3.43138 | -4.68788 | 2.63506  |
| H | -2.6722  | -5.92677 | 1.61981  |
| H | -5.0058  | -7.1983  | -0.27523 |
| H | -6.13169 | -5.85184 | -0.19009 |
| H | -4.80635 | -6.98456 | 2.08886  |
| H | -5.65421 | -5.442   | 2.04745  |

***cct*-Pt(NH<sub>3</sub>)<sub>2</sub>Cl<sub>2</sub>[OCONH(*c*-hexyl)]<sub>2</sub> (DMSO)  
(PCM)**

|    |          |          |          |
|----|----------|----------|----------|
| Pt | -0.07968 | -0.3116  | -0.79098 |
| O  | 0.69925  | 1.55853  | -1.09986 |
| N  | -1.88582 | 0.74983  | -0.60188 |
| Cl | -0.04087 | -0.33583 | 1.57096  |
| N  | -0.19015 | -0.34586 | -2.90518 |
| Cl | 1.97483  | -1.48533 | -1.04125 |
| O  | -0.9208  | -2.19254 | -0.78153 |

|   |          |          |          |
|---|----------|----------|----------|
| C | 1.69326  | 2.1216   | -0.42736 |
| C | -2.15571 | -2.46466 | -0.40294 |
| N | 1.8481   | 3.4428   | -0.75038 |
| O | 2.40819  | 1.57644  | 0.41161  |
| C | 1.22544  | 4.13678  | -1.86772 |
| C | 1.12937  | 5.62939  | -1.55261 |
| C | 1.97155  | 3.90628  | -3.18623 |
| C | 1.3235   | 4.67487  | -4.33755 |
| C | 0.48748  | 6.40247  | -2.70456 |
| N | -2.35277 | -3.79479 | -0.25349 |
| C | 1.22607  | 6.16635  | -4.02114 |
| C | -3.62209 | -4.40179 | 0.10916  |
| O | -3.06661 | -1.63478 | -0.22661 |
| C | -3.9238  | -5.59321 | -0.80072 |
| C | -3.6445  | -4.81503 | 1.58373  |
| C | -5.24737 | -6.25886 | -0.42375 |
| C | -4.97004 | -5.47899 | 1.9559   |
| C | -5.26929 | -6.67032 | 1.04749  |
| H | -2.60208 | 0.00805  | -0.46511 |
| H | -2.08971 | 1.33316  | -1.41157 |
| H | -1.82549 | 1.34563  | 0.22245  |
| H | -1.08183 | -0.69966 | -3.25071 |
| H | 0.55078  | -0.95976 | -3.2465  |
| H | -0.02739 | 0.59052  | -3.27668 |
| H | 2.70196  | 3.84334  | -0.38231 |
| H | 0.20991  | 3.73435  | -1.9632  |
| H | 2.1421   | 6.02266  | -1.37092 |
| H | 0.56027  | 5.77151  | -0.62522 |
| H | 2.004    | 2.83133  | -3.40481 |
| H | 3.01313  | 4.23973  | -3.06057 |
| H | 1.89273  | 4.51466  | -5.26203 |
| H | 0.31378  | 4.2757   | -4.51829 |
| H | 0.46386  | 7.47303  | -2.46483 |
| H | -0.55977 | 6.08293  | -2.81452 |
| H | -1.54171 | -4.39009 | -0.35701 |
| H | 0.72203  | 6.69748  | -4.83882 |
| H | 2.24017  | 6.58761  | -3.94844 |
| H | -4.3825  | -3.62897 | -0.05187 |
| H | -3.10819 | -6.32755 | -0.7107  |
| H | -3.94073 | -5.26008 | -1.84614 |
| H | -3.46018 | -3.93367 | 2.21093  |
| H | -2.81666 | -5.5173  | 1.76521  |
| H | -5.42126 | -7.12946 | -1.06863 |
| H | -6.07247 | -5.55656 | -0.61568 |
| H | -4.94709 | -5.79334 | 3.00701  |
| H | -5.78249 | -4.74201 | 1.86686  |
| H | -6.24216 | -7.10916 | 1.30365  |
| H | -4.51491 | -7.45359 | 1.21648  |

***cct*-Pt(NH<sub>3</sub>)<sub>2</sub>Cl<sub>2</sub>(OCONHPh)<sub>2</sub> (DMSO)  
(PCM)**

|    |          |          |          |
|----|----------|----------|----------|
| Pt | 0.67311  | -1.21827 | 0.06264  |
| Cl | 2.73087  | -0.0361  | 0.1142   |
| Cl | -0.62591 | 0.76709  | -0.01119 |
| O  | 0.76814  | -1.14174 | -1.98927 |
| O  | 0.6296   | -1.07981 | 2.11304  |
| N  | 1.77495  | -3.01085 | 0.12683  |
| N  | -1.12151 | -2.31777 | 0.01878  |
| C  | 0.53839  | -2.21407 | -2.71356 |
| C  | 0.35079  | -2.13012 | 2.85222  |
| N  | 0.65371  | -1.9387  | -4.04463 |
| O  | 0.2535   | -3.3343  | -2.26138 |
| C  | 0.49093  | -2.79138 | -5.14732 |
| C  | 0.67432  | -2.22344 | -6.41706 |
| C  | 0.16217  | -4.14901 | -5.04326 |
| C  | 0.02273  | -4.91276 | -6.20214 |
| C  | 0.20424  | -4.3516  | -7.46481 |
| N  | 0.37679  | -1.81471 | 4.17914  |
| C  | 0.53173  | -2.99839 | -7.56279 |
| C  | 0.13918  | -2.63389 | 5.29357  |
| O  | 0.09587  | -3.26376 | 2.41585  |
| C  | 0.23803  | -2.02791 | 6.5551   |
| C  | -0.18407 | -3.99417 | 5.20858  |
| C  | -0.40205 | -4.72274 | 6.37796  |
| C  | 0.01773  | -2.76807 | 7.71147  |
| C  | -0.30464 | -4.12375 | 7.6325   |
| H  | 1.5381   | -3.54609 | -0.71514 |
| H  | 1.48142  | -3.52074 | 0.96668  |
| H  | 2.77564  | -2.81833 | 0.15765  |
| H  | -1.92646 | -1.69317 | -0.01773 |
| H  | -1.15017 | -2.89104 | 0.8685   |
| H  | -1.09359 | -2.91639 | -0.81331 |
| H  | 0.89144  | -0.97817 | -4.25522 |
| H  | 0.92985  | -1.16928 | -6.50442 |
| H  | 0.01895  | -4.595   | -4.06763 |
| H  | -0.23271 | -5.96537 | -6.10715 |
| H  | 0.09265  | -4.95771 | -8.35961 |
| H  | 0.60073  | -0.84801 | 4.3762   |
| H  | 0.67826  | -2.53824 | -8.53662 |
| H  | 0.48886  | -0.9715  | 6.62765  |
| H  | -0.26231 | -4.46941 | 4.23941  |
| H  | -0.65225 | -5.77784 | 6.29776  |
| H  | 0.09944  | -2.27874 | 8.67866  |
| H  | -0.4769  | -4.70269 | 8.53563  |

**Pt(1,2-DACH)<sub>2</sub>(OH)<sub>2</sub>(oxalate)<sub>2</sub> (DMF)  
(PCM) 6-31G(d,p)(E)**

|    |   |          |          |          |
|----|---|----------|----------|----------|
| Pt | 0 | -0.43283 | -0.04052 | 0.11348  |
| C  | 0 | -3.03919 | 0.89396  | -0.4486  |
| C  | 0 | -3.18333 | -0.62413 | -0.16972 |
| C  | 0 | 2.37958  | -0.9418  | 0.53567  |
| C  | 0 | 2.34718  | 0.54364  | 0.89864  |
| C  | 0 | 3.70347  | 1.21005  | 0.66917  |
| C  | 0 | 4.26135  | 0.93952  | -0.72776 |
| C  | 0 | 4.30122  | -0.55738 | -1.02772 |
| C  | 0 | 2.92254  | -1.19803 | -0.8662  |
| O  | 0 | -1.82308 | 1.37936  | -0.37182 |
| O  | 0 | -2.07601 | -1.26115 | 0.12324  |
| O  | 0 | -4.01063 | 1.56772  | -0.72223 |
| O  | 0 | -4.27068 | -1.16089 | -0.22277 |
| N  | 0 | 0.9967   | -1.47163 | 0.67862  |
| N  | 0 | 1.26241  | 1.18266  | 0.10449  |
| H  | 0 | 3.0169   | -1.45374 | 1.26661  |
| H  | 0 | 2.04097  | 0.65034  | 1.94352  |
| H  | 0 | 4.39286  | 0.81179  | 1.42339  |
| H  | 0 | 3.6178   | 2.28463  | 0.8638   |
| H  | 0 | 3.65837  | 1.45331  | -1.4893  |
| H  | 0 | 5.26494  | 1.36986  | -0.80274 |
| H  | 0 | 4.66835  | -0.73341 | -2.04348 |
| H  | 0 | 5.01152  | -1.04472 | -0.34647 |
| H  | 0 | 2.21965  | -0.80547 | -1.61219 |
| H  | 0 | 2.98399  | -2.27995 | -1.03016 |
| H  | 0 | 0.76249  | -1.61098 | 1.66339  |
| H  | 0 | 0.88281  | -2.35836 | 0.18928  |
| H  | 0 | 1.49939  | 1.26123  | -0.88623 |
| H  | 0 | 1.05408  | 2.11653  | 0.45462  |
| O  | 0 | -0.07904 | -0.30351 | -1.87403 |
| H  | 0 | -0.66642 | 0.33292  | -2.30235 |
| O  | 0 | -0.6249  | 0.22711  | 2.12261  |
| H  | 0 | -1.43662 | -0.23873 | 2.36087  |

**Pt(NH<sub>3</sub>)<sub>2</sub>Cl<sub>2</sub>(OH)<sub>2</sub> (water)**  
**(PCM) 6-31G(d,p)(E)**

|    |   |          |          |          |
|----|---|----------|----------|----------|
| Pt | 0 | 0.46988  | -0.05956 | 0.04109  |
| O  | 0 | 0.48987  | -0.29268 | -1.98382 |
| N  | 0 | 1.852    | 1.50376  | -0.20439 |
| O  | 0 | 0.74942  | 0.18336  | 2.04554  |
| N  | 0 | 1.97174  | -1.52807 | 0.08985  |
| H  | 0 | 2.46814  | 1.35912  | -1.00065 |
| H  | 0 | 2.39303  | 1.6064   | 0.65157  |
| H  | 0 | 1.31331  | 2.35491  | -0.35387 |
| H  | 0 | 1.51501  | -2.41199 | 0.30682  |
| H  | 0 | 2.67906  | -1.34006 | 0.79619  |
| H  | 0 | 2.39768  | -1.59877 | -0.83183 |
| H  | 0 | -0.37312 | -0.66344 | -2.20512 |
| H  | 0 | -0.09791 | 0.49783  | 2.3837   |

|    |   |          |          |          |
|----|---|----------|----------|----------|
| Cl | 0 | -1.22985 | 1.59332  | -0.00709 |
| Cl | 0 | -1.09586 | -1.81979 | 0.31219  |

**Pt(<sup>i</sup>PrNH<sub>2</sub>)<sub>2</sub>Cl<sub>2</sub>(OH)<sub>2</sub> (water)**  
 (PCM) 6-31G(d,p)(E)

|    |   |          |          |          |
|----|---|----------|----------|----------|
| Pt | 0 | -0.17734 | 0.31731  | -0.20533 |
| O  | 0 | 1.83349  | 0.67308  | -0.19148 |
| N  | 0 | 0.25532  | -0.69004 | 1.61184  |
| O  | 0 | -2.14406 | -0.23004 | -0.16345 |
| N  | 0 | 0.04096  | -1.40937 | -1.41321 |
| H  | 0 | 0.68307  | 0.076    | 2.13324  |
| H  | 0 | 1.00721  | -1.35342 | 1.42251  |
| C  | 0 | -0.81738 | -1.31701 | 2.42703  |
| C  | 0 | 1.35265  | -2.09667 | -1.56314 |
| H  | 0 | -0.29722 | -1.09002 | -2.32284 |
| H  | 0 | -0.67671 | -2.03399 | -1.04598 |
| H  | 0 | 1.90912  | 1.60735  | 0.04082  |
| H  | 0 | 0.54016  | -2.30768 | 3.80736  |
| Cl | 0 | -0.50412 | 2.24904  | 1.15152  |
| Cl | 0 | -0.58354 | 1.51106  | -2.2255  |
| C  | 0 | -0.28075 | -1.5829  | 3.82958  |
| C  | 0 | -1.3282  | -2.57871 | 1.75404  |
| H  | 0 | -1.62189 | -0.57732 | 2.47173  |
| C  | 0 | 2.20064  | -1.35742 | -2.58295 |
| C  | 0 | 1.11813  | -3.55536 | -1.93601 |
| H  | 0 | 1.84865  | -2.04748 | -0.58817 |
| H  | 0 | -1.07952 | -1.99488 | 4.45235  |
| H  | 0 | 0.07762  | -0.66496 | 4.30555  |
| H  | 0 | -2.56891 | 0.37469  | -0.78532 |
| H  | 0 | -2.06465 | -3.06219 | 2.40113  |
| H  | 0 | -0.51566 | -3.29505 | 1.58529  |
| H  | 0 | -1.82102 | -2.34116 | 0.8089   |
| H  | 0 | 3.17687  | -1.84248 | -2.66398 |
| H  | 0 | 2.34725  | -0.3214  | -2.27155 |
| H  | 0 | 1.7292   | -1.38437 | -3.57212 |
| H  | 0 | 2.08041  | -4.06774 | -2.02008 |
| H  | 0 | 0.6047   | -3.63583 | -2.89981 |
| H  | 0 | 0.52461  | -4.07605 | -1.17777 |

**Pt(hpip)<sub>2</sub>Cl<sub>2</sub>(OH)<sub>2</sub> (water)**  
 (PCM) 6-31G(d,p)(E)

|    |   |          |          |          |
|----|---|----------|----------|----------|
| Pt | 0 | -0.05128 | -0.36498 | 0.02145  |
| Cl | 0 | 1.45534  | 0.72564  | -1.46809 |
| Cl | 0 | 1.17489  | 0.36846  | 1.92831  |
| N  | 0 | -1.53782 | -1.47579 | 1.07315  |
| C  | 0 | -1.57138 | -2.8079  | 0.41657  |
| C  | 0 | -1.43894 | -2.64863 | -1.11057 |
| N  | 0 | -1.32529 | -1.21082 | -1.46561 |



|   |   |          |          |          |
|---|---|----------|----------|----------|
| C | 0 | -2.6333  | -0.51059 | -1.51314 |
| C | 0 | -3.51176 | -0.87415 | -0.32051 |
| C | 0 | -2.84624 | -0.77547 | 1.04827  |
| O | 0 | -1.19741 | 1.32935  | 0.09823  |
| O | 0 | 1.05915  | -2.08302 | -0.06087 |
| H | 0 | -1.21781 | -1.57122 | 2.03584  |
| H | 0 | -2.49607 | -3.31882 | 0.70192  |
| H | 0 | -0.72052 | -3.37236 | 0.7913   |
| H | 0 | -0.52399 | -3.1346  | -1.4423  |
| H | 0 | -2.28932 | -3.07952 | -1.64787 |
| H | 0 | -0.85072 | -1.11065 | -2.36182 |
| H | 0 | -3.13842 | -0.80588 | -2.4392  |
| H | 0 | -2.42017 | 0.55907  | -1.53531 |
| H | 0 | -3.92359 | -1.87936 | -0.45863 |
| H | 0 | -4.37244 | -0.19923 | -0.32229 |
| H | 0 | -2.65655 | 0.26324  | 1.32256  |
| H | 0 | -3.49156 | -1.24287 | 1.79992  |
| H | 0 | -0.54899 | 2.03825  | 0.19162  |
| H | 0 | 1.95602  | -1.77771 | 0.1202   |

**Pt(mhpip)<sub>2</sub>Cl<sub>2</sub>(OH)<sub>2</sub> (water)**  
**(PCM) 6-31G(d,p)(E)**

|    |   |          |          |          |
|----|---|----------|----------|----------|
| Pt | 0 | 0.00852  | -0.35915 | -0.02811 |
| Cl | 0 | 1.46165  | 0.62937  | -1.63987 |
| Cl | 0 | 1.36656  | 0.50359  | 1.73795  |
| N  | 0 | -1.47126 | -1.45105 | 1.11884  |
| C  | 0 | -1.53146 | -2.77841 | 0.44239  |
| C  | 0 | -1.43399 | -2.64352 | -1.08707 |
| N  | 0 | -1.29384 | -1.21754 | -1.46728 |
| C  | 0 | -2.58773 | -0.49675 | -1.5217  |
| C  | 0 | -3.45454 | -0.83941 | -0.3175  |
| C  | 0 | -2.77512 | -0.73069 | 1.04184  |
| C  | 0 | -1.07138 | -1.61322 | 2.52707  |
| O  | 0 | -1.11718 | 1.35034  | 0.04906  |
| O  | 0 | 1.09753  | -2.09076 | -0.08899 |
| H  | 0 | -2.45131 | -3.28233 | 0.75839  |
| H  | 0 | -0.67696 | -3.35109 | 0.79839  |
| H  | 0 | -0.53865 | -3.15688 | -1.43012 |
| H  | 0 | -2.3065  | -3.06234 | -1.59789 |
| H  | 0 | -0.81509 | -1.13972 | -2.36363 |
| H  | 0 | -3.10265 | -0.79523 | -2.44146 |
| H  | 0 | -2.36074 | 0.56972  | -1.56013 |
| H  | 0 | -3.88027 | -1.84062 | -0.44053 |
| H  | 0 | -4.30761 | -0.15459 | -0.31204 |
| H  | 0 | -2.56877 | 0.31084  | 1.29336  |
| H  | 0 | -3.43225 | -1.16876 | 1.80268  |
| H  | 0 | -1.77786 | -2.28346 | 3.02968  |
| H  | 0 | -1.07949 | -0.638   | 3.01369  |
| H  | 0 | -0.06542 | -2.02995 | 2.56692  |

|   |   |         |          |         |
|---|---|---------|----------|---------|
| H | 0 | -0.4882 | 2.0163   | 0.35424 |
| H | 0 | 2.00669 | -1.78096 | -0.1781 |

**Pt(dmhip)<sub>2</sub>Cl<sub>2</sub>(OH)<sub>2</sub> (water)**  
 (PCM) 6-31G(d,p)(E)

|    |   |          |          |          |
|----|---|----------|----------|----------|
| Pt | 0 | -0.46261 | 0.00013  | -0.00727 |
| Cl | 0 | -2.18552 | 1.64688  | -0.17413 |
| Cl | 0 | -2.18109 | -1.65122 | -0.17692 |
| N  | 0 | 1.23556  | -1.32303 | 0.20686  |
| C  | 0 | 1.9917   | -0.76036 | 1.35749  |
| C  | 0 | 1.99332  | 0.7746   | 1.3497   |
| N  | 0 | 1.23457  | 1.32642  | 0.19556  |
| C  | 0 | 2.03585  | 1.28572  | -1.05936 |
| C  | 0 | 2.82553  | -0.00389 | -1.22008 |
| C  | 0 | 2.03831  | -1.29335 | -1.0473  |
| C  | 0 | 0.82696  | -2.70733 | 0.50324  |
| C  | 0 | 0.82544  | 2.71295  | 0.48016  |
| O  | 0 | -0.28707 | -0.00738 | -2.04836 |
| O  | 0 | -0.59233 | 0.00695  | 2.03493  |
| H  | 0 | 3.00432  | -1.17808 | 1.3399   |
| H  | 0 | 1.48802  | -1.10195 | 2.26001  |
| H  | 0 | 1.49281  | 1.1259   | 2.25009  |
| H  | 0 | 3.00664  | 1.19018  | 1.3242   |
| H  | 0 | 2.73441  | 2.13051  | -1.02715 |
| H  | 0 | 1.33494  | 1.42678  | -1.88385 |
| H  | 0 | 3.68623  | 0.00012  | -0.54342 |
| H  | 0 | 3.2453   | -0.0082  | -2.23061 |
| H  | 0 | 1.33806  | -1.44275 | -1.87084 |
| H  | 0 | 2.73822  | -2.13661 | -1.00584 |
| H  | 0 | 1.7175   | -3.29938 | 0.74248  |
| H  | 0 | 0.32807  | -3.12793 | -0.36941 |
| H  | 0 | 0.13939  | -2.70477 | 1.34824  |
| H  | 0 | 1.71592  | 3.30796  | 0.71217  |
| H  | 0 | 0.13973  | 2.71741  | 1.32669  |
| H  | 0 | 0.32431  | 3.12538  | -0.39512 |
| H  | 0 | -1.20365 | -0.04566 | -2.34883 |
| H  | 0 | -1.54039 | 0.07286  | 2.20028  |

**Pt(1,4-DACH)<sub>2</sub>(OH)<sub>2</sub>Cl<sub>2</sub> (water)**  
 (PCM) 6-31G(d,p)(E)

|    |   |          |          |          |
|----|---|----------|----------|----------|
| Pt | 0 | 0.46517  | 0.34396  | -0.21232 |
| O  | 0 | 0.60241  | 0.5973   | 1.81003  |
| N  | 0 | -1.16606 | 1.67806  | -0.0949  |
| N  | 0 | -0.60635 | -1.45602 | 0.04544  |
| Cl | 0 | 1.75727  | 2.31664  | -0.57164 |
| Cl | 0 | 2.38002  | -1.07592 | -0.29813 |
| O  | 0 | 0.13765  | 0.05782  | -2.20826 |
| C  | 0 | -2.59174 | 1.24833  | -0.09643 |
| C  | 0 | -2.03968 | -1.51909 | 0.44396  |

|   |   |          |          |          |
|---|---|----------|----------|----------|
| C | 0 | -3.00472 | 0.70369  | 1.26444  |
| C | 0 | -2.85883 | 0.24484  | -1.22811 |
| C | 0 | -2.95337 | -1.20313 | -0.73268 |
| C | 0 | -2.31197 | -0.60857 | 1.65054  |
| H | 0 | 1.48841  | 0.95536  | 1.94633  |
| H | 0 | -0.99147 | 2.30808  | -0.87686 |
| H | 0 | -0.94533 | 2.18898  | 0.76183  |
| H | 0 | -0.03401 | -1.95732 | 0.72365  |
| H | 0 | -0.46514 | -1.9045  | -0.86157 |
| H | 0 | 1.02252  | 0.00502  | -2.59037 |
| H | 0 | -3.16006 | 2.16666  | -0.28471 |
| H | 0 | -2.20326 | -2.56358 | 0.73388  |
| H | 0 | -4.08867 | 0.55146  | 1.21185  |
| H | 0 | -2.84274 | 1.45898  | 2.04129  |
| H | 0 | -2.07291 | 0.33658  | -1.98369 |
| H | 0 | -3.80049 | 0.51067  | -1.71642 |
| H | 0 | -3.97217 | -1.41336 | -0.38809 |
| H | 0 | -2.76398 | -1.89785 | -1.55832 |
| H | 0 | -2.94901 | -1.14653 | 2.35809  |
| H | 0 | -1.36927 | -0.40235 | 2.16606  |

**Pt(1,4-DACH)<sub>2</sub>(OH)<sub>2</sub>Cl<sub>2</sub> (DMF)**  
(PCM) 6-31G(d,p)(E)

|    |   |          |          |          |
|----|---|----------|----------|----------|
| Pt | 0 | 0.46495  | 0.34392  | -0.21229 |
| O  | 0 | 0.60049  | 0.59884  | 1.80992  |
| N  | 0 | -1.16654 | 1.67839  | -0.0961  |
| N  | 0 | -0.60636 | -1.45643 | 0.04671  |
| Cl | 0 | 1.7558   | 2.31566  | -0.57551 |
| Cl | 0 | 2.37938  | -1.07531 | -0.29397 |
| O  | 0 | 0.13643  | 0.05574  | -2.20772 |
| C  | 0 | -2.59198 | 1.24833  | -0.09745 |
| C  | 0 | -2.03963 | -1.51913 | 0.44501  |
| C  | 0 | -3.00497 | 0.70432  | 1.26372  |
| C  | 0 | -2.85833 | 0.24382  | -1.22849 |
| C  | 0 | -2.9532  | -1.20378 | -0.73195 |
| C  | 0 | -2.31176 | -0.60743 | 1.65082  |
| H  | 0 | 1.49377  | 0.93698  | 1.94929  |
| H  | 0 | -0.99137 | 2.30715  | -0.87891 |
| H  | 0 | -0.94536 | 2.19003  | 0.76008  |
| H  | 0 | -0.03369 | -1.95631 | 0.72566  |
| H  | 0 | -0.46436 | -1.90542 | -0.85992 |
| H  | 0 | 1.02054  | 0.02399  | -2.5938  |
| H  | 0 | -3.16107 | 2.16609  | -0.28644 |
| H  | 0 | -2.2039  | -2.5633  | 0.73584  |
| H  | 0 | -4.0889  | 0.55172  | 1.21113  |
| H  | 0 | -2.84329 | 1.46006  | 2.04021  |
| H  | 0 | -2.07171 | 0.3349   | -1.98345 |
| H  | 0 | -3.79964 | 0.50912  | -1.71784 |

|   |   |          |          |          |
|---|---|----------|----------|----------|
| H | 0 | -3.9721  | -1.41364 | -0.38736 |
| H | 0 | -2.76383 | -1.89901 | -1.55719 |
| H | 0 | -2.94838 | -1.14472 | 2.3593   |
| H | 0 | -1.3688  | -0.40038 | 2.1656   |

### Output file for NMR calculation of $[\text{PtCl}_4]^{2-}$

Entering Link 1 = C:\G03W\l1.exe PID= 6248.

Copyright (c) 1988,1990,1992,1993,1995,1998,2003,2004,2007,  
Gaussian, Inc.

All Rights Reserved.

This is the Gaussian(R) 03 program. It is based on the the Gaussian(R) 98 system (copyright 1998, Gaussian, Inc.), the Gaussian(R) 94 system (copyright 1995, Gaussian, Inc.), the Gaussian 92(TM) system (copyright 1992, Gaussian, Inc.), the Gaussian 90(TM) system (copyright 1990, Gaussian, Inc.), the Gaussian 88(TM) system (copyright 1988, Gaussian, Inc.), the Gaussian 86(TM) system (copyright 1986, Carnegie Mellon University), and the Gaussian 82(TM) system (copyright 1983, Carnegie Mellon University). Gaussian is a federally registered trademark of Gaussian, Inc.

This software contains proprietary and confidential information, including trade secrets, belonging to Gaussian, Inc.

This software is provided under written license and may be used, copied, transmitted, or stored only in accord with that written license.

The following legend is applicable only to US Government contracts under FAR:

#### RESTRICTED RIGHTS LEGEND

Use, reproduction and disclosure by the US Government is subject to restrictions as set forth in subparagraphs (a) and (c) of the Commercial Computer Software - Restricted Rights clause in FAR 52.227-19.

Gaussian, Inc.  
340 Quinnipiac St., Bldg. 40, Wallingford CT 06492

-----  
Warning -- This program may not be used in any manner that competes with the business of Gaussian, Inc. or will provide assistance to any competitor of Gaussian, Inc. The licensee of this program is prohibited from giving any competitor of

Gaussian, Inc. access to this program. By using this program, the user acknowledges that Gaussian, Inc. is engaged in the business of creating and licensing software in the field of computational chemistry and represents and warrants to the licensee that it is not a competitor of Gaussian, Inc. and that it will not use this program in any manner prohibited above.

-----

Cite this work as:

Gaussian 03, Revision E.01,

M. J. Frisch, G. W. Trucks, H. B. Schlegel, G. E. Scuseria, M. A. Robb, J. R. Cheeseman, J. A. Montgomery, Jr., T. Vreven, K. N. Kudin, J. C. Burant, J. M. Millam, S. S. Iyengar, J.

Tomasi,

V. Barone, B. Mennucci, M. Cossi, G. Scalmani, N. Rega, G. A. Petersson, H. Nakatsuji, M. Hada, M. Ehara, K. Toyota, R. Fukuda, J. Hasegawa, M. Ishida, T. Nakajima, Y. Honda, O.

Kitao,

H. Nakai, M. Klene, X. Li, J. E. Knox, H. P. Hratchian, J. B.

Cross,

V. Bakken, C. Adamo, J. Jaramillo, R. Gomperts, R. E. Stratmann, O. Yazyev, A. J. Austin, R. Cammi, C. Pomelli, J. W. Ochterski, P. Y. Ayala, K. Morokuma, G. A. Voth, P. Salvador, J. J.

Dannenberg,

V. G. Zakrzewski, S. Dapprich, A. D. Daniels, M. C. Strain, O. Farkas, D. K. Malick, A. D. Rabuck, K. Raghavachari, J. B. Foresman, J. V. Ortiz, Q. Cui, A. G. Baboul, S. Clifford, J. Cioslowski, B. B. Stefanov, G. Liu, A. Liashenko, P. Piskorz, I. Komaromi, R. L. Martin, D. J. Fox, T. Keith, M. A. Al-Laham, C. Y. Peng, A. Nanayakkara, M. Challacombe, P. M. W. Gill, B. Johnson, W. Chen, M. W. Wong, C. Gonzalez, and J. A. Pople, Gaussian, Inc., Wallingford CT, 2004.

\*\*\*\*\*

Gaussian 03: IA32W-G03RevE.01 11-Sep-2007

17-Jan-2014

\*\*\*\*\*

%chk=PtCl4\_2-PBE0\_SARCZORANMR

%nproc=2

Will use up to 2 processors via shared memory.

%mem=800mb

-----

-----  
#p PBE1PBE/gen nmr=giao integral(ultrafine) SCRF(solvent=water)  
SCF(No

VarAcc,maxcycles=1000)  
-----

-----  
1/38=1/1;

2/17=6,18=5,40=1/2;  
3/5=7,11=2,16=1,25=1,30=1,70=2201,72=1,74=-13,75=5/1,2,8,3;  
4//1;  
5/5=2,7=1000,38=1,53=1/2;  
8/6=1,10=90,11=11/1;  
10/13=100,45=16/2;  
6/7=2,8=2,9=2,10=2,28=1/1;  
99/9=1/99;

Leave Link 1 at Fri Jan 17 09:22:40 2014, MaxMem= 104857600  
cpu: 0.0

(Enter C:\G03W\l101.exe)

-----  
PtCl4\_2-PBE0\_SARCZORANMR  
-----

Symbolic Z-matrix:

Charge = -2 Multiplicity = 1

|    |         |         |    |
|----|---------|---------|----|
| Pt | 0.      | 0.      | 0. |
| Cl | 0.      | 2.4384  | 0. |
| Cl | 2.4384  | 0.      | 0. |
| Cl | -2.4384 | 0.      | 0. |
| Cl | 0.      | -2.4384 | 0. |

Isotopes and Nuclear Properties:

(Nuclear quadrupole moments (NQMom) in fm\*\*2, nuclear magnetic moments (NMagM) in nuclear magnetons)

| Atom       | 1           | 2          | 3          | 4          | 5 |
|------------|-------------|------------|------------|------------|---|
| IAtWgt=    | 195         | 35         | 35         | 35         |   |
| 35         |             |            |            |            |   |
| AtmWgt=    | 194.9648000 | 34.9688527 | 34.9688527 | 34.9688527 |   |
| 34.9688527 |             |            |            |            |   |
| NucSpn=    | 1           | 3          | 3          | 3          |   |
| 3          |             |            |            |            |   |
| AtZEff=    | 0.0000000   | 0.0000000  | 0.0000000  | 0.0000000  |   |
| 0.0000000  |             |            |            |            |   |
| NQMom=     | 0.0000000   | -8.1650000 | -8.1650000 | -8.1650000 | - |
| 8.1650000  |             |            |            |            |   |
| NMagM=     | 0.6095000   | 0.8218740  | 0.8218740  | 0.8218740  |   |
| 0.8218740  |             |            |            |            |   |

Leave Link 101 at Fri Jan 17 09:22:40 2014, MaxMem= 104857600  
cpu: 0.0

(Enter C:\G03W\l202.exe)

Input orientation:

-----  
-----  
Center Atomic Atomic Coordinates  
(Angstroms) Number Number Type X Y  
Z

```

-----
-----
      1      78      0      0.000000      0.000000
0.000000
      2      17      0      0.000000      2.438400
0.000000
      3      17      0      2.438400      0.000000
0.000000
      4      17      0      -2.438400      0.000000
0.000000
      5      17      0      0.000000      -2.438400
0.000000
-----
-----
    
```

```

-----
-----
                        Distance matrix (angstroms):
                        1          2          3          4          5
      1 Pt  0.000000
      2 Cl  2.438400  0.000000
      3 Cl  2.438400  3.448418  0.000000
      4 Cl  2.438400  3.448418  4.876800  0.000000
      5 Cl  2.438400  4.876800  3.448418  3.448418  0.000000
Stoichiometry      Cl4Pt(2-)
Framework group    D4H[O(Pt),2C2'(Cl.Cl)]
Deg. of freedom    1
Full point group   D4H
Largest Abelian subgroup      D2H      NOp      8
Largest concise Abelian subgroup D2      NOp      4
                        Standard orientation:
-----
-----
    
```

```

-----
-----
Center      Atomic      Atomic      Coordinates
(Angstroms)
Number      Number      Type      X      Y
Z
-----
-----
      1      78      0      0.000000      0.000000
0.000000
      2      17      0      0.000000      2.438400
0.000000
      3      17      0      2.438400      0.000000
0.000000
      4      17      0      -2.438400      0.000000
0.000000
      5      17      0      0.000000      -2.438400
0.000000
-----
-----
    
```

```

-----
-----
Rotational constants (GHZ):      1.2153348      1.2153348
0.6076674
-----
-----
    
```

```
Leave Link 202 at Fri Jan 17 09:22:41 2014, MaxMem= 104857600
cpu:          0.0
(Enter C:\G03W\l301.exe)
General basis read from cards: (5D, 7F)
Centers:     1
S 6 1.00
  Exponent= 1.6896015676D+06 Coefficients= 5.7974482200D-02
  Exponent= 7.5093403004D+05 Coefficients= -1.3148538600D-02
  Exponent= 3.3374845779D+05 Coefficients= 1.2503763310D-01
  Exponent= 1.4833264791D+05 Coefficients= 9.1535752600D-02
  Exponent= 6.5925621293D+04 Coefficients= 3.2913880880D-01
  Exponent= 2.9300276130D+04 Coefficients= 5.3748713720D-01
S 1 1.00
  Exponent= 1.3022344947D+04 Coefficients= 1.0000000000D+00
S 1 1.00
  Exponent= 5.7877088650D+03 Coefficients= 1.0000000000D+00
S 1 1.00
  Exponent= 2.5723150510D+03 Coefficients= 1.0000000000D+00
S 1 1.00
  Exponent= 1.1432511340D+03 Coefficients= 1.0000000000D+00
S 1 1.00
  Exponent= 5.0811161500D+02 Coefficients= 1.0000000000D+00
S 1 1.00
  Exponent= 2.2582738400D+02 Coefficients= 1.0000000000D+00
S 1 1.00
  Exponent= 1.0036772600D+02 Coefficients= 1.0000000000D+00
S 1 1.00
  Exponent= 4.4607878000D+01 Coefficients= 1.0000000000D+00
S 1 1.00
  Exponent= 1.9825724000D+01 Coefficients= 1.0000000000D+00
S 1 1.00
  Exponent= 8.8114330000D+00 Coefficients= 1.0000000000D+00
S 1 1.00
  Exponent= 3.9161920000D+00 Coefficients= 1.0000000000D+00
S 1 1.00
  Exponent= 1.7405300000D+00 Coefficients= 1.0000000000D+00
S 1 1.00
  Exponent= 7.7356900000D-01 Coefficients= 1.0000000000D+00
S 1 1.00
  Exponent= 3.4380800000D-01 Coefficients= 1.0000000000D+00
S 1 1.00
  Exponent= 1.5280400000D-01 Coefficients= 1.0000000000D+00
S 1 1.00
  Exponent= 6.7913000000D-02 Coefficients= 1.0000000000D+00
P 5 1.00
  Exponent= 2.3642643991D+04 Coefficients= 1.1403826400D-02
  Exponent= 9.4570575960D+03 Coefficients= 1.7083256700D-02
  Exponent= 3.7828230390D+03 Coefficients= 8.0886502700D-02
  Exponent= 1.5131292150D+03 Coefficients= 2.5252184340D-01
  Exponent= 6.0525168600D+02 Coefficients= 7.4017959180D-01
```



```
P 1 1.00
  Exponent= 2.4210067400D+02 Coefficients= 1.0000000000D+00
P 1 1.00
  Exponent= 9.6840270000D+01 Coefficients= 1.0000000000D+00
P 1 1.00
  Exponent= 3.8736108000D+01 Coefficients= 1.0000000000D+00
P 1 1.00
  Exponent= 1.5494443000D+01 Coefficients= 1.0000000000D+00
P 1 1.00
  Exponent= 6.1977770000D+00 Coefficients= 1.0000000000D+00
P 1 1.00
  Exponent= 2.4791110000D+00 Coefficients= 1.0000000000D+00
P 1 1.00
  Exponent= 9.9164400000D-01 Coefficients= 1.0000000000D+00
P 1 1.00
  Exponent= 3.9665800000D-01 Coefficients= 1.0000000000D+00
P 1 1.00
  Exponent= 1.5866300000D-01 Coefficients= 1.0000000000D+00
P 1 1.00
  Exponent= 6.3465000000D-02 Coefficients= 1.0000000000D+00
D 4 1.00
  Exponent= 1.8110792460D+03 Coefficients= 7.6859038000D-03
  Exponent= 6.5857427100D+02 Coefficients= 4.3883054800D-02
  Exponent= 2.3948155300D+02 Coefficients= 2.4558000620D-01
  Exponent= 8.7084201000D+01 Coefficients= 8.0580963240D-01
D 1 1.00
  Exponent= 3.1666982000D+01 Coefficients= 1.0000000000D+00
D 1 1.00
  Exponent= 1.1515266000D+01 Coefficients= 1.0000000000D+00
D 1 1.00
  Exponent= 4.1873700000D+00 Coefficients= 1.0000000000D+00
D 1 1.00
  Exponent= 1.5226800000D+00 Coefficients= 1.0000000000D+00
D 1 1.00
  Exponent= 5.5370200000D-01 Coefficients= 1.0000000000D+00
D 1 1.00
  Exponent= 2.0134600000D-01 Coefficients= 1.0000000000D+00
D 1 1.00
  Exponent= 7.3217000000D-02 Coefficients= 1.0000000000D+00
F 4 1.00
  Exponent= 8.5141859000D+01 Coefficients= 6.3002593000D-02
  Exponent= 2.8380620000D+01 Coefficients= 2.9424498280D-01
  Exponent= 9.4602070000D+00 Coefficients= 5.6544272570D-01
  Exponent= 3.1534020000D+00 Coefficients= 3.7760481600D-01
F 1 1.00
  Exponent= 1.0511340000D+00 Coefficients= 1.0000000000D+00
F 1 1.00
  Exponent= 3.5037800000D-01 Coefficients= 1.0000000000D+00
****
Centers: 2 3 4 5
```

```
6-31+G(d)
****
There are      55 symmetry adapted basis functions of AG
symmetry.
There are      18 symmetry adapted basis functions of B1G
symmetry.
There are      14 symmetry adapted basis functions of B2G
symmetry.
There are      14 symmetry adapted basis functions of B3G
symmetry.
There are       5 symmetry adapted basis functions of AU
symmetry.
There are      27 symmetry adapted basis functions of B1U
symmetry.
There are      33 symmetry adapted basis functions of B2U
symmetry.
There are      33 symmetry adapted basis functions of B3U
symmetry.
Integral buffers will be      262144 words long.
Raffenetti 2 integral format.
Two-electron integral symmetry is turned on.
  199 basis functions,   417 primitive gaussians,   220
cartesian basis functions
  74 alpha electrons      74 beta electrons
      nuclear repulsion energy      1391.1768971787 Hartrees.
IExCor=1009 DFT=T Ex=PBE+HF Corr=PBE ExCW=0 ScaHFX= 0.250000
ScaDFX= 0.750000 0.750000 1.000000 1.000000
IRadAn=      5 IRanWt=      -1 IRanGd=      0 ICorTp=0
NAtoms=      5 NActive=      5 NUniq=      2 SFac= 3.00D+00 NATFMM=
80 NAOKFM=F Big=F
```

```
-----
United Atom Topological Model (UA0 parameters set).
  Nord Group Hybr Charge Alpha Radius      Bonded to
  1 Pt      *    0.00  1.00  1.377 C12      [s] C13      [s] C14
[s] C15      [s]
  2 Cl      *    0.00  1.00  1.973 Pt1      [s]
  3 Cl      *    0.00  1.00  1.973 Pt1      [s]
  4 Cl      *    0.00  1.00  1.973 Pt1      [s]
  5 Cl      *    0.00  1.00  1.973 Pt1      [s]
-----
```

```
-----
Polarizable Continuum Model (PCM)
=====
Model          : PCM.
Atomic radii   : UA0 (Simple United Atom Topological
Model).
Polarization charges : Total charges.
Charge compensation : None.
Solution method : Matrix inversion.
```

```
Cavity          : GePol (RMin=0.200 OFac=0.890).
                  Default sphere list used, NSphG=    5.
                  Tesserae with average area of 0.200
Ang**2.
Solvent         : Water, Eps      = 78.390000
                  Eps(inf)=    1.776000
                  RSolv  =    1.385000 Ang.
-----
Using symmetry in molecular cavity generation.
GePol: Number of tesserae being generated      =    1720
GePol: Average area of tesserae                =         0.09
Ang**2
GePol: Minimum area of tessera                =    0.15D-02
Ang**2
GePol: Maximum area of tessera                =    0.19991
Ang**2
GePol: Number of small tesserae               =         0
GePol: Fraction of small tesserae (<1% of avg) =         0.00%
GePol: Total count of vertices                =    6464
GePol: Maximum number of vertices in a tessera =         8
GePol: Cavity surface area                    =    154.292
Ang**2
GePol: Cavity volume                          =    135.840
Ang**3
DisRep: Neglecting contributions from atom    1
Leave Link 301 at Fri Jan 17 09:22:42 2014, MaxMem= 104857600
cpu:      1.0
(Enter C:\G03W\l302.exe)
NPNDir=0 NMtPBC=    1 NCellOv=    1 NCell=    1 NClECP=    1
NCellD=    1
          NCellK=    1 NCellE2=    1 NClLst=    1 CellRange=
0.0.
One-electron integrals computed using PRISM.
One-electron integral symmetry used in STVInt
NBasis=  199 RedAO= T  NBF=   55   18   14   14   5   27
33   33
NBsUse=  199 1.00D-06 NBFU=   55   18   14   14   5   27
33   33
Precomputing XC quadrature grid using
IXGrd= 2 IRadAn=          5 IRanWt=          -1 IRanGd=
0.
Defaulting to unpruned grid for atomic number 78.
NRdTot=   407 NPtTot=   132060 NUsed=   133903 NTot=
133919
NSgBfM=  207  207  207  207.
Leave Link 302 at Fri Jan 17 09:22:43 2014, MaxMem= 104857600
cpu:      0.0
(Enter C:\G03W\l308.exe)
```

```
Leave Link 308 at Fri Jan 17 09:22:44 2014, MaxMem= 104857600
cpu: 0.0
(Enter C:\G03W\l303.exe)
DipDrv: MaxL=1.
Leave Link 303 at Fri Jan 17 09:22:44 2014, MaxMem= 104857600
cpu: 0.0
(Enter C:\G03W\l401.exe)
Harris functional with IExCor= 1009 diagonalized for initial
guess.
ExpMin= 4.83D-02 ExpMax= 1.69D+06 ExpMxC= 1.69D+06 IAcc=4
IRadAn= 199590 AccDes= 0.00D+00
HarFok: IExCor=1009 AccDes= 0.00D+00 IRadAn= 199590 IDoV=1
ScaDFX= 1.000000 1.000000 1.000000 1.000000
Harris En= -19167.4255278408
Initial guess orbital symmetries:
Occupied (A1G) (A1G) (EU) (EU) (A2U) (A1G) (B1G) (EU)
(EU)
(A1G) (A1G) (EU) (EU) (A2U) (B1G) (B2G) (EG) (EG)
(A1G) (A1G) (EU) (EU) (A2U) (B1G) (B2G) (EG) (EG)
(A1G) (A1G) (B1G) (EU) (EU) (B1G) (EU) (EU) (A1G)
(A2G) (EU) (EU) (B2G) (B2U) (EG) (EG) (A2U) (A1G) (EU)
(EU) (B2U) (B1U) (EU) (EU) (A2U) (EU) (EU) (A2U)
(A1G) (B1G) (EU) (EU) (A1G) (B1G) (B2G) (EU)
(EU) (EG) (EG) (A2U) (B2U) (EU) (EU) (A2G) (A1G)
(B2G) (EG) (EG)
Virtual (B1G) (A1G) (A2U) (EU) (EU) (B1G) (A1G) (B2G)
(EG) (EG) (A2U) (A1G) (EU) (EU) (EU) (EU) (B2U)
(A2G) (B1G) (A1G) (EG) (EG) (EU) (EU) (B2G)
(A2U) (EU) (EU) (A1G) (B1G) (B1G) (A1G) (B2G) (A2U)
(EU) (EU) (B2U) (EU) (EU) (EG) (EG) (B2U) (B1G)
(EU) (EU) (EG) (EG) (A2G) (EU) (EU) (A2U) (B2G)
(A1G) (B1U) (A1U) (EU) (EU) (EG) (EG) (A2G)
(A1G) (B1G) (A1G) (B1U) (EU) (EU) (EG) (EG) (B1G)
(A2U) (B2G) (EU) (EU) (B2U) (A1G) (EU) (EU) (B1G)
(A2U) (A1G) (EU) (EU) (B1U) (EU) (EU) (A2U) (B2U) (EU)
(EU) (EG) (EG) (A1G) (B2G) (B1G) (A1G) (A2U)
(EU) (EU) (EG) (EG) (B2G) (A1G) (B1G) (A1G) (A2U)
(EU) (EU) (EG) (EG) (B2G) (A1G) (B1G) (A1G) (A2U)
(EU) (EU) (EG) (EG) (B2G) (A1G) (B1G) (A1G) (A2U)
```

```
(EU) (A1G) (A2U) (EU) (EU) (A1G) (A1G) (A1G)
(A1G)
      (A1G)
The electronic state of the initial guess is 1-A1G.
Leave Link 401 at Fri Jan 17 09:22:46 2014, MaxMem= 104857600
cpu:      1.0
(Enter C:\G03W\1502.exe)
Closed shell SCF:
Requested convergence on RMS density matrix=1.00D-08 within1000
cycles.
Requested convergence on MAX density matrix=1.00D-06.
Requested convergence on          energy=1.00D-06.
No special actions if energy rises.
Using DIIS extrapolation, IDIIS= 1040.
Integral symmetry usage will be decided dynamically.
      133902 words used for storage of precomputed grid.
IEnd= 1299438 IEndB= 1299438 NGot= 104857600 MDV= 104608783
LenX= 104608783
Fock matrices will be formed incrementally for 20 cycles.

Cycle 1 Pass 1 IDiag 1:
Petite list used in FoFDir.
MinBra= 0 MaxBra= 3 Meth= 1.
IRaf=      0 NMat= 1 IRICut=      1 DoRegI=T DoRafI=F
ISym2E= 1 JSym2E=1.
Defaulting to unpruned grid for atomic number 78.
Defaulting to unpruned grid for atomic number 78.
E= -19152.4955574018
DIIS: error= 1.81D+00 at cycle 1 NSaved= 1.
NSaved= 1 IEnMin= 1 EnMin= -19152.4955574018 IErMin= 1
ErrMin= 1.81D+00
ErrMax= 1.81D+00 EMaxC= 1.00D-01 BMatC= 3.09D+02 BMatP= 3.09D+02
IDIUse=3 WtCom= 0.00D+00 WtEn= 1.00D+00
Coeff-Com: 0.100D+01
Coeff-En: 0.100D+01
Coeff: 0.100D+01
Gap= -0.454 Goal= None Shift= 0.000
GapD= -0.454 DampG=0.250 DampE=0.125 DampFc=0.1250 IDamp=-1.
Damping current iteration by 1.25D-01
RMSDP=1.34D-02 MaxDP=4.47D-01 OVMMax= 9.06D-01

Cycle 2 Pass 1 IDiag 1:
RMSU= 1.65D-03 CP: 1.01D+00
E= -19153.1337740957 Delta-E= -0.638216693878 Rises=F
Damp=T
DIIS: error= 1.57D+00 at cycle 2 NSaved= 2.
NSaved= 2 IEnMin= 2 EnMin= -19153.1337740957 IErMin= 2
ErrMin= 1.57D+00
ErrMax= 1.57D+00 EMaxC= 1.00D-01 BMatC= 2.25D+02 BMatP= 3.09D+02
IDIUse=3 WtCom= 0.00D+00 WtEn= 1.00D+00
```

Coeff-Com: -0.553D+01 0.653D+01  
Coeff-En: 0.000D+00 0.100D+01  
Coeff: 0.000D+00 0.100D+01  
Gap= 0.017 Goal= None Shift= 0.000  
RMSDP=8.61D-03 MaxDP=3.05D-01 DE=-6.38D-01 OVMax= 1.44D-01

Cycle 3 Pass 1 IDiag 1:  
RMSU= 6.10D-03 CP: 1.03D+00 3.00D+00  
E= -19153.3421198504 Delta-E= -0.208345754658 Rises=F  
Damp=F  
DIIS: error= 3.64D-01 at cycle 3 NSaved= 3.  
NSaved= 3 IEnMin= 3 EnMin= -19153.3421198504 IErMin= 3  
ErrMin= 3.64D-01  
ErrMax= 3.64D-01 EMaxC= 1.00D-01 BMatC= 1.46D+01 BMatP= 2.25D+02  
IDIUse=3 WtCom= 0.00D+00 WtEn= 1.00D+00  
EnCoef did 100 forward-backward iterations  
Coeff-Com: 0.657D+01-0.740D+01 0.183D+01  
Coeff-En: 0.398D+00 0.220D-01 0.580D+00  
Coeff: 0.398D+00 0.220D-01 0.580D+00  
Gap= -0.253 Goal= None Shift= 0.000  
RMSDP=8.50D-03 MaxDP=2.59D-01 DE=-2.08D-01 OVMax= 9.62D-01

Cycle 4 Pass 1 IDiag 1:  
RMSU= 3.80D-03 CP: 1.00D+00 1.32D+00 1.39D-01  
E= -19154.7896737787 Delta-E= -1.447553928396 Rises=F  
Damp=F  
DIIS: error= 9.78D-02 at cycle 4 NSaved= 4.  
NSaved= 4 IEnMin= 4 EnMin= -19154.7896737787 IErMin= 4  
ErrMin= 9.78D-02  
ErrMax= 9.78D-02 EMaxC= 1.00D-01 BMatC= 1.16D+00 BMatP= 1.46D+01  
IDIUse=3 WtCom= 2.21D-02 WtEn= 9.78D-01  
Coeff-Com: -0.151D+01 0.177D+01-0.854D-01 0.826D+00  
Coeff-En: 0.000D+00 0.000D+00 0.282D+00 0.718D+00  
Coeff: -0.334D-01 0.392D-01 0.274D+00 0.720D+00  
Gap= 0.109 Goal= None Shift= 0.000  
RMSDP=5.59D-03 MaxDP=1.33D-01 DE=-1.45D+00 OVMax= 5.03D-01

Cycle 5 Pass 1 IDiag 1:  
RMSU= 2.43D-03 CP: 1.01D+00 2.89D+00 4.42D-01 -1.78D-02  
E= -19155.2408762008 Delta-E= -0.451202422009 Rises=F  
Damp=F  
DIIS: error= 5.35D-02 at cycle 5 NSaved= 5.  
NSaved= 5 IEnMin= 5 EnMin= -19155.2408762008 IErMin= 5  
ErrMin= 5.35D-02  
ErrMax= 5.35D-02 EMaxC= 1.00D-01 BMatC= 3.28D-01 BMatP= 1.16D+00  
IDIUse=3 WtCom= 4.65D-01 WtEn= 5.35D-01  
Coeff-Com: -0.611D+00 0.705D+00-0.776D-01 0.395D+00 0.588D+00  
Coeff-En: 0.000D+00 0.000D+00 0.000D+00 0.306D+00 0.694D+00  
Coeff: -0.284D+00 0.328D+00-0.361D-01 0.347D+00 0.645D+00  
Gap= 0.154 Goal= None Shift= 0.000

RMSDP=2.60D-03 MaxDP=8.32D-02 DE=-4.51D-01 OVMax= 2.96D-01

Cycle 6 Pass 1 IDiag 1:  
RMSU= 1.08D-03 CP: 1.01D+00 2.19D+00 3.17D-01 4.18D-01  
6.13D-01  
E= -19155.4646562030 Delta-E= -0.223780002274 Rises=F  
Damp=F  
DIIS: error= 1.02D-02 at cycle 6 NSaved= 6.  
NSaved= 6 IEnMin= 6 EnMin= -19155.4646562030 IErMin= 6  
ErrMin= 1.02D-02  
ErrMax= 1.02D-02 EMaxC= 1.00D-01 BMatC= 1.20D-02 BMatP= 3.28D-01  
IDIUse=3 WtCom= 8.98D-01 WtEn= 1.02D-01  
Coeff-Com: -0.909D-01 0.104D+00-0.117D-01 0.225D-01 0.171D+00  
0.805D+00  
Coeff-En: 0.000D+00 0.000D+00 0.000D+00 0.000D+00 0.000D+00  
0.100D+01  
Coeff: -0.816D-01 0.931D-01-0.105D-01 0.202D-01 0.154D+00  
0.825D+00  
Gap= 0.148 Goal= None Shift= 0.000  
RMSDP=6.16D-04 MaxDP=1.73D-02 DE=-2.24D-01 OVMax= 5.58D-02

Cycle 7 Pass 1 IDiag 1:  
RMSU= 1.99D-04 CP: 1.01D+00 2.36D+00 3.49D-01 3.21D-01  
7.27D-01  
CP: 8.89D-01  
E= -19155.4737885748 Delta-E= -0.009132371782 Rises=F  
Damp=F  
DIIS: error= 3.63D-03 at cycle 7 NSaved= 7.  
NSaved= 7 IEnMin= 7 EnMin= -19155.4737885748 IErMin= 7  
ErrMin= 3.63D-03  
ErrMax= 3.63D-03 EMaxC= 1.00D-01 BMatC= 1.30D-03 BMatP= 1.20D-02  
IDIUse=3 WtCom= 9.64D-01 WtEn= 3.63D-02  
Coeff-Com: 0.107D-01-0.124D-01-0.134D-02-0.334D-02-0.925D-02  
0.193D+00  
Coeff-Com: 0.822D+00  
Coeff-En: 0.000D+00 0.000D+00 0.000D+00 0.000D+00 0.000D+00  
0.977D-01  
Coeff-En: 0.902D+00  
Coeff: 0.103D-01-0.119D-01-0.129D-02-0.321D-02-0.892D-02  
0.190D+00  
Coeff: 0.825D+00  
Gap= 0.147 Goal= None Shift= 0.000  
RMSDP=1.75D-04 MaxDP=5.59D-03 DE=-9.13D-03 OVMax= 1.81D-02

Cycle 8 Pass 1 IDiag 1:  
RMSU= 6.74D-05 CP: 1.01D+00 2.31D+00 3.39D-01 3.42D-01  
7.00D-01  
CP: 9.47D-01 8.31D-01  
E= -19155.4748215935 Delta-E= -0.001033018674 Rises=F  
Damp=F

DIIS: error= 2.72D-04 at cycle 8 NSaved= 8.  
NSaved= 8 IEnMin= 8 EnMin= -19155.4748215935 IErMin= 8  
ErrMin= 2.72D-04  
ErrMax= 2.72D-04 EMaxC= 1.00D-01 BMatC= 1.46D-05 BMatP= 1.30D-03  
IDIUse=3 WtCom= 9.97D-01 WtEn= 2.72D-03  
Coeff-Com: 0.498D-02-0.572D-02-0.616D-04-0.145D-02-0.994D-02  
0.104D-01  
Coeff-Com: 0.252D+00 0.750D+00  
Coeff-En: 0.000D+00 0.000D+00 0.000D+00 0.000D+00 0.000D+00  
0.000D+00  
Coeff-En: 0.000D+00 0.100D+01  
Coeff: 0.497D-02-0.570D-02-0.614D-04-0.145D-02-0.991D-02  
0.104D-01  
Coeff: 0.252D+00 0.750D+00  
Gap= 0.148 Goal= None Shift= 0.000  
RMSDP=2.83D-05 MaxDP=9.59D-04 DE=-1.03D-03 OVMax= 9.43D-04

Cycle 9 Pass 1 IDiag 1:  
RMSU= 1.49D-05 CP: 1.01D+00 2.31D+00 3.40D-01 3.42D-01  
7.02D-01  
CP: 9.45D-01 9.29D-01 9.39D-01  
E= -19155.4748375750 Delta-E= -0.000015981561 Rises=F  
Damp=F

DIIS: error= 4.49D-05 at cycle 9 NSaved= 9.  
NSaved= 9 IEnMin= 9 EnMin= -19155.4748375750 IErMin= 9  
ErrMin= 4.49D-05  
ErrMax= 4.49D-05 EMaxC= 1.00D-01 BMatC= 3.49D-07 BMatP= 1.46D-05  
IDIUse=1 WtCom= 1.00D+00 WtEn= 0.00D+00  
Coeff-Com: 0.736D-03-0.840D-03 0.934D-05-0.264D-03-0.234D-02-  
0.624D-02  
Coeff-Com: 0.315D-01 0.197D+00 0.780D+00  
Coeff: 0.736D-03-0.840D-03 0.934D-05-0.264D-03-0.234D-02-  
0.624D-02  
Coeff: 0.315D-01 0.197D+00 0.780D+00  
Gap= 0.147 Goal= None Shift= 0.000  
RMSDP=5.94D-06 MaxDP=1.47D-04 DE=-1.60D-05 OVMax= 4.66D-04

Cycle 10 Pass 1 IDiag 1:  
RMSU= 3.18D-06 CP: 1.01D+00 2.31D+00 3.40D-01 3.42D-01  
7.02D-01  
CP: 9.45D-01 9.35D-01 9.98D-01 8.56D-01  
E= -19155.4748381483 Delta-E= -0.000000573284 Rises=F  
Damp=F

DIIS: error= 1.43D-05 at cycle 10 NSaved= 10.  
NSaved=10 IEnMin=10 EnMin= -19155.4748381483 IErMin=10  
ErrMin= 1.43D-05  
ErrMax= 1.43D-05 EMaxC= 1.00D-01 BMatC= 2.57D-08 BMatP= 3.49D-07  
IDIUse=1 WtCom= 1.00D+00 WtEn= 0.00D+00  
Coeff-Com: -0.263D-03 0.301D-03 0.177D-04 0.700D-05 0.465D-03-  
0.198D-02



Coeff-Com: -0.192D-01-0.432D-01 0.155D+00 0.909D+00  
Coeff: -0.263D-03 0.301D-03 0.177D-04 0.700D-05 0.465D-03-  
0.198D-02  
Coeff: -0.192D-01-0.432D-01 0.155D+00 0.909D+00  
Gap= 0.147 Goal= None Shift= 0.000  
RMSDP=2.14D-06 MaxDP=6.40D-05 DE=-5.73D-07 OVMax= 1.49D-04

Cycle 11 Pass 1 IDiag 1:  
RMSU= 4.80D-07 CP: 1.01D+00 2.31D+00 3.40D-01 3.42D-01  
7.02D-01  
CP: 9.46D-01 9.38D-01 1.01D+00 9.52D-01  
1.06D+00  
E= -19155.4748381955 Delta-E= -0.000000047119 Rises=F  
Damp=F

DIIS: error= 1.51D-06 at cycle 11 NSaved= 11.  
NSaved=11 IEnMin=11 EnMin= -19155.4748381955 IErMin=11  
ErrMin= 1.51D-06  
ErrMax= 1.51D-06 EMaxC= 1.00D-01 BMatC= 2.89D-10 BMatP= 2.57D-08  
IDIUse=1 WtCom= 1.00D+00 WtEn= 0.00D+00  
Coeff-Com: -0.141D-04 0.162D-04-0.675D-06 0.816D-05 0.210D-04-  
0.816D-04  
Coeff-Com: -0.712D-03-0.629D-02-0.143D-01-0.208D-02 0.102D+01  
Coeff: -0.141D-04 0.162D-04-0.675D-06 0.816D-05 0.210D-04-  
0.816D-04  
Coeff: -0.712D-03-0.629D-02-0.143D-01-0.208D-02 0.102D+01  
Gap= 0.147 Goal= None Shift= 0.000  
RMSDP=2.50D-07 MaxDP=9.40D-06 DE=-4.71D-08 OVMax= 2.06D-05

Cycle 12 Pass 1 IDiag 1:  
RMSU= 9.01D-08 CP: 1.01D+00 2.31D+00 3.40D-01 3.42D-01  
7.02D-01  
CP: 9.46D-01 9.39D-01 1.01D+00 9.58D-01  
1.09D+00  
CP: 1.13D+00  
E= -19155.4748381961 Delta-E= -0.000000000680 Rises=F  
Damp=F

DIIS: error= 1.38D-07 at cycle 12 NSaved= 12.  
NSaved=12 IEnMin=12 EnMin= -19155.4748381961 IErMin=12  
ErrMin= 1.38D-07  
ErrMax= 1.38D-07 EMaxC= 1.00D-01 BMatC= 2.96D-12 BMatP= 2.89D-10  
IDIUse=1 WtCom= 1.00D+00 WtEn= 0.00D+00  
Coeff-Com: 0.208D-05-0.239D-05-0.401D-06 0.106D-05-0.347D-05  
0.143D-04  
Coeff-Com: 0.220D-03 0.858D-03-0.594D-03-0.788D-02 0.756D-02  
0.100D+01  
Coeff: 0.208D-05-0.239D-05-0.401D-06 0.106D-05-0.347D-05  
0.143D-04  
Coeff: 0.220D-03 0.858D-03-0.594D-03-0.788D-02 0.756D-02  
0.100D+01  
Gap= 0.147 Goal= None Shift= 0.000

```
RMSDP=2.40D-08 MaxDP=8.45D-07 DE=-6.80D-10 OVMax= 1.48D-06

Cycle 13 Pass 1 IDiag 1:
RMSU= 7.57D-09 CP: 1.01D+00 2.31D+00 3.40D-01 3.42D-01
7.02D-01
CP: 9.46D-01 9.39D-01 1.01D+00 9.58D-01
1.09D+00
CP: 1.14D+00 1.15D+00
E= -19155.4748381964 Delta-E= -0.000000000317 Rises=F
Damp=F
DIIS: error= 7.46D-08 at cycle 13 NSaved= 13.
NSaved=13 IEnMin=13 EnMin= -19155.4748381964 IErMin=13
ErrMin= 7.46D-08
ErrMax= 7.46D-08 EMaxC= 1.00D-01 BMatC= 5.99D-13 BMatP= 2.96D-12
IDIUse=1 WtCom= 1.00D+00 WtEn= 0.00D+00
Coeff-Com: 0.318D-06-0.365D-06-0.120D-07 0.105D-07-0.390D-06
0.313D-05
Coeff-Com: -0.100D-05 0.215D-04-0.593D-04 0.777D-04-0.126D-01-
0.406D-01
Coeff-Com: 0.105D+01
Coeff: 0.318D-06-0.365D-06-0.120D-07 0.105D-07-0.390D-06
0.313D-05
Coeff: -0.100D-05 0.215D-04-0.593D-04 0.777D-04-0.126D-01-
0.406D-01
Coeff: 0.105D+01
Gap= 0.147 Goal= None Shift= 0.000
RMSDP=4.85D-09 MaxDP=1.94D-07 DE=-3.17D-10 OVMax= 2.67D-07

Error on total polarization charges = 0.07401
SCF Done: E(RPBE+HF-PBE) = -19155.4748382 A.U. after 13
cycles
Convg = 0.4847D-08 -V/T = 2.0014
S**2 = 0.0000
KE= 1.912955091943D+04 PE=-4.842245318434D+04 EE=
8.746250529529D+03
-----
----
Variational PCM results
=====
<psi(f)| H |psi(f)> (a.u.) = -
19155.178895
<psi(f)|H+V(f)/2|psi(f)> (a.u.) = -
19155.474838
Total free energy in solution:
with all non electrostatic terms (a.u.) = -
19155.462012
-----
----
(Polarized solute)-Solvent (kcal/mol) = -185.71
```

```
-----  
----  
Cavitation energy          (kcal/mol) =      19.64  
Dispersion energy         (kcal/mol) =     -13.23  
Repulsion energy          (kcal/mol) =       1.64  
Total non electrostatic   (kcal/mol) =       8.05  
-----
```

```
----  
Partition over spheres:  
Sphere on Atom Surface Charge  GE1    GCav    GDR  
  1   Pt1      0.96 -0.043   2.83    0.83   -0.11  
  2   Cl2     29.05  0.398  -37.37   4.70   -2.87  
  3   Cl3     29.05  0.398  -37.37   4.70   -2.87  
  4   Cl4     29.05  0.398  -37.38   4.70   -2.87  
  5   Cl5     29.05  0.398  -37.38   4.70   -2.87  
Added spheres:      37.15  0.353  -39.04   0.00   0.00  
-----
```

```
----  
After PCM corrections, the SCF energy is -19155.4748382  
a.u.  
-----
```

```
----  
Leave Link 502 at Fri Jan 17 09:25:37 2014, MaxMem= 104857600  
cpu: 171.0
```

(Enter C:\G03W\l801.exe)

```
Range of M.O.s used for correlation:      1   199  
NBasis= 199 NAE= 74 NBE= 74 NFC= 0 NFV= 0  
NRorb= 199 NOA= 74 NOB= 74 NVA= 125 NVB= 125
```

\*\*\*\* Warning!!: The largest alpha MO coefficient is  
0.12899776D+02

```
Leave Link 801 at Fri Jan 17 09:25:38 2014, MaxMem= 104857600  
cpu: 0.0
```

(Enter C:\G03W\l1002.exe)

```
Minotr: Closed-shell wavefunction.  
        Direct CPHF calculation.  
        Solving linear equations simultaneously.  
        Differentiating once with respect to magnetic field  
using GIAOs.  
        Electric field/nuclear overlap derivatives assumed to  
be zero.  
        Using symmetry in CPHF.  
        Requested convergence is 1.0D-08 RMS, and 1.0D-07  
maximum.  
        Secondary convergence is 1.0D-12 RMS, and 1.0D-12  
maximum.  
        NewPWx=T KeepS1=F KeepF1=F KeepIn=T MapXYZ=F.  
        MDV= 104857568 using IRadAn= 1.  
        Defaulting to unpruned grid for atomic number 78.
```

```
Generate precomputed XC quadrature information.
Symmetry not used in FoFDir.
MinBra= 0 MaxBra= 3 Meth= 1.
IRaf=      0 NMat=  1 IRICut=      1 DoRegI=T DoRafI=F
ISym2E= 0 JSym2E=0.
Defaulting to unpruned grid for atomic number 78.
Defaulting to unpruned grid for atomic number 78.
      There are 3 degrees of freedom in the 1st order CPHF.
      3 vectors were produced by pass 0.
AX will form 3 AO Fock derivatives at one time.
      3 vectors were produced by pass 1.
      3 vectors were produced by pass 2.
      3 vectors were produced by pass 3.
      3 vectors were produced by pass 4.
      3 vectors were produced by pass 5.
      3 vectors were produced by pass 6.
Inv2: IOpt= 1 Iter= 1 AM= 3.84D-16 Conv= 1.00D-12.
Inverted reduced A of dimension 21 with in-core refinement.
Calculating GIAO nuclear magnetic shielding tensors.
SCF GIAO Magnetic shielding tensor (ppm):
 1 Pt  Isotropic = -3294.4355  Anisotropy = 7190.6898
    XX= 1499.3577  YX=  0.0001  ZX=  0.0000
    XY=  0.0001  YY= 1499.3577  ZY=  0.0000
    XZ= -0.0002  YZ= -0.0002  ZZ=-12882.0218
    Eigenvalues:-12882.0218 1499.3576 1499.3576
 2 Cl  Isotropic = 1247.9666  Anisotropy = 279.5088
    XX= 1182.5464  YX=  0.0000  ZX= -0.0003
    XY= -0.0001  YY= 1127.0477  ZY=  0.0001
    XZ= -0.0003  YZ= -0.0003  ZZ= 1434.3058
    Eigenvalues: 1127.0477 1182.5464 1434.3058
 3 Cl  Isotropic = 1247.9666  Anisotropy = 279.5088
    XX= 1127.0477  YX= -0.0001  ZX=  0.0001
    XY=  0.0000  YY= 1182.5464  ZY= -0.0003
    XZ= -0.0003  YZ= -0.0003  ZZ= 1434.3058
    Eigenvalues: 1127.0477 1182.5464 1434.3058
 4 Cl  Isotropic = 1247.9664  Anisotropy = 279.5092
    XX= 1127.0479  YX=  0.0000  ZX=  0.0000
    XY=  0.0000  YY= 1182.5454  ZY=  0.0000
    XZ= -0.0002  YZ=  0.0000  ZZ= 1434.3058
    Eigenvalues: 1127.0479 1182.5454 1434.3058
 5 Cl  Isotropic = 1247.9664  Anisotropy = 279.5092
    XX= 1182.5454  YX=  0.0000  ZX=  0.0000
    XY=  0.0000  YY= 1127.0479  ZY=  0.0000
    XZ=  0.0000  YZ= -0.0002  ZZ= 1434.3058
    Eigenvalues: 1127.0479 1182.5454 1434.3058
End of Minotr Frequency-dependent properties file 721 does not
exist.
Leave Link 1002 at Fri Jan 17 09:29:33 2014, MaxMem= 104857600
cpu: 235.0
(Enter C:\G03W\l601.exe)
```

Copying SCF densities to generalized density rwf, ISCF=0  
IROHF=0.

\*\*\*\*\*  
\*\*\*\*\*

Population analysis using the SCF density.

\*\*\*\*\*  
\*\*\*\*\*

Orbital symmetries:

|       |          |                                                  |
|-------|----------|--------------------------------------------------|
|       | Occupied | (A1G) (A1G) (EU) (EU) (A2U) (A1G) (A1G) (B1G)    |
|       |          | (EU) (EU) (EU) (EU) (A2U) (B1G) (B2G) (EG) (EG)  |
|       |          | (A1G) (A1G) (EU) (EU) (A2U) (B1G) (B2G) (EG)     |
| (EG)  |          | (A1G) (A1G) (B1G) (EU) (EU) (B1G) (EU) (EU)      |
| (A1G) |          | (B2U) (EG) (EG) (A2U) (A2G) (EU) (EU) (B2G) (EU) |
|       |          | (EU) (B2U) (B1U) (EU) (EU) (A2U) (A1G) (EU) (EU) |
|       |          | (A2U) (A1G) (B1G) (EU) (EU) (B1G) (A1G) (B2G)    |
|       |          | (EG) (EG) (EU) (EU) (A2U) (B2U) (EU) (EU) (A2G)  |
|       |          | (B2G) (EG) (EG) (A1G)                            |
|       | Virtual  | (B1G) (A1G) (EU) (EU) (A2U) (B1G) (B2G) (EG)     |
| (EG)  |          | (A1G) (A2U) (EU) (EU) (A1G) (B2U) (EU) (EU)      |
| (A2G) |          | (B1G) (EG) (EG) (A1G) (EU) (EU) (B2G) (A2U) (EU) |
|       |          | (EU) (A1G) (B1G) (B1G) (A1G) (B2G) (A2U) (EU)    |
|       |          | (EU) (EU) (EU) (EG) (EG) (B2U) (EU) (EU) (B1G)   |
|       |          | (EG) (EG) (B2U) (B2G) (A2G) (EU) (EU) (A2U)      |
| (A1G) |          | (B1U) (A1G) (A1U) (EU) (EU) (EG) (EG) (A2G)      |
| (B1G) |          | (A1G) (B1U) (EU) (EU) (EG) (EG) (B1G) (A2U) (EU) |
|       |          | (EU) (B2G) (B2U) (A1G) (EU) (EU) (B1G) (A2U)     |
| (A1G) |          | (EU) (EU) (B1U) (EU) (EU) (A2U) (B2U) (EU) (EU)  |
|       |          | (EG) (EG) (B2G) (A1G) (B1G) (A1G) (A2U) (EU)     |
| (EU)  |          | (EG) (EG) (B2G) (A1G) (B1G) (A1G) (A2U) (EU)     |
| (EU)  |          | (EG) (EG) (B2G) (A1G) (B1G) (A1G) (A2U) (EU)     |
| (EU)  |          | (A1G) (A2U) (EU) (EU) (A1G) (A1G) (A1G) (A1G)    |
|       |          | (A1G)                                            |

The electronic state is 1-A1G.

```
Alpha occ. eigenvalues -- *****-437.47350-419.60446-  
419.60446-419.60024  
Alpha occ. eigenvalues -- -102.75330-101.64787-101.64786-  
101.64784-101.64784  
Alpha occ. eigenvalues -- -94.36327 -94.36327 -94.35457 -  
79.56625 -79.56566  
Alpha occ. eigenvalues -- -79.56086 -79.56086 -79.55930 -  
21.82478 -18.24232  
Alpha occ. eigenvalues -- -18.24232 -18.22299 -11.88985 -  
11.88499 -11.87410  
Alpha occ. eigenvalues -- -11.87410 -11.87067 -9.47362 -  
9.47361 -9.47356  
Alpha occ. eigenvalues -- -9.47356 -7.20592 -7.20592 -  
7.20592 -7.20588  
Alpha occ. eigenvalues -- -7.20154 -7.20153 -7.20153 -  
7.20152 -7.20118  
Alpha occ. eigenvalues -- -7.20116 -7.20116 -7.20116 -  
3.32218 -3.32218  
Alpha occ. eigenvalues -- -3.31199 -3.30623 -3.30267 -  
3.30267 -3.30110  
Alpha occ. eigenvalues -- -3.10517 -1.98927 -1.98927 -  
1.95102 -0.77846  
Alpha occ. eigenvalues -- -0.76723 -0.76675 -0.76675 -  
0.38217 -0.37283  
Alpha occ. eigenvalues -- -0.36632 -0.32915 -0.32915 -  
0.32013 -0.32013  
Alpha occ. eigenvalues -- -0.30688 -0.28842 -0.28360 -  
0.28360 -0.26772  
Alpha occ. eigenvalues -- -0.25543 -0.24529 -0.24529 -  
0.24086  
Alpha virt. eigenvalues -- -0.09346 0.01887 0.05260  
0.05260 0.06074  
Alpha virt. eigenvalues -- 0.08187 0.09074 0.09640  
0.09640 0.10127  
Alpha virt. eigenvalues -- 0.10543 0.11488 0.11488  
0.13253 0.13378  
Alpha virt. eigenvalues -- 0.13392 0.13392 0.16168  
0.18241 0.23766  
Alpha virt. eigenvalues -- 0.23766 0.24492 0.27021  
0.27021 0.28017  
Alpha virt. eigenvalues -- 0.40824 0.42348 0.42348  
0.43081 0.43181  
Alpha virt. eigenvalues -- 0.55482 0.58887 0.63608  
0.64063 0.64178  
Alpha virt. eigenvalues -- 0.64178 0.66532 0.66532  
0.67510 0.67510  
Alpha virt. eigenvalues -- 0.68199 0.74534 0.74534  
0.74553 0.75025  
Alpha virt. eigenvalues -- 0.75025 0.75545 0.76654  
0.77501 0.79877
```

```
Alpha virt. eigenvalues --      0.79877   0.81616   0.82606
0.86827   0.90285
Alpha virt. eigenvalues --      0.93331   0.94145   0.94145
0.94527   0.94527
Alpha virt. eigenvalues --      0.94613   0.96521   1.00345
1.00658   1.00939
Alpha virt. eigenvalues --      1.00939   1.08144   1.08144
1.11700   1.16527
Alpha virt. eigenvalues --      1.18395   1.18395   1.18885
1.19583   1.39277
Alpha virt. eigenvalues --      1.45935   1.45935   1.57471
1.69118   1.73289
Alpha virt. eigenvalues --      1.90756   1.90756   2.75708
2.81343   2.81343
Alpha virt. eigenvalues --      2.83094   2.83306   3.07825
3.07825   3.12927
Alpha virt. eigenvalues --      3.12927   3.13920   3.15781
3.39397   5.59232
Alpha virt. eigenvalues --      7.11194   7.25810   7.25810
14.67361  14.67361
Alpha virt. eigenvalues --     14.67567  14.69632  14.83089
22.53352  39.90847
Alpha virt. eigenvalues --     40.03051  40.03051  90.07503
90.07503  90.07723
Alpha virt. eigenvalues --     90.08767  90.16020 104.70853
234.47383 234.56329
Alpha virt. eigenvalues --    234.56329
455.885401328.617951328.687801328.68780
Alpha virt. eigenvalues --
1661.825775146.30464*****
```

Condensed to atoms (all electrons):

|   |    | 1         | 2         | 3         | 4         | 5         |
|---|----|-----------|-----------|-----------|-----------|-----------|
| 1 | Pt | 77.201606 | 0.081350  | 0.081350  | 0.081350  | 0.081350  |
| 2 | Cl | 0.081350  | 17.587219 | -0.021347 | -0.021347 | -0.007626 |
| 3 | Cl | 0.081350  | -0.021347 | 17.587219 | -0.007626 | -0.021347 |
| 4 | Cl | 0.081350  | -0.021347 | -0.007626 | 17.587219 | -0.021347 |
| 5 | Cl | 0.081350  | -0.007626 | -0.021347 | -0.021347 | 17.587219 |

Mulliken atomic charges:

|   |    | 1         |
|---|----|-----------|
| 1 | Pt | 0.472995  |
| 2 | Cl | -0.618249 |
| 3 | Cl | -0.618249 |
| 4 | Cl | -0.618249 |
| 5 | Cl | -0.618249 |

Sum of Mulliken charges= -2.00000

Atomic charges with hydrogens summed into heavy atoms:

|   |    | 1         |
|---|----|-----------|
| 1 | Pt | 0.472995  |
| 2 | Cl | -0.618249 |
| 3 | Cl | -0.618249 |

```
4 Cl -0.618249
5 Cl -0.618249
Sum of Mulliken charges= -2.00000
Electronic spatial extent (au): <R**2>= 1686.5699
Charge= -2.0000 electrons
Dipole moment (field-independent basis, Debye):
X= 0.0000 Y= 0.0000 Z= 0.0000 Tot=
0.0000
Quadrupole moment (field-independent basis, Debye-Ang):
XX= -119.9608 YY= -119.9608 ZZ= -86.5697
XY= 0.0000 XZ= 0.0000 YZ= 0.0000
Traceless Quadrupole moment (field-independent basis, Debye-
Ang):
XX= -11.1304 YY= -11.1304 ZZ= 22.2608
XY= 0.0000 XZ= 0.0000 YZ= 0.0000
Octapole moment (field-independent basis, Debye-Ang**2):
XXX= 0.0000 YYY= 0.0000 ZZZ= 0.0000 XXY=
0.0000
XXY= 0.0000 XXZ= 0.0000 XZZ= 0.0000 YZZ=
0.0000
YYZ= 0.0000 XYZ= 0.0000
Hexadecapole moment (field-independent basis, Debye-Ang**3):
XXXX= -1341.0040 YYYY= -1341.0040 ZZZZ= -110.7755 XXXY=
0.0000
XXXZ= 0.0000 YYYYX= 0.0000 YYYZ= 0.0000 ZZZX=
0.0000
ZZZY= 0.0000 XXYY= -395.5491 XXZZ= -216.1846 YYZZ= -
216.1846
XXYZ= 0.0000 YYXZ= 0.0000 ZZXY= 0.0000
N-N= 1.391176897179D+03 E-N=-4.842245314061D+04 KE=
1.912955091943D+04
Symmetry AG KE= 9.805135748241D+03
Symmetry B1G KE= 6.698604994282D+02
Symmetry B2G KE= 6.241812730076D+02
Symmetry B3G KE= 6.241812730076D+02
Symmetry AU KE= 9.566891969803D+01
Symmetry B1U KE= 2.220637150669D+03
Symmetry B2U KE= 2.544943027691D+03
Symmetry B3U KE= 2.544943027691D+03
Calculating spin-rotation constants.
Leave Link 601 at Fri Jan 17 09:29:35 2014, MaxMem= 104857600
cpu: 2.0
(Enter C:\G03W\19999.exe)
1|1|UNPC-UNK|SP|RPBE1PBE|Gen|Cl4Pt1(2-)|PCUSER|17-Jan-2014|0||#p
PBE1P
BE/gen nmr=giao integral(ultrafine) SCRF(solvent=water)
SCF(NoVarAcc,m
axcycles=1000)||PtCl4_2-PBE0_SARCZORANMR||-
2,1|Pt,0,0.,0.,0.|Cl,0,0.,2
```



```
.4384,0.|Cl,0,2.4384,0.,0.|Cl,0,-2.4384,0.,0.|Cl,0,0.,-  
2.4384,0.||Vers  
ion=IA32W-G03RevE.01|State=1-A1G|HF=-19155.4748382|RMSD=4.847e-  
009|The  
rmal=0.|Dipole=0.,0.,0.|PG=D04H [O(Pt1),2C2'(C11.C11)]||@
```

```
JUST WHEN YOU THINK YOU'VE GOT THE WORLD ON A STRING,  
YOU FIND OUT IT'S YOUR LEASH.  
Job cpu time: 0 days 0 hours 6 minutes 56.0 seconds.  
File lengths (MBytes): RWF= 108 Int= 0 D2E= 0 Chk=  
9 Scr= 1  
Normal termination of Gaussian 03 at Fri Jan 17 09:29:36 2014.
```

### Output file for NMR calculation of $[\text{PtCl}_6]^{2-}$

Entering Link 1 = C:\G09W\l1.exe PID= 344.

Copyright (c) 1988,1990,1992,1993,1995,1998,2003,2009,2010,  
Gaussian, Inc. All Rights Reserved.

This is part of the Gaussian(R) 09 program. It is based on  
the Gaussian(R) 03 system (copyright 2003, Gaussian, Inc.),  
the Gaussian(R) 98 system (copyright 1998, Gaussian, Inc.),  
the Gaussian(R) 94 system (copyright 1995, Gaussian, Inc.),  
the Gaussian 92(TM) system (copyright 1992, Gaussian, Inc.),  
the Gaussian 90(TM) system (copyright 1990, Gaussian, Inc.),  
the Gaussian 88(TM) system (copyright 1988, Gaussian, Inc.),  
the Gaussian 86(TM) system (copyright 1986, Carnegie Mellon  
University), and the Gaussian 82(TM) system (copyright 1983,  
Carnegie Mellon University). Gaussian is a federally registered  
trademark of Gaussian, Inc.

This software contains proprietary and confidential information,  
including trade secrets, belonging to Gaussian, Inc.

This software is provided under written license and may be  
used, copied, transmitted, or stored only in accord with that  
written license.

The following legend is applicable only to US Government  
contracts under FAR:

#### RESTRICTED RIGHTS LEGEND

Use, reproduction and disclosure by the US Government is  
subject to restrictions as set forth in subparagraphs (a)

and (c) of the Commercial Computer Software - Restricted Rights clause in FAR 52.227-19.

Gaussian, Inc.  
340 Quinnipiac St., Bldg. 40, Wallingford CT 06492

-----  
Warning -- This program may not be used in any manner that competes with the business of Gaussian, Inc. or will provide assistance to any competitor of Gaussian, Inc. The licensee of this program is prohibited from giving any competitor of Gaussian, Inc. access to this program. By using this program, the user acknowledges that Gaussian, Inc. is engaged in the business of creating and licensing software in the field of computational chemistry and represents and warrants to the licensee that it is not a competitor of Gaussian, Inc. and that it will not use this program in any manner prohibited above.  
-----

Cite this work as:

Gaussian 09, Revision B.01,  
M. J. Frisch, G. W. Trucks, H. B. Schlegel, G. E. Scuseria,  
M. A. Robb, J. R. Cheeseman, G. Scalmani, V. Barone, B.  
Mennucci,  
G. A. Petersson, H. Nakatsuji, M. Caricato, X. Li, H. P.  
Hratchian,  
A. F. Izmaylov, J. Bloino, G. Zheng, J. L. Sonnenberg, M. Hada,  
M. Ehara, K. Toyota, R. Fukuda, J. Hasegawa, M. Ishida, T.  
Nakajima,  
Y. Honda, O. Kitao, H. Nakai, T. Vreven, J. A. Montgomery, Jr.,  
J. E. Peralta, F. Ogliaro, M. Bearpark, J. J. Heyd, E. Brothers,  
K. N. Kudin, V. N. Staroverov, T. Keith, R. Kobayashi, J.  
Normand,  
K. Raghavachari, A. Rendell, J. C. Burant, S. S. Iyengar, J.  
Tomasi,  
M. Cossi, N. Rega, J. M. Millam, M. Klene, J. E. Knox, J. B.  
Cross,  
V. Bakken, C. Adamo, J. Jaramillo, R. Gomperts, R. E. Stratmann,  
O. Yazyev, A. J. Austin, R. Cammi, C. Pomelli, J. W. Ochterski,  
R. L. Martin, K. Morokuma, V. G. Zakrzewski, G. A. Voth,  
P. Salvador, J. J. Dannenberg, S. Dapprich, A. D. Daniels,  
O. Farkas, J. B. Foresman, J. V. Ortiz, J. Cioslowski,  
and D. J. Fox, Gaussian, Inc., Wallingford CT, 2010.

\*\*\*\*\*  
Gaussian 09: IA32W-G09RevB.01 12-Aug-2010  
30-Nov-2013  
\*\*\*\*\*

```
%chk=PtCl62-SARCZORANMR
%nproc=2
Will use up to      2 processors via shared memory.
%mem=800mb
-----
-----
#p pbelpbe/gen nmr=giao integral(ultrafine) SCRF(solvent=water)
SCF(No
VarAcc,maxcycles=1000)
-----
-----
1/38=1/1;
2/12=2,17=6,18=5,40=1/2;
3/5=7,11=2,16=1,25=1,30=1,70=2201,72=1,74=-13,75=-5/1,2,8,3;
4//1;
5/5=2,7=1000,38=1,53=1/2;
8/6=1,10=90,11=11/1;
10/13=100,45=16/2;
6/7=2,8=2,9=2,10=2,28=1/1;
99/9=1/99;
Leave Link      1 at Sat Nov 30 20:45:07 2013, MaxMem= 104857600
cpu:          0.0
(Enter C:\G09W\l1101.exe)
-----
PtCl62-SARCZORA
-----
Symbolic Z-matrix:
Charge = -2 Multiplicity = 1
Pt          0.          0.          0.
Cl          0.          0.          2.3961
Cl          0.          2.3961      0.
Cl         -2.3961      0.          0.
Cl          2.3961      0.          0.
Cl          0.          -2.3961     0.
Cl          0.          0.          -2.3961

NAtoms=      7 NQM=      7 NQMF=      0 NMic=      0 NMicF=
0 NTot=      7.

                Isotopes and Nuclear Properties:
(Nuclear quadrupole moments (NQMom) in fm**2, nuclear magnetic
moments (NMagM)
in nuclear magnetons)

  Atom          1          2          3          4          5
6
7
IAtWgt=      195          35          35          35
35          35          35
AtmWgt= 194.9648000  34.9688527  34.9688527  34.9688527
34.9688527  34.9688527  34.9688527
```

```

NucSpn=          1          3          3          3
3              3              3
AtzEff=  0.0000000  0.0000000  0.0000000  0.0000000
0.0000000  0.0000000  0.0000000
NQMom=   0.0000000 -8.1650000 -8.1650000 -8.1650000 -
8.1650000 -8.1650000 -8.1650000
NMagM=   0.6095000  0.8218740  0.8218740  0.8218740
0.8218740  0.8218740  0.8218740
Leave Link 101 at Sat Nov 30 20:45:07 2013, MaxMem= 104857600
cpu:      0.0
(Enter C:\G09W\l202.exe)
    
```

Input orientation:

```

-----
-----
Center      Atomic      Atomic      Coordinates
(Angstroms)
Number      Number      Type        X          Y
Z
-----
-----
      1          78          0          0.000000  0.000000
0.000000
      2          17          0          0.000000  0.000000
2.396100
      3          17          0          0.000000  2.396100
0.000000
      4          17          0          -2.396100  0.000000
0.000000
      5          17          0          2.396100  0.000000
0.000000
      6          17          0          0.000000 -2.396100
0.000000
      7          17          0          0.000000  0.000000 -
2.396100
-----
    
```

Distance matrix (angstroms):

```

-----
-----
          1          2          3          4          5
1 Pt  0.000000
2 Cl  2.396100  0.000000
3 Cl  2.396100  3.388597  0.000000
4 Cl  2.396100  3.388597  3.388597  0.000000
5 Cl  2.396100  3.388597  3.388597  4.792200  0.000000
6 Cl  2.396100  3.388597  4.792200  3.388597  3.388597
7 Cl  2.396100  4.792200  3.388597  3.388597  3.388597
          6          7
6 Cl  0.000000
7 Cl  3.388597  0.000000
Stoichiometry   Cl6Pt(2-)
Framework group OH[O(Pt),3C4(Cl.Cl)]
    
```

Deg. of freedom 1  
Full point group OH NOp 48  
Largest Abelian subgroup D2H NOp 8  
Largest concise Abelian subgroup D2H NOp 8  
Standard orientation:

-----

| Center<br>(Angstroms)<br>Number | Atomic<br>Number | Atomic<br>Type | Coordinates<br>X Y |           |
|---------------------------------|------------------|----------------|--------------------|-----------|
| 1                               | 78               | 0              | 0.000000           | 0.000000  |
| 2                               | 17               | 0              | 0.000000           | 0.000000  |
| 3                               | 17               | 0              | 0.000000           | 2.396100  |
| 4                               | 17               | 0              | -2.396100          | 0.000000  |
| 5                               | 17               | 0              | 2.396100           | 0.000000  |
| 6                               | 17               | 0              | 0.000000           | -2.396100 |
| 7                               | 17               | 0              | 0.000000           | 0.000000  |

-----

-----

Rotational constants (GHZ): 0.6293119 0.6293119  
0.6293119  
Leave Link 202 at Sat Nov 30 20:45:07 2013, MaxMem= 104857600  
cpu: 0.0  
(Enter C:\G09W\l301.exe)  
General basis read from cards: (5D, 7F)  
Centers: 1  
S 6 1.00  
Exponent= 1.6896015676D+06 Coefficients= 5.7974482200D-02  
Exponent= 7.5093403004D+05 Coefficients= -1.3148538600D-02  
Exponent= 3.3374845779D+05 Coefficients= 1.2503763310D-01  
Exponent= 1.4833264791D+05 Coefficients= 9.1535752600D-02  
Exponent= 6.5925621293D+04 Coefficients= 3.2913880880D-01  
Exponent= 2.9300276130D+04 Coefficients= 5.3748713720D-01  
S 1 1.00  
Exponent= 1.3022344947D+04 Coefficients= 1.0000000000D+00  
S 1 1.00  
Exponent= 5.7877088650D+03 Coefficients= 1.0000000000D+00  
S 1 1.00  
Exponent= 2.5723150510D+03 Coefficients= 1.0000000000D+00  
S 1 1.00

|   |   |      |           |                   |               |                  |
|---|---|------|-----------|-------------------|---------------|------------------|
| S | 1 | 1.00 | Exponent= | 1.1432511340D+03  | Coefficients= | 1.0000000000D+00 |
| S | 1 | 1.00 | Exponent= | 5.08111161500D+02 | Coefficients= | 1.0000000000D+00 |
| S | 1 | 1.00 | Exponent= | 2.2582738400D+02  | Coefficients= | 1.0000000000D+00 |
| S | 1 | 1.00 | Exponent= | 1.0036772600D+02  | Coefficients= | 1.0000000000D+00 |
| S | 1 | 1.00 | Exponent= | 4.4607878000D+01  | Coefficients= | 1.0000000000D+00 |
| S | 1 | 1.00 | Exponent= | 1.9825724000D+01  | Coefficients= | 1.0000000000D+00 |
| S | 1 | 1.00 | Exponent= | 8.8114330000D+00  | Coefficients= | 1.0000000000D+00 |
| S | 1 | 1.00 | Exponent= | 3.9161920000D+00  | Coefficients= | 1.0000000000D+00 |
| S | 1 | 1.00 | Exponent= | 1.7405300000D+00  | Coefficients= | 1.0000000000D+00 |
| S | 1 | 1.00 | Exponent= | 7.7356900000D-01  | Coefficients= | 1.0000000000D+00 |
| S | 1 | 1.00 | Exponent= | 3.4380800000D-01  | Coefficients= | 1.0000000000D+00 |
| S | 1 | 1.00 | Exponent= | 1.5280400000D-01  | Coefficients= | 1.0000000000D+00 |
| P | 5 | 1.00 | Exponent= | 6.7913000000D-02  | Coefficients= | 1.0000000000D+00 |
| P | 1 | 1.00 | Exponent= | 2.3642643991D+04  | Coefficients= | 1.1403826400D-02 |
| P | 1 | 1.00 | Exponent= | 9.4570575960D+03  | Coefficients= | 1.7083256700D-02 |
| P | 1 | 1.00 | Exponent= | 3.7828230390D+03  | Coefficients= | 8.0886502700D-02 |
| P | 1 | 1.00 | Exponent= | 1.5131292150D+03  | Coefficients= | 2.5252184340D-01 |
| P | 1 | 1.00 | Exponent= | 6.0525168600D+02  | Coefficients= | 7.4017959180D-01 |
| P | 1 | 1.00 | Exponent= | 2.4210067400D+02  | Coefficients= | 1.0000000000D+00 |
| P | 1 | 1.00 | Exponent= | 9.6840270000D+01  | Coefficients= | 1.0000000000D+00 |
| P | 1 | 1.00 | Exponent= | 3.8736108000D+01  | Coefficients= | 1.0000000000D+00 |
| P | 1 | 1.00 | Exponent= | 1.5494443000D+01  | Coefficients= | 1.0000000000D+00 |
| P | 1 | 1.00 | Exponent= | 6.1977770000D+00  | Coefficients= | 1.0000000000D+00 |
| P | 1 | 1.00 | Exponent= | 2.4791110000D+00  | Coefficients= | 1.0000000000D+00 |
| P | 1 | 1.00 | Exponent= | 9.9164400000D-01  | Coefficients= | 1.0000000000D+00 |
| P | 1 | 1.00 | Exponent= | 3.9665800000D-01  | Coefficients= | 1.0000000000D+00 |
| P | 1 | 1.00 | Exponent= | 1.5866300000D-01  | Coefficients= | 1.0000000000D+00 |

```
      Exponent= 6.3465000000D-02 Coefficients= 1.0000000000D+00
D 4 1.00
      Exponent= 1.8110792460D+03 Coefficients= 7.6859038000D-03
      Exponent= 6.5857427100D+02 Coefficients= 4.3883054800D-02
      Exponent= 2.3948155300D+02 Coefficients= 2.4558000620D-01
      Exponent= 8.7084201000D+01 Coefficients= 8.0580963240D-01
D 1 1.00
      Exponent= 3.1666982000D+01 Coefficients= 1.0000000000D+00
D 1 1.00
      Exponent= 1.1515266000D+01 Coefficients= 1.0000000000D+00
D 1 1.00
      Exponent= 4.1873700000D+00 Coefficients= 1.0000000000D+00
D 1 1.00
      Exponent= 1.5226800000D+00 Coefficients= 1.0000000000D+00
D 1 1.00
      Exponent= 5.5370200000D-01 Coefficients= 1.0000000000D+00
D 1 1.00
      Exponent= 2.0134600000D-01 Coefficients= 1.0000000000D+00
D 1 1.00
      Exponent= 7.3217000000D-02 Coefficients= 1.0000000000D+00
F 4 1.00
      Exponent= 8.5141859000D+01 Coefficients= 6.3002593000D-02
      Exponent= 2.8380620000D+01 Coefficients= 2.9424498280D-01
      Exponent= 9.4602070000D+00 Coefficients= 5.6544272570D-01
      Exponent= 3.1534020000D+00 Coefficients= 3.7760481600D-01
F 1 1.00
      Exponent= 1.0511340000D+00 Coefficients= 1.0000000000D+00
F 1 1.00
      Exponent= 3.5037800000D-01 Coefficients= 1.0000000000D+00
```

\*\*\*\*

Centers: 2 3 4 5 6 7

6-31G(d,p)

\*\*\*\*

```
Ernie: Thresh= 0.10000D-02 Tol= 0.10000D-05 Strict=F.
There are 60 symmetry adapted basis functions of AG
symmetry.
There are 17 symmetry adapted basis functions of B1G
symmetry.
There are 17 symmetry adapted basis functions of B2G
symmetry.
There are 17 symmetry adapted basis functions of B3G
symmetry.
There are 6 symmetry adapted basis functions of AU
symmetry.
There are 34 symmetry adapted basis functions of B1U
symmetry.
There are 34 symmetry adapted basis functions of B2U
symmetry.
There are 34 symmetry adapted basis functions of B3U
symmetry.
```

Integral buffers will be 262144 words long.  
Raffenetti 2 integral format.  
Two-electron integral symmetry is turned on.  
219 basis functions, 505 primitive gaussians, 242  
cartesian basis functions  
91 alpha electrons 91 beta electrons  
nuclear repulsion energy 2394.3929937619 Hartrees.  
IExCor= 1009 DFT=T Ex+Corr=PBE1PBE ExCW=0 ScaHFX= 0.250000  
ScaDFX= 0.750000 0.750000 1.000000 1.000000 ScaleE2=  
1.000000 1.000000  
IRadAn= 5 IRanWt= -1 IRanGd= 0 ICorTp=0  
NAtoms= 7 NActive= 7 NUniq= 2 SFac= 4.00D+00 NATFMM=  
50 NAOKFM=F Big=F

-----  
-----  
Polarizable Continuum Model (PCM)  
=====

Model : PCM.  
Atomic radii : UFF (Universal Force Field).  
Polarization charges : Total charges.  
Charge compensation : None.  
Solution method : Matrix inversion.  
Cavity type : Scaled VdW (van der Waals Surface)  
(Alpha=1.100).  
Cavity algorithm : GePol (No added spheres)  
Default sphere list used, NSphG= 7.  
Lebedev-Laikov grids with approx. 5.0  
points / Ang\*\*2.  
Smoothing algorithm: Karplus/York  
(Gamma=1.0000).  
Polarization charges: spherical  
gaussians, with point-specific  
exponents (IZeta= 3).  
Self-potential: point-specific (ISelfS=  
7).  
Self-field : sphere-specific E.n sum  
rule (ISelfD= 2).  
Solvent : Water, Eps= 78.355300 Eps(inf)=  
1.777849

-----  
-----  
Spheres list:

| ISph     | on | Nord | Re0   | Alpha | Xe       | Ye       |
|----------|----|------|-------|-------|----------|----------|
| Ze       |    |      |       |       |          |          |
| 1        | Pt | 1    | 1.377 | 1.100 | 0.000000 | 0.000000 |
| 0.000000 |    |      |       |       |          |          |
| 2        | Cl | 2    | 1.974 | 1.100 | 0.000000 | 0.000000 |
| 2.396100 |    |      |       |       |          |          |



|           |    |   |       |       |           |           |
|-----------|----|---|-------|-------|-----------|-----------|
| 3         | Cl | 3 | 1.974 | 1.100 | 0.000000  | 2.396100  |
| 0.000000  |    |   |       |       |           |           |
| 4         | Cl | 4 | 1.974 | 1.100 | -2.396100 | 0.000000  |
| 0.000000  |    |   |       |       |           |           |
| 5         | Cl | 5 | 1.974 | 1.100 | 2.396100  | 0.000000  |
| 0.000000  |    |   |       |       |           |           |
| 6         | Cl | 6 | 1.974 | 1.100 | 0.000000  | -2.396100 |
| 0.000000  |    |   |       |       |           |           |
| 7         | Cl | 7 | 1.974 | 1.100 | 0.000000  | 0.000000  |
| -2.396100 |    |   |       |       |           |           |

```

-----
GePol: Number of generator spheres           =          7
GePol: Total number of spheres              =          7
GePol: Number of exposed spheres            =          6 (
85.71%)
GePol: Number of points                      =       1182
GePol: Average weight of points              =          0.19
GePol: Minimum weight of points              =       0.96D-05
GePol: Maximum weight of points              =       0.21616
GePol: Number of points with low weight      =          24
GePol: Fraction of low-weight points (<1% of avg) =
2.03%
GePol: Cavity surface area                   =       222.591
Ang**2
GePol: Cavity volume                         =       226.465
Ang**3
Leave Link 301 at Sat Nov 30 20:45:07 2013, MaxMem= 104857600
cpu:          0.0
(Enter C:\G09W\l302.exe)
NPDir=0 NMtPBC=          1 NCellOv=          1 NCell=          1 NClECP=          1
NCellD=          1
NCellK=          1 NCellE2=          1 NClLst=          1 CellRange=
0.0.
One-electron integrals computed using PRISM.
One-electron integral symmetry used in STVInt
NBasis= 219 RedAO= T NBF= 60 17 17 17 6 34
34 34
NBsUse= 219 1.00D-06 NBFU= 60 17 17 17 6 34
34 34
Precomputing XC quadrature grid using
IXCGrd= 2 IRadAn=          5 IRanWt=          -1 IRanGd=
0 AccXCQ= 0.00D+00.
Defaulting to unpruned grid for atomic number 78.
NRdTot= 559 NPtTot= 173268 NUsed= 175867 NTot=
175883
NSgBfM= 227 227 227 227 231 NAtAll= 7 7.
Leave Link 302 at Sat Nov 30 20:45:08 2013, MaxMem= 104857600
cpu:          1.0
(Enter C:\G09W\l308.exe)
    
```

```
Leave Link 308 at Sat Nov 30 20:45:08 2013, MaxMem= 104857600
cpu: 0.0
(Enter C:\G09W\l303.exe)
DipDrv: MaxL=1.
Leave Link 303 at Sat Nov 30 20:45:08 2013, MaxMem= 104857600
cpu: 0.0
(Enter C:\G09W\l401.exe)
Harris functional with IExCor= 1009 diagonalized for initial
guess.
ExpMin= 6.35D-02 ExpMax= 1.69D+06 ExpMxC= 1.69D+06 IAcc=4
IRadAn= 5 AccDes= 0.00D+00
HarFok: IExCor= 1009 AccDes= 0.00D+00 IRadAn= 5 IDoV= 1
ScaDFX= 1.000000 1.000000 1.000000 1.000000
Defaulting to unpruned grid for atomic number 78.
Defaulting to unpruned grid for atomic number 78.
FoFCou: FMM=F IPFlag= 0 FMFlag= 100000 FMFlg1=
0
NFxFlg= 0 DoJE=T BraDBF=F KetDBF=T FulRan=T
Omega= 0.000000 0.000000 1.000000 0.000000 0.000000
ICntrl= 500 IOpCl= 0
NMat0= 1 NMatS0= 1 NMatT0= 0 NMatD0= 1
NMtDS0= 0 NMtDT0= 0
IlCent= 4 NGrid= 0.
Petite list used in FoFCou.
Harris En= -20085.9406129799
Initial guess orbital symmetries:
Occupied (A1G) (A1G) (T1U) (T1U) (T1U) (A1G) (EG) (EG)
(T1U) (T1U) (T1U) (A1G) (T1U) (T1U) (T1U) (EG)
(EG) (T2G) (T2G) (T2G) (A1G) (T1U) (T1U) (T1U)
(EG) (EG) (T2G) (T2G) (T2G) (A1G) (EG) (EG)
(T1U)
(T1U) (T1U) (T1U) (T1U) (T1U) (EG) (EG) (A1G)
(T2G) (T2G) (T2G) (T1U) (T1U) (T1U) (T1G) (T1G)
(T1G) (T2U) (T2U) (T2U) (A1G) (T1U) (T1U) (T1U)
(T2U) (T2U) (T2U) (A2U) (T1U) (T1U) (T1U) (A1G)
(EG) (EG) (T1U) (T1U) (T1U) (A1G) (EG) (EG)
(T2G)
(T2G) (T2G) (T1U) (T1U) (T1U) (T2U) (T2U) (T2U)
(T1U) (T1U) (T1U) (T1G) (T1G) (T1G) (T2G) (T2G)
(T2G)
Virtual (EG) (EG) (A1G) (T1U) (T1U) (T1U) (EG) (EG)
(A1G)
(T2G) (T2G) (T2G) (T1U) (T1U) (T1U) (T1U) (T1U)
(T1U) (EG) (EG) (A1G) (T2G) (T2G) (T2G) (T2U)
(T2U) (T2U) (T1U) (T1U) (T1U) (T1G) (T1G) (T1G)
(EG) (EG) (T2U) (T2U) (T2U) (T2G) (T2G) (T2G)
(T1U) (T1U) (T1U) (A2U) (EU) (EU) (A2G) (T2U)
(T2U) (T2U) (T1G) (T1G) (T1G) (T1U) (T1U) (T1U)
(T2G) (T2G) (T2G) (A1G) (EG) (EG) (A2U) (EG)
(EG)
```

```
(T1U) (T1U) (T1U) (T2G) (T2G) (T2G) (T2U) (T2U)
(T2U) (A1G) (T1U) (T1U) (T1U) (EG) (EG) (A1G)
(T1U) (T1U) (T1U) (A2U) (T2U) (T2U) (T2U) (T1U)
(T1U) (T1U) (T2G) (T2G) (T2G) (EG) (EG) (A1G)
(T1U) (T1U) (T1U) (T2G) (T2G) (T2G) (EG) (EG)
(A1G) (T1U) (T1U) (T1U) (T2G) (T2G) (T2G) (EG)
(EG) (A1G) (T1U) (T1U) (T1U) (A1G) (T1U) (T1U)
(T1U) (A1G) (A1G) (A1G) (A1G) (A1G)
```

```
The electronic state of the initial guess is 1-A1G.
Leave Link 401 at Sat Nov 30 20:45:09 2013, MaxMem= 104857600
cpu: 1.0
(Enter C:\G09W\l502.exe)
Closed shell SCF:
Requested convergence on RMS density matrix=1.00D-08 within1000
cycles.
Requested convergence on MAX density matrix=1.00D-06.
Requested convergence on energy=1.00D-06.
No special actions if energy rises.
Using DIIS extrapolation, IDIIS= 1040.
Integral symmetry usage will be decided dynamically.
175798 words used for storage of precomputed grid.
IEnd= 1362924 IEndB= 1362924 NGot= 104857600 MDV=
104555483
LenX= 104555483 LenY= 104496478
Fock matrices will be formed incrementally for 20 cycles.

Cycle 1 Pass 1 IDiag 1:
FoFCou: FMM=F IPFlag= 0 FMFlag= 100000 FMFlg1=
0
NFxFlg= 0 DoJE=F BraDBF=F KetDBF=F FulRan=T
Omega= 0.000000 0.000000 1.000000 0.000000 0.000000
ICntrl= 0 IOpCl= 0
NMat0= 1 NMatS0= 1 NMatT0= 0 NMatD0= 1
NMtDS0= 0 NMtDT0= 0
I1Cent= 0 NGrid= 0.
Petite list used in FoFCou.
Defaulting to unpruned grid for atomic number 78.
Defaulting to unpruned grid for atomic number 78.
E= -20071.6528367638
DIIS: error= 1.68D+00 at cycle 1 NSaved= 1.
NSaved= 1 IEnMin= 1 EnMin= -20071.6528367638 IErMin= 1
ErrMin= 1.68D+00
ErrMax= 1.68D+00 EMaxC= 1.00D-01 BMatC= 3.15D+02 BMatP= 3.15D+02
IDIUse=3 WtCom= 0.00D+00 WtEn= 1.00D+00
Coeff-Com: 0.100D+01
Coeff-En: 0.100D+01
Coeff: 0.100D+01
Gap= 0.046 Goal= None Shift= 0.000
GapD= 0.046 DampG=0.250 DampE=0.125 DampFc=0.1250 IDamp=-1.
Damping current iteration by 1.25D-01
```

```
RMSDP=1.80D-02 MaxDP=7.71D-01          OVMax= 9.19D-01

Cycle 2 Pass 1 IDiag 1:
Density matrix breaks symmetry, PCut= 1.00D-04
Density has only Abelian symmetry.
RMSU= 1.58D-03 CP: 1.01D+00
E= -20072.5968600722 Delta-E= -0.944023308348 Rises=F
Damp=T
DIIS: error= 1.47D+00 at cycle 2 NSaved= 2.
NSaved= 2 IEnMin= 2 EnMin= -20072.5968600722 IErMin= 2
ErrMin= 1.47D+00
ErrMax= 1.47D+00 EMaxC= 1.00D-01 BMatC= 2.28D+02 BMatP= 3.15D+02
IDIUse=3 WtCom= 0.00D+00 WtEn= 1.00D+00
Coeff-Com: -0.533D+01 0.633D+01
Coeff-En: 0.000D+00 0.100D+01
Coeff: 0.000D+00 0.100D+01
Gap= 0.000 Goal= None Shift= 0.000
RMSDP=1.18D-02 MaxDP=4.10D-01 DE=-9.44D-01 OVMax= 1.93D-01

Cycle 3 Pass 1 IDiag 1:
Density matrix breaks symmetry, PCut= 1.00D-04
Density has only Abelian symmetry.
RMSU= 5.75D-03 CP: 1.03D+00 3.00D+00
E= -20070.6464423890 Delta-E= 1.950417683140 Rises=F
Damp=F
DIIS: error= 3.87D-01 at cycle 3 NSaved= 3.
NSaved= 3 IEnMin= 2 EnMin= -20072.5968600722 IErMin= 3
ErrMin= 3.87D-01
ErrMax= 3.87D-01 EMaxC= 1.00D-01 BMatC= 2.02D+01 BMatP= 2.28D+02
IDIUse=3 WtCom= 0.00D+00 WtEn= 1.00D+00
EnCoef did 100 forward-backward iterations
Coeff-Com: 0.146D+01-0.150D+01 0.104D+01
Coeff-En: 0.519D+00 0.369D-01 0.444D+00
Coeff: 0.519D+00 0.369D-01 0.444D+00
Gap= 0.063 Goal= None Shift= 0.000
RMSDP=1.15D-02 MaxDP=5.09D-01 DE= 1.95D+00 OVMax= 6.24D-01

Cycle 4 Pass 1 IDiag 1:
Density matrix breaks symmetry, PCut= 1.00D-04
Density has only Abelian symmetry.
RMSU= 2.64D-03 CP: 1.01D+00 1.26D+00 6.65D-02
E= -20075.0629684166 Delta-E= -4.416526027617 Rises=F
Damp=F
DIIS: error= 9.23D-02 at cycle 4 NSaved= 4.
NSaved= 4 IEnMin= 4 EnMin= -20075.0629684166 IErMin= 4
ErrMin= 9.23D-02
ErrMax= 9.23D-02 EMaxC= 1.00D-01 BMatC= 1.41D+00 BMatP= 2.02D+01
IDIUse=3 WtCom= 7.67D-02 WtEn= 9.23D-01
Coeff-Com: -0.587D+00 0.727D+00-0.663D-01 0.926D+00
Coeff-En: 0.000D+00 0.000D+00 0.963D-01 0.904D+00
```

Coeff: -0.450D-01 0.557D-01 0.838D-01 0.905D+00  
Gap= 0.024 Goal= None Shift= 0.000  
RMSDP=6.72D-03 MaxDP=4.08D-01 DE=-4.42D+00 OVMax= 7.70D-01

Cycle 5 Pass 1 IDiag 1:  
Density matrix breaks symmetry, PCut= 1.00D-04  
Density has only Abelian symmetry.  
RMSU= 3.69D-03 CP: 1.02D+00 2.89D+00 9.75D-02 4.26D-01  
E= -20074.5962490756 Delta-E= 0.466719341046 Rises=F  
Damp=F  
DIIS: error= 7.21D-02 at cycle 5 NSaved= 5.  
NSaved= 5 IEnMin= 4 EnMin= -20075.0629684166 IErMin= 5  
ErrMin= 7.21D-02  
ErrMax= 7.21D-02 EMaxC= 1.00D-01 BMatC= 1.12D+00 BMatP= 1.41D+00  
IDIUse=3 WtCom= 2.79D-01 WtEn= 7.21D-01  
Coeff-Com: 0.995D-01-0.103D+00-0.625D-01 0.534D+00 0.532D+00  
Coeff-En: 0.000D+00 0.000D+00 0.000D+00 0.627D+00 0.373D+00  
Coeff: 0.277D-01-0.287D-01-0.174D-01 0.601D+00 0.417D+00  
Gap= 0.103 Goal= None Shift= 0.000  
RMSDP=3.81D-03 MaxDP=2.72D-01 DE= 4.67D-01 OVMax= 2.89D-01

Cycle 6 Pass 1 IDiag 1:  
Density matrix breaks symmetry, PCut= 1.00D-04  
Density has only Abelian symmetry.  
RMSU= 6.37D-04 CP: 1.01D+00 1.77D+00 7.42D-02 7.45D-01  
5.29D-01  
E= -20075.4996116995 Delta-E= -0.903362623871 Rises=F  
Damp=F  
DIIS: error= 1.25D-02 at cycle 6 NSaved= 6.  
NSaved= 6 IEnMin= 6 EnMin= -20075.4996116995 IErMin= 6  
ErrMin= 1.25D-02  
ErrMax= 1.25D-02 EMaxC= 1.00D-01 BMatC= 2.27D-02 BMatP= 1.12D+00  
IDIUse=3 WtCom= 8.75D-01 WtEn= 1.25D-01  
Coeff-Com: -0.449D-01 0.531D-01 0.145D-02 0.901D-01-0.474D-01  
0.948D+00  
Coeff-En: 0.000D+00 0.000D+00 0.000D+00 0.000D+00 0.000D+00  
0.100D+01  
Coeff: -0.393D-01 0.465D-01 0.127D-02 0.788D-01-0.414D-01  
0.954D+00  
Gap= 0.149 Goal= None Shift= 0.000  
RMSDP=6.48D-04 MaxDP=3.07D-02 DE=-9.03D-01 OVMax= 5.71D-02

Cycle 7 Pass 1 IDiag 1:  
Density matrix breaks symmetry, PCut= 1.00D-04  
Density has only Abelian symmetry.  
RMSU= 2.22D-04 CP: 1.01D+00 1.68D+00 7.12D-02 8.10D-01  
4.45D-01  
CP: 8.28D-01  
E= -20075.5083283120 Delta-E= -0.008716612516 Rises=F  
Damp=F

DIIS: error= 3.50D-03 at cycle 7 NSaved= 7.  
NSaved= 7 IEnMin= 7 EnMin= -20075.5083283120 IErMin= 7  
ErrMin= 3.50D-03  
ErrMax= 3.50D-03 EMaxC= 1.00D-01 BMatC= 1.67D-03 BMatP= 2.27D-02  
IDIUse=3 WtCom= 9.65D-01 WtEn= 3.50D-02  
Coeff-Com: -0.290D-01 0.335D-01 0.198D-02 0.235D-01-0.200D-01  
0.413D+00  
Coeff-Com: 0.577D+00  
Coeff-En: 0.000D+00 0.000D+00 0.000D+00 0.000D+00 0.000D+00  
0.141D+00  
Coeff-En: 0.859D+00  
Coeff: -0.280D-01 0.324D-01 0.191D-02 0.226D-01-0.193D-01  
0.403D+00  
Coeff: 0.587D+00  
Gap= 0.148 Goal= None Shift= 0.000  
RMSDP=2.03D-04 MaxDP=1.08D-02 DE=-8.72D-03 OVMax= 1.42D-02

Cycle 8 Pass 1 IDiag 1:  
Density matrix breaks symmetry, PCut= 1.00D-04  
Density has only Abelian symmetry.  
RMSU= 2.97D-05 CP: 1.01D+00 1.70D+00 7.24D-02 7.98D-01  
4.62D-01

CP: 9.22D-01 5.55D-01  
E= -20075.5098738114 Delta-E= -0.001545499465 Rises=F  
Damp=F

DIIS: error= 3.00D-04 at cycle 8 NSaved= 8.  
NSaved= 8 IEnMin= 8 EnMin= -20075.5098738114 IErMin= 8  
ErrMin= 3.00D-04  
ErrMax= 3.00D-04 EMaxC= 1.00D-01 BMatC= 1.14D-05 BMatP= 1.67D-03  
IDIUse=3 WtCom= 9.97D-01 WtEn= 3.00D-03  
Coeff-Com: -0.672D-02 0.771D-02-0.249D-04 0.296D-02-0.844D-03  
0.648D-01  
Coeff-Com: 0.151D+00 0.781D+00  
Coeff-En: 0.000D+00 0.000D+00 0.000D+00 0.000D+00 0.000D+00  
0.000D+00  
Coeff-En: 0.000D+00 0.100D+01  
Coeff: -0.670D-02 0.769D-02-0.249D-04 0.295D-02-0.841D-03  
0.646D-01  
Coeff: 0.151D+00 0.782D+00  
Gap= 0.148 Goal= None Shift= 0.000  
RMSDP=2.33D-05 MaxDP=8.82D-04 DE=-1.55D-03 OVMax= 1.96D-03

Cycle 9 Pass 1 IDiag 1:  
Density matrix breaks symmetry, PCut= 1.00D-04  
Density has only Abelian symmetry.  
RMSU= 7.98D-06 CP: 1.01D+00 1.70D+00 7.24D-02 7.98D-01  
4.64D-01

CP: 9.17D-01 6.08D-01 8.49D-01  
E= -20075.5098860747 Delta-E= -0.000012263266 Rises=F  
Damp=F

DIIS: error= 1.34D-04 at cycle 9 NSaved= 9.  
NSaved= 9 IEnMin= 9 EnMin= -20075.5098860747 IErMin= 9  
ErrMin= 1.34D-04  
ErrMax= 1.34D-04 EMaxC= 1.00D-01 BMatC= 2.38D-06 BMatP= 1.14D-05  
IDIUse=3 WtCom= 9.99D-01 WtEn= 1.34D-03  
EnCoef did 1 forward-backward iterations  
Coeff-Com: -0.190D-03 0.210D-03-0.554D-04 0.244D-03-0.128D-03  
0.566D-02  
Coeff-Com: 0.243D-01 0.229D+00 0.741D+00  
Coeff-En: 0.000D+00 0.000D+00 0.000D+00 0.000D+00 0.000D+00  
0.000D+00  
Coeff-En: 0.000D+00 0.104D-01 0.990D+00  
Coeff: -0.190D-03 0.210D-03-0.553D-04 0.244D-03-0.128D-03  
0.565D-02  
Coeff: 0.243D-01 0.229D+00 0.741D+00  
Gap= 0.148 Goal= None Shift= 0.000  
RMSDP=4.68D-06 MaxDP=1.77D-04 DE=-1.23D-05 OVMax= 1.67D-04

Cycle 10 Pass 1 IDiag 1:  
Restarting incremental Fock formation.  
E= -20075.5098871556 Delta-E= -0.000001080847 Rises=F  
Damp=F  
DIIS: error= 4.83D-05 at cycle 10 NSaved= 10.  
NSaved=10 IEnMin=10 EnMin= -20075.5098871556 IErMin=10  
ErrMin= 4.83D-05  
ErrMax= 4.83D-05 EMaxC= 1.00D-01 BMatC= 4.19D-07 BMatP= 2.38D-06  
IDIUse=1 WtCom= 1.00D+00 WtEn= 0.00D+00  
Coeff-Com: 0.357D-03-0.409D-03 0.136D-04-0.219D-04-0.349D-03-  
0.579D-04  
Coeff-Com: 0.299D-02 0.638D-01 0.189D+00 0.744D+00  
Coeff: 0.357D-03-0.409D-03 0.136D-04-0.219D-04-0.349D-03-  
0.579D-04  
Coeff: 0.299D-02 0.638D-01 0.189D+00 0.744D+00  
Gap= 0.148 Goal= None Shift= 0.000  
RMSDP=2.95D-06 MaxDP=2.01D-04 DE=-1.08D-06 OVMax= 1.86D-04

Cycle 11 Pass 1 IDiag 1:  
RMSU= 2.05D-06 CP: 1.00D+00  
E= -20075.5098875284 Delta-E= -0.000000372831 Rises=F  
Damp=F  
DIIS: error= 6.85D-06 at cycle 11 NSaved= 11.  
NSaved=11 IEnMin=11 EnMin= -20075.5098875284 IErMin=11  
ErrMin= 6.85D-06  
ErrMax= 6.85D-06 EMaxC= 1.00D-01 BMatC= 5.40D-09 BMatP= 4.19D-07  
IDIUse=1 WtCom= 1.00D+00 WtEn= 0.00D+00  
Coeff-Com: 0.357D-04-0.407D-04 0.696D-06 0.234D-04-0.179D-04  
0.146D-03  
Coeff-Com: 0.418D-03 0.114D-02-0.212D-01 0.256D-01 0.994D+00  
Coeff: 0.357D-04-0.407D-04 0.696D-06 0.234D-04-0.179D-04  
0.146D-03

```
Coeff:      0.418D-03 0.114D-02-0.212D-01 0.256D-01 0.994D+00
Gap=      0.148 Goal=  None      Shift=      0.000
RMSDP=2.32D-07 MaxDP=9.22D-06 DE=-3.73D-07 OVMaX= 1.25D-05

Cycle 12 Pass 1 IDiag 1:
RMSU= 1.10D-07 CP: 1.00D+00 1.05D+00
E= -20075.5098875305 Delta-E= -0.000000002110 Rises=F
Damp=F
DIIS: error= 5.57D-07 at cycle 12 NSaved= 12.
NSaved=12 IEnMin=12 EnMin= -20075.5098875305 IErMin=12
ErrMin= 5.57D-07
ErrMax= 5.57D-07 EMaxC= 1.00D-01 BMatC= 5.37D-11 BMatP= 5.40D-09
IDIUse=1 WtCom= 1.00D+00 WtEn= 0.00D+00
Coeff-Com: 0.808D-05-0.917D-05-0.584D-07 0.904D-05-0.405D-05
0.654D-04
Coeff-Com: 0.154D-03 0.427D-03-0.665D-02 0.105D-02 0.279D+00
0.726D+00
Coeff:      0.808D-05-0.917D-05-0.584D-07 0.904D-05-0.405D-05
0.654D-04
Coeff:      0.154D-03 0.427D-03-0.665D-02 0.105D-02 0.279D+00
0.726D+00
Gap=      0.148 Goal=  None      Shift=      0.000
RMSDP=4.39D-08 MaxDP=1.68D-06 DE=-2.11D-09 OVMaX= 1.03D-06

Cycle 13 Pass 1 IDiag 1:
RMSU= 2.49D-08 CP: 1.00D+00 1.05D+00 8.99D-01
E= -20075.5098875308 Delta-E= -0.000000000302 Rises=F
Damp=F
DIIS: error= 3.28D-07 at cycle 13 NSaved= 13.
NSaved=13 IEnMin=13 EnMin= -20075.5098875308 IErMin=13
ErrMin= 3.28D-07
ErrMax= 3.28D-07 EMaxC= 1.00D-01 BMatC= 1.55D-11 BMatP= 5.37D-11
IDIUse=1 WtCom= 1.00D+00 WtEn= 0.00D+00
Coeff-Com: 0.236D-06-0.259D-06 0.136D-07 0.774D-06-0.691D-06
0.919D-05
Coeff-Com: 0.267D-04 0.142D-03-0.374D-03-0.226D-02-0.824D-02
0.164D+00
Coeff-Com: 0.846D+00
Coeff:      0.236D-06-0.259D-06 0.136D-07 0.774D-06-0.691D-06
0.919D-05
Coeff:      0.267D-04 0.142D-03-0.374D-03-0.226D-02-0.824D-02
0.164D+00
Coeff:      0.846D+00
Gap=      0.148 Goal=  None      Shift=      0.000
RMSDP=1.35D-08 MaxDP=5.45D-07 DE=-3.02D-10 OVMaX= 9.67D-07

Cycle 14 Pass 1 IDiag 1:
RMSU= 2.33D-09 CP: 1.00D+00 1.06D+00 9.46D-01 8.95D-01
E= -20075.5098875309 Delta-E= -0.000000000146 Rises=F
Damp=F
```



DIIS: error= 4.02D-08 at cycle 14 NSaved= 14.  
NSaved=14 IEnMin=14 EnMin= -20075.5098875309 IErMin=14  
ErrMin= 4.02D-08  
ErrMax= 4.02D-08 EMaxC= 1.00D-01 BMatC= 2.07D-13 BMatP= 1.55D-11  
IDIUse=1 WtCom= 1.00D+00 WtEn= 0.00D+00  
Coeff-Com: -0.361D-07 0.405D-07-0.367D-08-0.531D-07 0.104D-06-  
0.431D-06  
Coeff-Com: 0.110D-05 0.784D-05-0.437D-04-0.545D-03-0.346D-02  
0.102D-03  
Coeff-Com: 0.368D-01 0.967D+00  
Coeff: -0.361D-07 0.405D-07-0.367D-08-0.531D-07 0.104D-06-  
0.431D-06  
Coeff: 0.110D-05 0.784D-05-0.437D-04-0.545D-03-0.346D-02  
0.102D-03  
Coeff: 0.368D-01 0.967D+00  
Gap= 0.148 Goal= None Shift= 0.000  
RMSDP=1.93D-09 MaxDP=8.24D-08 DE=-1.46D-10 OVMax= 1.44D-07

Error on total polarization charges = 0.01774  
SCF Done: E(RPBE1PBE) = -20075.5098875 A.U. after 14  
cycles  
Conv = 0.1932D-08 -V/T = 2.0014  
KE= 2.004828796335D+04 PE=-5.262142360706D+04 EE=  
1.010323276242D+04  
Leave Link 502 at Sat Nov 30 20:47:18 2013, MaxMem= 104857600  
cpu: 129.0  
(Enter C:\G09W\l801.exe)  
Range of M.O.s used for correlation: 1 219  
NBasis= 219 NAE= 91 NBE= 91 NFC= 0 NFV= 0  
NRorb= 219 NOA= 91 NOB= 91 NVA= 128 NVB= 128

\*\*\*\* Warning!!: The largest alpha MO coefficient is  
0.12744021D+02

Leave Link 801 at Sat Nov 30 20:47:18 2013, MaxMem= 104857600  
cpu: 0.0  
(Enter C:\G09W\l1002.exe)  
Minotr: Closed shell wavefunction.  
NEqPCM: Using equilibrium solvation (IEInf=0, Eps= 78.3553,  
EpsInf= 1.7778)  
Direct CPHF calculation.  
Differentiating once with respect to magnetic field  
using GIAOs.  
Electric field/nuclear overlap derivatives assumed to  
be zero.  
Using symmetry in CPHF.  
Requested convergence is 1.0D-08 RMS, and 1.0D-07  
maximum.  
Secondary convergence is 1.0D-12 RMS, and 1.0D-12  
maximum.

```
NewPWx=T KeepS1=F KeepF1=F KeepIn=T MapXYZ=F SortEE=F
KeepMc=T.
MDV=      104857554 using IRadAn=      1.
Defaulting to unpruned grid for atomic number 78.
Generate precomputed XC quadrature information.
Solving linear equations simultaneously, MaxMat=
0.
FoFCou: FMM=F IPFlag=      0 FMFlag=    10101102 FMFlg1=
0
NFxFlg=    40000000 DoJE=F BraDBF=F KetDBF=T FulRan=T
Omega=    0.000000  0.000000  1.000000  0.000000  0.000000
ICntrl=    6100 IOpCl=  0
NMat0=     1 NMatS0=     1 NMatT0=     0 NMatD0=     1
NMtDS0=    0 NMtDT0=    0
I1Cent=      7 NGrid=    1189.
Symmetry not used in FoFCou.
Defaulting to unpruned grid for atomic number 78.
Defaulting to unpruned grid for atomic number 78.
Integrals replicated using symmetry in FoFDir.
MinBra= 0 MaxBra= 3 Meth= 1.
IRaf=      0 NMat=     3 IRICut=      1 DoRegI=T DoRafI=F
ISym2E= 2 JSym2E=2.
There are      3 degrees of freedom in the 1st order
CPHF. IDoFFX=0.
3 vectors produced by pass 0 Test12= 3.88D-13 3.33D-08
XBig12= 5.13D+00 1.57D+00.
AX will form      3 AO Fock derivatives at one time.
3 vectors produced by pass 1 Test12= 3.88D-13 3.33D-08
XBig12= 6.45D-02 1.72D-01.
3 vectors produced by pass 2 Test12= 3.88D-13 3.33D-08
XBig12= 1.52D-03 2.72D-02.
3 vectors produced by pass 3 Test12= 3.88D-13 3.33D-08
XBig12= 1.26D-05 1.85D-03.
3 vectors produced by pass 4 Test12= 3.88D-13 3.33D-08
XBig12= 8.51D-08 1.35D-04.
3 vectors produced by pass 5 Test12= 3.88D-13 3.33D-08
XBig12= 2.74D-10 6.75D-06.
3 vectors produced by pass 6 Test12= 3.88D-13 3.33D-08
XBig12= 6.47D-13 2.70D-07.
Inverted reduced A of dimension 21 with in-core refinement.
Calculating GIAO nuclear magnetic shielding tensors.
SCF GIAO Magnetic shielding tensor (ppm):
1 Pt Isotropic = -1600.4199 Anisotropy = 0.0001
XX= -1600.4199 YX= 0.0000 ZX= 0.0000
XY= 0.0000 YY= -1600.4199 ZY= 0.0000
XZ= 0.0000 YZ= 0.0000 ZZ= -1600.4199
Eigenvalues: -1600.4199 -1600.4199 -1600.4199
2 Cl Isotropic = 846.4486 Anisotropy = 374.8435
XX= 721.5008 YX= 0.0000 ZX= 0.0000
XY= 0.0000 YY= 721.5008 ZY= 0.0000
```

```
XZ= 0.0000 YZ= 0.0000 ZZ= 1096.3443
Eigenvalues: 721.5008 721.5008 1096.3443
3 Cl Isotropic = 846.4486 Anisotropy = 374.8435
XX= 721.5008 YX= 0.0000 ZX= 0.0000
XY= 0.0000 YY= 1096.3443 ZY= 0.0000
XZ= 0.0000 YZ= 0.0000 ZZ= 721.5008
Eigenvalues: 721.5008 721.5008 1096.3443
4 Cl Isotropic = 846.4487 Anisotropy = 374.8435
XX= 1096.3443 YX= 0.0000 ZX= 0.0000
XY= 0.0000 YY= 721.5008 ZY= 0.0000
XZ= 0.0000 YZ= 0.0000 ZZ= 721.5008
Eigenvalues: 721.5008 721.5008 1096.3443
5 Cl Isotropic = 846.4487 Anisotropy = 374.8435
XX= 1096.3443 YX= 0.0000 ZX= 0.0000
XY= 0.0000 YY= 721.5008 ZY= 0.0000
XZ= 0.0000 YZ= 0.0000 ZZ= 721.5008
Eigenvalues: 721.5008 721.5008 1096.3443
6 Cl Isotropic = 846.4486 Anisotropy = 374.8435
XX= 721.5008 YX= 0.0000 ZX= 0.0000
XY= 0.0000 YY= 1096.3443 ZY= 0.0000
XZ= 0.0000 YZ= 0.0000 ZZ= 721.5008
Eigenvalues: 721.5008 721.5008 1096.3443
7 Cl Isotropic = 846.4486 Anisotropy = 374.8435
XX= 721.5008 YX= 0.0000 ZX= 0.0000
XY= 0.0000 YY= 721.5008 ZY= 0.0000
XZ= 0.0000 YZ= 0.0000 ZZ= 1096.3443
Eigenvalues: 721.5008 721.5008 1096.3443
End of Minotr Frequency-dependent properties file 721 does not
exist.
End of Minotr Frequency-dependent properties file 722 does not
exist.
Leave Link 1002 at Sat Nov 30 20:53:50 2013, MaxMem= 104857600
cpu: 392.0
(Enter C:\G09W\l601.exe)
Copying SCF densities to generalized density rwf, IOpCl= 0
IROHF=0.
```

```
*****
*****
```

Population analysis using the SCF density.

```
*****
*****
```

Orbital symmetries:

```
Occupied (A1G) (A1G) (T1U) (T1U) (T1U) (A1G) (A1G) (EG)
          (EG) (T1U) (T1U) (T1U) (T1U) (T1U) (T1U) (EG)
```

|       |         |                                                 |
|-------|---------|-------------------------------------------------|
|       |         | (EG) (T2G) (T2G) (T2G) (A1G) (T1U) (T1U) (T1U)  |
|       |         | (EG) (EG) (T2G) (T2G) (T2G) (A1G) (EG) (EG)     |
| (T1U) |         | (T1U) (T1U) (T1U) (T1U) (T1U) (EG) (EG) (A1G)   |
|       |         | (T2G) (T2G) (T2G) (T1U) (T1U) (T1U) (T1G) (T1G) |
|       |         | (T1G) (T2U) (T2U) (T2U) (T1U) (T1U) (T1U) (T2U) |
|       |         | (T2U) (T2U) (A2U) (A1G) (T1U) (T1U) (T1U) (A1G) |
|       |         | (EG) (EG) (T1U) (T1U) (T1U) (EG) (EG) (T2G)     |
| (T2G) |         | (T2G) (A1G) (T1U) (T1U) (T1U) (T2U) (T2U) (T2U) |
|       |         | (T1U) (T1U) (T1U) (T2G) (T2G) (T2G) (T1G) (T1G) |
|       |         | (T1G)                                           |
|       | Virtual | (EG) (EG) (A1G) (T1U) (T1U) (T1U) (EG) (EG)     |
| (A1G) |         | (T2G) (T2G) (T2G) (T1U) (T1U) (T1U) (EG) (EG)   |
|       |         | (T1U) (T1U) (T1U) (A1G) (T2G) (T2G) (T2G) (T2U) |
|       |         | (T2U) (T2U) (T1U) (T1U) (T1U) (T1G) (T1G) (T1G) |
|       |         | (EG) (EG) (T2U) (T2U) (T2U) (T2G) (T2G) (T2G)   |
|       |         | (T1U) (T1U) (T1U) (A2U) (T1U) (T1U) (T1U) (EU)  |
|       |         | (EU) (A2G) (T1G) (T1G) (T1G) (T2U) (T2U) (T2U)  |
|       |         | (A1G) (EG) (EG) (T2G) (T2G) (T2G) (A2U) (EG)    |
| (EG)  |         | (T1U) (T1U) (T1U) (T2U) (T2U) (T2U) (T2G) (T2G) |
|       |         | (T2G) (A1G) (T1U) (T1U) (T1U) (A1G) (EG) (EG)   |
|       |         | (T1U) (T1U) (T1U) (A2U) (T2U) (T2U) (T2U) (T2G) |
|       |         | (T2G) (T2G) (T1U) (T1U) (T1U) (EG) (EG) (A1G)   |
|       |         | (T1U) (T1U) (T1U) (T2G) (T2G) (T2G) (EG) (EG)   |
|       |         | (A1G) (T1U) (T1U) (T1U) (T2G) (T2G) (T2G) (EG)  |
|       |         | (EG) (A1G) (T1U) (T1U) (T1U) (A1G) (T1U) (T1U)  |
|       |         | (T1U) (A1G) (A1G) (A1G) (A1G) (A1G)             |

The electronic state is 1-A1G.

Alpha occ. eigenvalues -- \*\*\*\*\*-437.58229-419.71174-  
 419.71174-419.71174  
 Alpha occ. eigenvalues -- -102.86118-101.65848-101.65846-  
 101.65846-101.65845  
 Alpha occ. eigenvalues -- -101.65845-101.65845 -94.46828 -  
 94.46828 -94.46828  
 Alpha occ. eigenvalues -- -79.67096 -79.67096 -79.67046 -  
 79.67046 -79.67046  
 Alpha occ. eigenvalues -- -21.93240 -18.34345 -18.34345 -  
 18.34345 -11.98855  
 Alpha occ. eigenvalues -- -11.98855 -11.98455 -11.98455 -  
 11.98455 -9.48463  
 Alpha occ. eigenvalues -- -9.48460 -9.48460 -9.48457 -  
 9.48457 -9.48457  
 Alpha occ. eigenvalues -- -7.21858 -7.21858 -7.21858 -  
 7.21858 -7.21858  
 Alpha occ. eigenvalues -- -7.21854 -7.21136 -7.21136 -  
 7.21136 -7.21135

|                            |          |          |          |   |
|----------------------------|----------|----------|----------|---|
| Alpha occ. eigenvalues --  | -7.21135 | -7.21135 | -7.21135 | - |
| 7.21135 -7.21135           |          |          |          |   |
| Alpha occ. eigenvalues --  | -7.21133 | -7.21133 | -7.21133 | - |
| 3.42006 -3.42006           |          |          |          |   |
| Alpha occ. eigenvalues --  | -3.42006 | -3.41627 | -3.41627 | - |
| 3.41627 -3.41154           |          |          |          |   |
| Alpha occ. eigenvalues --  | -3.20767 | -2.07611 | -2.07611 | - |
| 2.07611 -0.79746           |          |          |          |   |
| Alpha occ. eigenvalues --  | -0.77930 | -0.77930 | -0.77672 | - |
| 0.77672 -0.77672           |          |          |          |   |
| Alpha occ. eigenvalues --  | -0.43028 | -0.43028 | -0.41422 | - |
| 0.41422 -0.41422           |          |          |          |   |
| Alpha occ. eigenvalues --  | -0.38636 | -0.33931 | -0.33931 | - |
| 0.33931 -0.29286           |          |          |          |   |
| Alpha occ. eigenvalues --  | -0.29286 | -0.29286 | -0.28702 | - |
| 0.28702 -0.28702           |          |          |          |   |
| Alpha occ. eigenvalues --  | -0.28275 | -0.28275 | -0.28275 | - |
| 0.27140 -0.27140           |          |          |          |   |
| Alpha occ. eigenvalues --  | -0.27140 |          |          |   |
| Alpha virt. eigenvalues -- | -0.12350 | -0.12350 | 0.12910  |   |
| 0.15794 0.15794            |          |          |          |   |
| Alpha virt. eigenvalues -- | 0.15794  | 0.19625  | 0.19625  |   |
| 0.20678 0.23974            |          |          |          |   |
| Alpha virt. eigenvalues -- | 0.23974  | 0.23974  | 0.30480  |   |
| 0.30480 0.30480            |          |          |          |   |
| Alpha virt. eigenvalues -- | 0.43183  | 0.43183  | 0.43670  |   |
| 0.43670 0.43670            |          |          |          |   |
| Alpha virt. eigenvalues -- | 0.44974  | 0.47937  | 0.47937  |   |
| 0.47937 0.53055            |          |          |          |   |
| Alpha virt. eigenvalues -- | 0.53055  | 0.53055  | 0.58233  |   |
| 0.58233 0.58233            |          |          |          |   |
| Alpha virt. eigenvalues -- | 0.61943  | 0.61943  | 0.61943  |   |
| 0.69252 0.69252            |          |          |          |   |
| Alpha virt. eigenvalues -- | 0.69255  | 0.69255  | 0.69255  |   |
| 0.71745 0.71745            |          |          |          |   |
| Alpha virt. eigenvalues -- | 0.71745  | 0.78049  | 0.78049  |   |
| 0.78049 0.80795            |          |          |          |   |
| Alpha virt. eigenvalues -- | 0.89358  | 0.89358  | 0.89358  |   |
| 0.92727 0.92727            |          |          |          |   |
| Alpha virt. eigenvalues -- | 0.92790  | 0.93961  | 0.93961  |   |
| 0.93961 0.94023            |          |          |          |   |
| Alpha virt. eigenvalues -- | 0.94023  | 0.94023  | 0.95769  |   |
| 0.96705 0.96705            |          |          |          |   |
| Alpha virt. eigenvalues -- | 0.96830  | 0.96830  | 0.96830  |   |
| 1.00239 1.08958            |          |          |          |   |
| Alpha virt. eigenvalues -- | 1.08958  | 1.17408  | 1.17408  |   |
| 1.17408 1.17603            |          |          |          |   |
| Alpha virt. eigenvalues -- | 1.17603  | 1.17603  | 1.19745  |   |
| 1.19745 1.19745            |          |          |          |   |

```
Alpha virt. eigenvalues --      1.23434   1.44128   1.44128
1.44128   1.54749
Alpha virt. eigenvalues --      1.54999   1.54999   1.75760
1.75760   1.75760
Alpha virt. eigenvalues --      2.67569   2.75715   2.75715
2.75715   3.02636
Alpha virt. eigenvalues --      3.02636   3.02636   3.03835
3.03835   3.03835
Alpha virt. eigenvalues --      3.27427   3.27427   5.33624
7.06218   7.06218
Alpha virt. eigenvalues --      7.06218  14.55243  14.55243
14.55243  14.71416
Alpha virt. eigenvalues --     14.71416  22.27823  39.84732
39.84732  39.84732
Alpha virt. eigenvalues --     89.95852  89.95852  89.95852
90.04589  90.04589
Alpha virt. eigenvalues --    104.46728 234.40143 234.40143
234.40143 455.66079
Alpha virt. eigenvalues --
1328.538651328.538651328.538651661.614915146.10521
Alpha virt. eigenvalues -- *****
Condensed to atoms (all electrons):
          1          2          3          4          5
6
  1 Pt  76.871706   0.196741   0.196741   0.196741   0.196741
0.196741
  2 Cl   0.196741  17.194420  -0.015756  -0.015756  -0.015756
-0.015756
  3 Cl   0.196741  -0.015756  17.194420  -0.015756  -0.015756
-0.003495
  4 Cl   0.196741  -0.015756  -0.015756  17.194420  -0.003495
-0.015756
  5 Cl   0.196741  -0.015756  -0.015756  -0.003495  17.194420
-0.015756
  6 Cl   0.196741  -0.015756  -0.003495  -0.015756  -0.015756
17.194420
  7 Cl   0.196741  -0.003495  -0.015756  -0.015756  -0.015756
-0.015756
7
  1 Pt   0.196741
  2 Cl  -0.003495
  3 Cl  -0.015756
  4 Cl  -0.015756
  5 Cl  -0.015756
  6 Cl  -0.015756
  7 Cl  17.194420
Mulliken atomic charges:
  1
  1 Pt  -0.052152
  2 Cl  -0.324641
```

```
3 Cl -0.324641
4 Cl -0.324641
5 Cl -0.324641
6 Cl -0.324641
7 Cl -0.324641
Sum of Mulliken atomic charges = -2.00000
Mulliken charges with hydrogens summed into heavy atoms:
  1
1 Pt -0.052152
2 Cl -0.324641
3 Cl -0.324641
4 Cl -0.324641
5 Cl -0.324641
6 Cl -0.324641
7 Cl -0.324641
Sum of Mulliken charges with hydrogens summed into heavy atoms =
-2.00000
Electronic spatial extent (au): <R**2>=          2382.8298
Charge=          -2.0000 electrons
Dipole moment (field-independent basis, Debye):
  X=          0.0000  Y=          0.0000  Z=
0.0000 Tot=          0.0000
Quadrupole moment (field-independent basis, Debye-Ang):
  XX=          -130.7243  YY=          -130.7243  ZZ=
-130.7243
  XY=          0.0000  XZ=          0.0000  YZ=
0.0000
Traceless Quadrupole moment (field-independent basis, Debye-
Ang):
  XX=          0.0000  YY=          0.0000  ZZ=
0.0000
  XY=          0.0000  XZ=          0.0000  YZ=
0.0000
Octapole moment (field-independent basis, Debye-Ang**2):
  XXX=          0.0000  YYY=          0.0000  ZZZ=
0.0000  XYY=          0.0000
  XXY=          0.0000  XXZ=          0.0000  XZZ=
0.0000  YZZ=          0.0000
  YYZ=          0.0000  XYZ=          0.0000
Hexadecapole moment (field-independent basis, Debye-Ang**3):
  XXXX=          -1132.2790  YYYY=          -1132.2790  ZZZZ=
-1132.2790  XXXY=          0.0000
  XXXZ=          0.0000  YYYYX=          0.0000  YYYZ=
0.0000  ZZZX=          0.0000
  ZZZY=          0.0000  XXYY=          -360.5399  XXZZ=
-360.5399  YYZZ=          -360.5399
  XXYZ=          0.0000  YYXZ=          0.0000  ZZXY=
0.0000
N-N= 2.394392993762D+03 E-N=-5.262142356470D+04 KE=
2.004828796335D+04
```

```
Symmetry AG KE= 1.016728155800D+04
Symmetry B1G KE= 6.706929152014D+02
Symmetry B2G KE= 6.706929152014D+02
Symmetry B3G KE= 6.706929152014D+02
Symmetry AU KE= 9.568189544165D+01
Symmetry B1U KE= 2.591081921435D+03
Symmetry B2U KE= 2.591081921435D+03
Symmetry B3U KE= 2.591081921435D+03
Calculating spin-rotation constants.
Leave Link 601 at Sat Nov 30 20:53:53 2013, MaxMem= 104857600
cpu: 3.0
(Enter C:\G09W\19999.exe)
1|1|UNPC-DHRT3V4J|SP|RPBE1PBE|Gen|Cl6Pt1(2-)|PC2|30-Nov-
2013|0||#p pbe
lpbe/gen nmr=giao integral(ultrafine) SCRF(solvent=water)
SCF(NoVarAcc
,maxcycles=1000)||PtCl62-SARCZORA||-
2,1|Pt,0,0.,0.,0.|Cl,0,0.,0.,2.396
1|Cl,0,0.,2.3961,0.|Cl,0,-
2.3961,0.,0.|Cl,0,2.3961,0.,0.|Cl,0,0.,-2.39
61,0.|Cl,0,0.,0.,-2.3961||Version=IA32W-G09RevB.01|State=1-
A1G|HF=-200
75.5098875|RMSD=1.932e-
009|Dipole=0.,0.,0.|Quadrupole=0.,0.,0.,0.,0.,0
.|PG=OH [O(Pt1),3C4(Cl1.Cl1)]||@
```

BE NOT THE FIRST BY WHOM THE NEW ARE TRIED,  
NOR YET THE THE LAST TO LAY THE OLD ASIDE.

-- ALEXANDER POPE

```
Job cpu time: 0 days 0 hours 8 minutes 46.0 seconds.
File lengths (MBytes): RWF= 57 Int= 0 D2E= 0 Chk=
4 Scr= 1
Normal termination of Gaussian 09 at Sat Nov 30 20:53:53 2013.
```
